# Supplementary material for: Oxazoline amino acid bioconjugates: one-pot synthesis and analysis of supramolecular interactions
Source: Royal Society of Chemistry journal article supplement (doi:10.1039/d4nj00995a), 2024-01-01
Supplement: d4nj00995a3.xlsx [file d4nj00995a3.xlsx]

## Sheet: CONF1
Orca lab.	Lab	sigma	Av(258K)	Av(298K)	C1(shift(TMS))	C2(shift(TMS))	ExpSh(258K)	ExpSh(298K)	CalSh(258K)	CalSh(298K)			Orca lab.	Lab	sigma	Av(sigma)	C(shift(TMS))	E(shift)	C(shift)
1H	1H	1H	1H	1H	1H	1H	1H	1H	1H	1H			13C	13C	13C	13C	13C	13C	13C
1	2	22.587	22.4735	22.4735	9.2585	9.2585	8.22	8.29	8.4543	8.53325			0	1	42.983	42.526	147.772	129.679	130.933
4	5	23.265	22.9695	22.9695	8.7625	8.7625	8.19	8.29	7.98553	8.05604			2	3	41.408	40.24	150.058	134.903	133.057
7	8	22.577											3	4	47.367	43.978	146.32	129.083	129.584
14	15	27.046	26.951	26.973	4.781	4.759	4.19	4.16	4.22261	4.20428			5	6	46.888	47.5455	142.752	128.334	126.27
15	16	26.958	26.995		4.737		4.17		4.18103				6	7	41.044
17	18	29.848	29.8442	29.8442	1.88783	1.88783	1.42	1.41	1.48828	1.44193			8	9	37.548
18	19	30.107											10	11	7.938	7.82	182.478	161.781	163.175
19	20	30.101											12	13	109.511	110.119	80.1785	67.472	68.139
21	22	29.153	29.788	29.788	1.944	1.944	1.53	1.465	1.54136	1.49597			13	14	98.44	98.422	91.876	79.352	79.006
22	23	29.885											16	17	154.603	155.478	34.8205	27.002	26.0014
23	24	29.391											20	21	156.299
27	28	23.704	22.3388	22.3388	9.39325	9.39325	8.12	7.615	8.58165	8.66289			24	25	10.392	6.75725	183.541	166.965	164.163
29	30	25.817	26.34	26.34	5.392	5.392	4.86	4.84	4.80007	4.81329			28	29	132	129.963	60.3355	48.85	49.7048
31	32	29.827	29.709	29.709	2.023	2.023	1.61	1.57	1.61602	1.57197			30	31	167.066	166.809	23.4892	15.823	15.4747
32	33	29.987											34	35	-3.982	-5.512	195.81	173.23	175.561
33	34	29.459											37	38	127.896	126.493	63.805	51.445	52.928
38	39	27.569	27.4706	27.4706	4.26142	4.26142	3.82	3.81	3.73155	3.72555			41	42	2.791
39	40	27.601											45	46	128.424			MAE:	1.29944
40	41	27.745						MAE(C-H):	0.0796056	0.087188			47	48	167.751
44	45	21.092						AE(N-H):	0.461647	1.04789			51	52	-5.21
46	47	27.041											54	55	126.206
48	49	29.637
49	50	29.152											58	59	42.069
50	51	30.103											60	61	39.616
55	56	27.588											61	62	41.451
56	57	27.5											63	64	48.203
57	58	27.133											64	65	46.05
													66	67	42.388
59	60	22.36											68	69	7.702
62	63	22.841											70	71	110.728
65	66	23.195											71	72	98.404
72	73	26.856											74	75	156.164
73	74	27.032											78	79	154.844
75	76	29.56											82	83	2.925
76	77	29.613											86	87	127.492
77	78	29.836											88	89	166.054
79	80	30.136											92	93	-8.282
80	81	30.107											95	96	125.154
81	82	30.056											99	100	10.921
85	86	21.463											103	104	131.934
87	88	26.752											105	106	166.364
89	90	29.727											109	110	-4.574
90	91	29.673											112	113	126.716
91	92	29.319
96	97	27.216
97	98	27.504
98	99	27.642
102	103	23.096
104	105	25.75
106	107	29.645
107	108	30.375
108	109	29.604
113	114	27.497
114	115	27.393
115	116	27.259
										L1
orca lab		1	4	7	14	15	17	18	19	21	22	23	27	29	31	32	33	38	39	40	44	46	48	49	50	55	56	57
	Lab.	2	5	8	15	16	18	19	20	22	23	24	28	30	32	33	34	39	40	41	45	47	49	50	51	56	57	58
1	2	0	0.898	0.871	-0.011	0	0	0	0.013	0	0	0	0.059	-0.003	0.002	0.004	-0.006	0	0	0	-0.145	0.031	-0.02	0.001	0.001	0	0	0
4	5	0.898	0	0.69	-0.011	0.008	0.008	-0.084	0.013	0.01	-0.023	0.006	-0.328	0.093	-0.001	0.002	-0.012	0	0	0	-0.006	-0.002	0	0	0	0	0	0
7	8	0.871	0.69	0	0.005	-0.007	0.009	-0.089	0.017	0.012	-0.02	0.001	0.031	0.006	0	0	0	0	0	0	0.029	0.007	-0.021	0.002	0.004	0.001	0	0
14	15	-0.011	-0.011	0.005	0	-9.083	1.34	-0.409	-0.068	-0.39	-0.262	0.298	0	0	0	0	0	0	0	0	0	0	0	0	0	0	0	0
15	16	0	0.008	-0.007	-9.083	0	0.477	-0.299	-0.317	0.094	-0.224	0.051	0	0	0	0	0	0	0	0	0	0	0	0	0	0	0	0
17	18	0	0.008	0.009	1.34	0.477	0	-13.412	-12.505	-0.166	-0.207	-0.177	0	0	0	0	0	0	0	0	0	0	0	0	0	0	0	0
18	19	0	-0.084	-0.089	-0.409	-0.299	-13.412	0	-12.491	0.039	-0.161	-0.213	0.001	0	0	0	0	0	0	0	0	0	0	0	0	0	0	0
19	20	0.013	0.013	0.017	-0.068	-0.317	-12.505	-12.491	0	3.216	-0.048	-0.101	0	0	0	0	0	0	0	0	0	0	0	0	0	0	0	0
21	22	0	0.01	0.012	-0.39	0.094	-0.166	0.039	3.216	0	-13.348	-12.251	0	0	0	0	0	0	0	0	0	0	0	0	0	0	0	0
22	23	0	-0.023	-0.02	-0.262	-0.224	-0.207	-0.161	-0.048	-13.348	0	-13.716	0	0	0	0	0	0	0	0	0	0	0	0	0	0	0	0
23	24	0	0.006	0.001	0.298	0.051	-0.177	-0.213	-0.101	-12.251	-13.716	0	0	0	0	0	0	0	0	0	0	0	0	0	0	0	0	0
27	28	0.059	-0.328	0.031	0	0	0	0.001	0	0	0	0	0	10.214	-0.117	-0.146	-0.393	-0.008	-0.011	0.003	0	0	0	0	0	0	0	0
29	30	-0.003	0.093	0.006	0	0	0	0	0	0	0	0	10.214	0	13.088	5.464	2.62	0.606	0.577	0.04	0	0	0	0	0	0	0	0
31	32	0.002	-0.001	0	0	0	0	0	0	0	0	0	-0.117	13.088	0	-12.388	-13.08	0.009	-0.005	-0.006	0	0	0	0	0	0	0	0
32	33	0.004	0.002	0	0	0	0	0	0	0	0	0	-0.146	5.464	-12.388	0	-13.574	-0.069	-0.072	0.048	0	0	0	0	0	0	0	0
33	34	-0.006	-0.012	0	0	0	0	0	0	0	0	0	-0.393	2.62	-13.08	-13.574	0	-0.004	-0.012	0.015	0	0	0	0	0	0	0	0
38	39	0	0	0	0	0	0	0	0	0	0	0	-0.008	0.606	0.009	-0.069	-0.004	0	-10.455	-10.337	0	0	0	0	0	0	0	0
39	40	0	0	0	0	0	0	0	0	0	0	0	-0.011	0.577	-0.005	-0.072	-0.012	-10.455	0	-10.622	0	0	0	0	0	0	0	0
40	41	0	0	0	0	0	0	0	0	0	0	0	0.003	0.04	-0.006	0.048	0.015	-10.337	-10.622	0	0	0	0	0	0	0	0	0
44	45	-0.145	-0.006	0.029	0	0	0	0	0	0	0	0	0	0	0	0	0	0	0	0	0	7.212	0.306	-0.384	-0.165	-0.033	-0.015	-0.028
46	47	0.031	-0.002	0.007	0	0	0	0	0	0	0	0	0	0	0	0	0	0	0	0	7.212	0	4.074	13.196	3.718	0.707	0.022	0.442
48	49	-0.02	0	-0.021	0	0	0	0	0	0	0	0	0	0	0	0	0	0	0	0	0.306	4.074	0	-12.852	-13.415	-0.004	-0.005	-0.004
49	50	0.001	0	0.002	0	0	0	0	0	0	0	0	0	0	0	0	0	0	0	0	-0.384	13.196	-12.852	0	-12.585	-0.013	0.014	-0.023
50	51	0.001	0	0.004	0	0	0	0	0	0	0	0	0	0	0	0	0	0	0	0	-0.165	3.718	-13.415	-12.585	0	0.031	0.022	-0.013
55	56	0	0	0.001	0	0	0	0	0	0	0	0	0	0	0	0	0	0	0	0	-0.033	0.707	-0.004	-0.013	0.031	0	-10.706	-10.909
56	57	0	0	0	0	0	0	0	0	0	0	0	0	0	0	0	0	0	0	0	-0.015	0.022	-0.005	0.014	0.022	-10.706	0	-10.691
57	58	0	0	0	0	0	0	0	0	0	0	0	0	0	0	0	0	0	0	0	-0.028	0.442	-0.004	-0.023	-0.013	-10.909	-10.691	0
residual:	0.707
										L2
orca lab		59	62	65	72	73	75	76	77	79	80	81	85	87	89	90	91	96	97	98	102	104	106	107	108	113	114	115
	lab	60	63	66	73	74	76	77	78	80	81	82	86	88	90	91	92	97	98	99	103	105	107	108	109	114	115	116
59	60	0	0.862	0.932	0	-0.01	0	0	0	0.014	0	0	-0.148	-0.068	0.011	0	0.002	0	0	0	0.061	-0.005	0.005	0.005	-0.016	-0.001	0	-0.001
62	63	0.862	0	0.692	-0.01	0.002	0.012	0.002	-0.019	0.018	-0.094	0.008	0.035	-0.089	0.011	0	0.003	0	0	0	0.032	0.004	0	0.003	0	0	0	0
65	66	0.932	0.692	0	0.008	-0.01	0.009	0.006	-0.021	0.014	-0.088	0.007	0.003	-0.062	0	0	0	0	0	0	-0.324	0.087	0.001	0.002	-0.018	-0.001	0	0
72	73	0	-0.01	0.008	0	-9.171	0.059	-0.021	-0.226	-0.313	-0.295	0.468	0	0	0	0	0	0	0	0	0	0	0	0	0	0	0	0
73	74	-0.01	0.002	-0.01	-9.171	0	-0.378	0.207	-0.265	-0.074	-0.425	1.441	0	0	0	0	0	0	0	0	0	0	0	0	0	0	0	0
75	76	0	0.012	0.009	0.059	-0.378	0	-12.236	-13.173	3.216	0.081	-0.2	0	0	0	0	0	0	0	0	0	0	0	0	0	0	0	0
76	77	0	0.002	0.006	-0.021	0.207	-12.236	0	-13.744	-0.035	-0.218	-0.186	0	0	0	0	0	0	0	0	0	0	0	0	0	0	0	0
77	78	0	-0.019	-0.021	-0.226	-0.265	-13.173	-13.744	0	-0.087	-0.133	-0.184	0	0	0	0	0	0	0	0	0	0	0	0	0	0	0	0
79	80	0.014	0.018	0.014	-0.313	-0.074	3.216	-0.035	-0.087	0	-12.407	-12.545	0	0	0	0	0	0	0	0	0	0	0	0	0	0	0	0
80	81	0	-0.094	-0.088	-0.295	-0.425	0.081	-0.218	-0.133	-12.407	0	-13.242	0	0	0	0	0	0	0	0	0.001	0	0	0	0	0	0	0
81	82	0	0.008	0.007	0.468	1.441	-0.2	-0.186	-0.184	-12.545	-13.242	0	0	0	0	0	0	0	0	0	0	0	0	0	0	0	0	0
85	86	-0.148	0.035	0.003	0	0	0	0	0	0	0	0	0	5.345	-0.38	-0.197	-0.221	-0.025	-0.02	-0.032	0	0	0	0	0	0	0	0
87	88	-0.068	-0.089	-0.062	0	0	0	0	0	0	0	0	5.345	0	2.907	13.589	4.93	0.113	0.012	0.133	0	0	0	0	0	0	0	0
89	90	0.011	0.011	0	0	0	0	0	0	0	0	0	-0.38	2.907	0	-13.034	-14.319	0.008	-0.001	0.024	0	0	0	0	0	0	0	0
90	91	0	0	0	0	0	0	0	0	0	0	0	-0.197	13.589	-13.034	0	-11.606	-0.022	0.003	-0.028	0	0	0	0	0	0	0	0
91	92	0.002	0.003	0	0	0	0	0	0	0	0	0	-0.221	4.93	-14.319	-11.606	0	0.02	-0.002	0.089	0	0	0	0	0	0	0	0
96	97	0	0	0	0	0	0	0	0	0	0	0	-0.025	0.113	0.008	-0.022	0.02	0	-10.7	-10.909	0	0	0	0	0	0	0	0
97	98	0	0	0	0	0	0	0	0	0	0	0	-0.02	0.012	-0.001	0.003	-0.002	-10.7	0	-10.536	0	0	0	0	0	0	0	0
98	99	0	0	0	0	0	0	0	0	0	0	0	-0.032	0.133	0.024	-0.028	0.089	-10.909	-10.536	0	0	0	0	0	0	0	0	0
102	103	0.061	0.032	-0.324	0	0	0	0	0	0	0.001	0	0	0	0	0	0	0	0	0	0	9.929	-0.114	-0.154	-0.356	-0.009	-0.012	0.003
104	105	-0.005	0.004	0.087	0	0	0	0	0	0	0	0	0	0	0	0	0	0	0	0	9.929	0	13.093	4.196	3.492	0.651	0.605	0.039
106	107	0.005	0	0.001	0	0	0	0	0	0	0	0	0	0	0	0	0	0	0	0	-0.114	13.093	0	-12.057	-12.954	0.005	-0.003	-0.001
107	108	0.005	0.003	0.002	0	0	0	0	0	0	0	0	0	0	0	0	0	0	0	0	-0.154	4.196	-12.057	0	-13.198	-0.064	-0.071	0.061
108	109	-0.016	0	-0.018	0	0	0	0	0	0	0	0	0	0	0	0	0	0	0	0	-0.356	3.492	-12.954	-13.198	0	-0.002	-0.01	0.01
113	114	-0.001	0	-0.001	0	0	0	0	0	0	0	0	0	0	0	0	0	0	0	0	-0.009	0.651	0.005	-0.064	-0.002	0	-10.096	-10.032
114	115	0	0	0	0	0	0	0	0	0	0	0	0	0	0	0	0	0	0	0	-0.012	0.605	-0.003	-0.071	-0.01	-10.096	0	-11.209
115	116	-0.001	0	0	0	0	0	0	0	0	0	0	0	0	0	0	0	0	0	0	0.003	0.039	-0.001	0.061	0.01	-10.032	-11.209	0
residual:	0.651
										L1-L2
orca lab		1	4	7	14	15	17	18	19	21	22	23	27	29	31	32	33	38	39	40	44	46	48	49	50	55	56	57
	lab	2	5	8	15	16	18	19	20	22	23	24	28	30	32	33	34	39	40	41	45	47	49	50	51	56	57	58
59	60	0.002	-0.011	0.003	-0.004	0.003	0.001	0.003	0.001	-0.148	-0.037	0.008	0	0	-0.001	0	0	0	0	0	0.005	-0.001	0	0	0	0	0	0
62	63	0.004	-0.015	-0.002	-0.001	0	0	0	0	-0.002	0	-0.001	0.01	0.004	-0.006	-0.094	-0.014	0	0	0	0.007	-0.001	0	0	0	0	0	0
65	66	-0.009	-0.013	-0.011	-0.001	0	0	0	0	0	0	0	0	0	0.001	0	0	0	0	0	-0.034	0.001	0	0	0	0	0	0
72	73	0.003	0	0	0	0	0	0	0	0	0	0	-0.001	0	0	-0.001	0	0	0	0	0	0.003	0	0	0	0	0	0
73	74	-0.004	-0.001	0	0	0	0	0	0	0	0	0	0.001	-0.001	0	-0.002	-0.001	0	0	0	0.003	0.001	0	0.001	0	0	0	0
75	76	-0.079	-0.001	-0.003	0	0	0	0	0	0	0	0	-0.001	0	0	0	0	0	0	0	-0.003	-0.004	0	0	-0.003	0	0	0
76	77	-0.002	0	-0.001	0	0	0	0	0	0	0	0	0	0	0	0	0	0	0	0	-0.027	-0.071	-0.001	-0.007	-0.044	0.001	0	0
77	78	-0.007	0	0	0	0	0	0	0	0	0	0	0	0	0	0	0	0	0	0	0.024	-0.012	0.001	-0.002	-0.004	0	0	0
79	80	0	0	0	0	0	0	0	0	0	0	0	0	0	0	0	0	0	0	0	-0.005	-0.003	0	0	0	0	0	0
80	81	0.003	0	0	0	0	0	0	0	0	0	0	0	0	0	0	0	0	0	0	0.017	-0.004	0	0.001	0	0	0	0
81	82	0	0	0	0	0	0	0	0	0	0	0	0	0	0	0	0	0	0	0	0.001	-0.026	0	0.001	0	0	0	0
85	86	0.001	-0.035	0.002	0.007	0.002	0.002	0.003	-0.001	0.003	0.011	-0.029	0.001	0.002	0.003	0.001	0.002	0	0	0	0	0	0	0	0	0	0	0
87	88	0	-0.005	0	-0.001	-0.002	-0.002	0.01	-0.001	-0.001	-0.003	-0.008	0.009	0	-0.009	-0.003	-0.001	0	0	0	0	0	0	0	0	0	0	0
89	90	0	0	0	-0.001	-0.001	-0.016	0.007	-0.003	-0.01	0.009	-0.018	0	0	0	0	0	0	0	0	0	0	0	0	0	0	0	0
90	91	0	-0.001	0	-0.001	0	-0.179	-0.009	-0.016	0	0.003	0.02	0	0.001	0	0	0	0	0	0	0	0	0	0	0	0	0	0
91	92	0	-0.002	0	-0.001	-0.001	-0.085	-0.011	-0.009	-0.028	-0.011	-0.16	-0.005	0	0.001	0	0.001	0	0	0	0	0	0	0	0	0	0	0
96	97	0	0	0	0	0	0	0	0	0	0	0	-0.004	-0.012	-0.12	-0.019	-0.008	-0.002	-0.004	-0.001	0	0	0	0	0	0	0	0
97	98	0	0	0	0	0	0	0	0	0	0	0	0.001	0.001	-0.004	0.009	-0.001	-0.001	-0.003	0.001	0	0	0	0	0	0	0	0
98	99	0	0	0	0	0	0	0	0	0	0	0	-0.001	-0.006	-0.02	-0.005	-0.004	-0.006	-0.037	-0.004	0	0	0	0	0	0	0	0
102	103	-0.001	-0.001	-0.002	0	-0.002	0	0	0	-0.007	-0.002	-0.001	0	0	0	0	0	0	0	0	0.001	-0.002	0	0	0.003	0.001	0.001	0.001
104	105	0	0	0.005	-0.004	0	0	0	0	0	0	0	0	0	0	0	0	0	0	0	0	0.001	0	0	0	0.007	0.01	-0.008
106	107	0	0	0	0	0	0	0	0	0	0	0	0	0	0	0	0	0	0	0	0	0.001	0	0	-0.002	-0.027	0	0.004
107	108	0	0	0.001	0	0	0	0	0	0	0	0	0	0	0	0	0	0	0	0	0	0	0	0	0	-0.004	0.005	0.005
108	109	0	0	0.003	0	0.001	0	0	0	0	0	0	0	0	0	0	0	0	0	0	0	0	0	0	0	-0.005	-0.003	0.001
113	114	0	0	0.018	0	0	0	0	0	0	0	0	0	0	0	0	0	0	0	0	0.015	-0.001	0	0	0	-0.004	-0.002	-0.014
114	115	-0.001	-0.001	-0.001	0	0	0	0	0	0	0	0	0	0	0	0	0	0	0	0	0.007	-0.001	0	0	0	-0.01	-0.006	-0.05
115	116	0	0	-0.041	0	0	0	0	0	0	0	0	0	0	0	0	0	0	0	0	0.005	0	0	0	0	0	-0.001	-0.003
								residual:	0.179
2-bond
J(15-16)	J(18-19)	J(22-23)	J(32-33)	J(39-40)
-9.127	-12.9268	-12.9182	-12.9218	-10.6002
3-bond
J(28-30)	J(30-32)
8.175	7.03058
4-bond
J(2-5)	J(5-8)	J(15-18)	J(16-18)	J(18-22)	J(28-32)
0.89075	0.691	0.128167	-0.0890833	0.246444	-0.193417

## Sheet: CONF2
Orca lab.	Lab	sigma	Av(258K)	Av(298K)	C1(shift(TMS))	C2(shift(TMS))	ExpSh(258K)	ExpSh(298K)	CalSh(258K)	CalSh(298K)			Orca lab.	Lab	sigma	Av(sigma)	C(shift(TMS))	E(shift)	C(shift)
1H	1H	1H	1H	1H	1H	1H	1H	1H	1H	1H			13C	13C	13C	13C	13C	13C	13C
1	2	22.485	22.507	22.507	9.225	9.225	8.22	8.29	8.43959	8.51947			0	1	43.055	43.1035	147.195	129.679	129.814
4	5	22.807	22.911	22.911	8.821	8.821	8.19	8.29	8.05535	8.12828			2	3	38.454	41.3188	148.979	134.903	131.471
7	8	23.003											3	4	40.378	42.1158	148.182	129.083	130.731
14	15	26.855	26.8785	26.9438	4.8535	4.78825	4.19	4.16	4.28186	4.22337			5	6	45.75	45.8315	144.466	128.334	127.281
15	16	26.999	27.009		4.723		4.17		4.15774				6	7	43.843
17	18	30.071	30.0113	30.0113	1.72067	1.72067	1.42	1.41	1.30222	1.25303			8	9	44.263
18	19	29.854											10	11	7.639	7.786	182.512	161.781	162.61
19	20	30.095											12	13	109.345	109.306	80.992	67.472	68.3384
21	22	29.932	29.4853	29.4853	2.24667	2.24667	1.53	1.465	1.8025	1.76235			13	14	98.628	98.682	91.616	79.352	78.2039
22	23	29.446											16	17	154.063	155.328	34.9695	27.002	25.602
23	24	29.089											20	21	156.717
27	28	22.316	22.2082	22.2082	9.52375	9.52375	8.12	7.615	8.72373	8.80875			24	25	4.582	6.40425	183.894	166.965	163.893
29	30	26.828	26.5827	26.5827	5.14925	5.14925	4.86	4.84	4.56315	4.57292			28	29	126.752	128.029	62.2688	48.85	50.952
31	32	29.556	29.6852	29.6852	2.04683	2.04683	1.61	1.57	1.61244	1.56885			30	31	164.99	166.165	24.1327	15.823	15.5389
32	33	29.517											34	35	-5.596	-7.3745	197.673	173.23	176.688
33	34	29.712											37	38	125.786	126.074	64.2245	51.445	52.7681
38	39	27.667	27.3756	27.3756	4.35642	4.35642	3.82	3.81	3.80908	3.80522			41	42	8.648
39	40	27.002											45	46	129.682			MAE:	1.59622
40	41	27.652						MAE(C-H):	0.128761	0.147736			47	48	167.162
44	45	22.23						AE(N-H):	0.603733	1.19375			51	52	-9.157
46	47	26.287											54	55	126.524
48	49	29.848
49	50	29.695											58	59	43.152
50	51	29.827											60	61	38.361
55	56	27.446											61	62	40.281
56	57	27.077											63	64	45.913
57	58	27.376											64	65	43.961
													66	67	44.197
59	60	22.529											68	69	7.933
62	63	22.833											70	71	109.267
65	66	23.001											71	72	98.736
72	73	26.902											74	75	153.961
73	74	27.019											78	79	156.573
75	76	29.867											82	83	4.338
76	77	30.091											86	87	126.611
77	78	30.09											88	89	164.989
79	80	29.455											92	93	-5.572
80	81	29.058											95	96	125.48
81	82	29.932											99	100	8.049
85	86	22.041											103	104	129.072
87	88	26.822											105	106	167.52
89	90	29.522											109	110	-9.173
90	91	29.529											112	113	126.504
91	92	29.73
96	97	27.562
97	98	27.082
98	99	27.739
102	103	22.246
104	105	26.394
106	107	29.82
107	108	29.678
108	109	29.788
113	114	27.376
114	115	27.412
115	116	27.116
										L1
orca lab		1	4	7	14	15	17	18	19	21	22	23	27	29	31	32	33	38	39	40	44	46	48	49	50	55	56	57
	Lab.	2	5	8	15	16	18	19	20	22	23	24	28	30	32	33	34	39	40	41	45	47	49	50	51	56	57	58
1	2	0	0.874	0.962	-0.013	0	0.011	0	0	0	0	0	-0.191	-0.031	0	0.001	0.006	-0.001	0	0	0.056	-0.052	0.007	-0.001	0.002	0.001	0	0
4	5	0.874	0	0.64	-0.012	0.011	0.012	0.007	-0.084	-0.018	0.006	0.009	0.04	-0.062	0	0.004	0.008	-0.001	-0.001	0	0.031	-0.035	0	0	0	0	0	0
7	8	0.962	0.64	0	0.002	-0.003	0.016	0.007	-0.088	-0.013	0.002	0.01	0.003	-0.038	0	0	0	0	0	0	-0.332	0.01	0.003	-0.002	0	0.001	0	0
14	15	-0.013	-0.012	0.002	0	-8.48	-0.054	1.281	-0.402	-0.265	0.306	-0.372	0	0	0	0	0	0	0	0	0	0	0	0	0	0	0	0
15	16	0	0.011	-0.003	-8.48	0	-0.321	0.468	-0.293	-0.247	0.085	0.08	0	0	0	0	0	0	0	0	0	0	0	0	0	0	0	0
17	18	0.011	0.012	0.016	-0.054	-0.321	0	-12.618	-12.317	-0.116	-0.033	3.171	0	0	0	0	0	0	0	0	0	0	0	0	0	0	0	0
18	19	0	0.007	0.007	1.281	0.468	-12.618	0	-13.33	-0.2	-0.186	-0.196	0	0	0	0	0	0	0	0	0	0	0	0	0	0	0	0
19	20	0	-0.084	-0.088	-0.402	-0.293	-12.317	-13.33	0	-0.159	-0.218	0.063	0	0	0	0	0	0	0	0	0	0	0	0	0	0	0	0
21	22	0	-0.018	-0.013	-0.265	-0.247	-0.116	-0.2	-0.159	0	-13.701	-13.249	0	0	0	0	0	0	0	0	0	0	0	0	0	0	0	0
22	23	0	0.006	0.002	0.306	0.085	-0.033	-0.186	-0.218	-13.701	0	-12.002	0	0	0	0	0	0	0	0	0	0	0	0	0	0	0	0
23	24	0	0.009	0.01	-0.372	0.08	3.171	-0.196	0.063	-13.249	-12.002	0	0	0	0	0	0	0	0	0	0	0	0	0	0	0	0	0
27	28	-0.191	0.04	0.003	0	0	0	0	0	0	0	0	0	7.287	-0.188	-0.198	-0.359	-0.016	0	0.001	0	0	0	0	0	0	0	0
29	30	-0.031	-0.062	-0.038	0	0	0	0	0	0	0	0	7.287	0	13.833	5.506	2.636	0.137	0.123	0.194	0	0	0	0	0	0	0	0
31	32	0	0	0	0	0	0	0	0	0	0	0	-0.188	13.833	0	-11.436	-13.341	-0.012	0	-0.012	0	0	0	0	0	0	0	0
32	33	0.001	0.004	0	0	0	0	0	0	0	0	0	-0.198	5.506	-11.436	0	-14.107	0.085	0.012	0.012	0	0	0	0	0	0	0	0
33	34	0.006	0.008	0	0	0	0	0	0	0	0	0	-0.359	2.636	-13.341	-14.107	0	-0.02	-0.001	-0.03	0	0	0	0	0	0	0	0
38	39	-0.001	-0.001	0	0	0	0	0	0	0	0	0	-0.016	0.137	-0.012	0.085	-0.02	0	-9.883	-10.634	0	0	0	0	0	0	0	0
39	40	0	-0.001	0	0	0	0	0	0	0	0	0	0	0.123	0	0.012	-0.001	-9.883	0	-11.376	0	0	0	0	0	0	0	0
40	41	0	0	0	0	0	0	0	0	0	0	0	0.001	0.194	-0.012	0.012	-0.03	-10.634	-11.376	0	0	0	0	0	0	0	0	0
44	45	0.056	0.031	-0.332	0	0	0	0	0	0	0	0	0	0	0	0	0	0	0	0	0	8.318	-0.402	-0.162	-0.198	-0.015	-0.012	-0.018
46	47	-0.052	-0.035	0.01	0	0	0	0	0	0	0	0	0	0	0	0	0	0	0	0	8.318	0	3.113	13.795	5.051	0.124	0.125	0.019
48	49	0.007	0	0.003	0	0	0	0	0	0	0	0	0	0	0	0	0	0	0	0	-0.402	3.113	0	-13.04	-13.892	0.023	0.006	-0.001
49	50	-0.001	0	-0.002	0	0	0	0	0	0	0	0	0	0	0	0	0	0	0	0	-0.162	13.795	-13.04	0	-12.659	-0.025	-0.018	0.004
50	51	0.002	0	0	0	0	0	0	0	0	0	0	0	0	0	0	0	0	0	0	-0.198	5.051	-13.892	-12.659	0	0.093	0.015	-0.004
55	56	0.001	0	0.001	0	0	0	0	0	0	0	0	0	0	0	0	0	0	0	0	-0.015	0.124	0.023	-0.025	0.093	0	-10.903	-10.61
56	57	0	0	0	0	0	0	0	0	0	0	0	0	0	0	0	0	0	0	0	-0.012	0.125	0.006	-0.018	0.015	-10.903	0	-10.57
57	58	0	0	0	0	0	0	0	0	0	0	0	0	0	0	0	0	0	0	0	-0.018	0.019	-0.001	0.004	-0.004	-10.61	-10.57	0
residual:	0.332
										L2
orca lab		59	62	65	72	73	75	76	77	79	80	81	85	87	89	90	91	96	97	98	102	104	106	107	108	113	114	115
	lab	60	63	66	73	74	76	77	78	80	81	82	86	88	90	91	92	97	98	99	103	105	107	108	109	114	115	116
59	60	0	0.867	0.963	-0.013	0	0	0	0.012	0	0	0	-0.17	-0.03	0	0.001	0.006	-0.001	0	0	0.058	-0.063	0.009	-0.001	0.001	0	0	0
62	63	0.867	0	0.646	-0.012	0.009	0.007	-0.085	0.012	0.006	0.009	-0.021	0.038	-0.06	0	0.004	0.008	-0.001	-0.001	0	0.034	-0.044	0	0	0	0	0	0
65	66	0.963	0.646	0	0.003	-0.004	0.007	-0.088	0.016	0.002	0.011	-0.015	0.002	-0.036	0	0	0	0	0	0	-0.305	-0.006	0.005	-0.002	0	0	0.001	0
72	73	-0.013	-0.012	0.003	0	-8.49	1.258	-0.405	-0.05	0.308	-0.371	-0.281	0	0	0	0	0	0	0	0	0	0	0	0	0	0	0	0
73	74	0	0.009	-0.004	-8.49	0	0.456	-0.301	-0.322	0.113	0.088	-0.25	0	0	0	0	0	0	0	0	0	0	0	0	0	0	0	0
75	76	0	0.007	0.007	1.258	0.456	0	-13.345	-12.572	-0.186	-0.185	-0.202	0	0	0	0	0	0	0	0	0	0	0	0	0	0	0	0
76	77	0	-0.085	-0.088	-0.405	-0.301	-13.345	0	-12.329	-0.217	0.058	-0.158	0	0	0	0	0	0	0	0	0	0	0	0	0	0	0	0
77	78	0.012	0.012	0.016	-0.05	-0.322	-12.572	-12.329	0	-0.039	3.175	-0.107	0	0	0	0	0	0	0	0	0	0	0	0	0	0	0	0
79	80	0	0.006	0.002	0.308	0.113	-0.186	-0.217	-0.039	0	-12.097	-13.761	0	0	0	0	0	0	0	0	0	0	0	0	0	0	0	0
80	81	0	0.009	0.011	-0.371	0.088	-0.185	0.058	3.175	-12.097	0	-13.276	0	0	0	0	0	0	0	0	0	0	0	0	0	0	0	0
81	82	0	-0.021	-0.015	-0.281	-0.25	-0.202	-0.158	-0.107	-13.761	-13.276	0	0	0	0	0	0	0	0	0	0	0	0	0	0	0	0	0
85	86	-0.17	0.038	0.002	0	0	0	0	0	0	0	0	0	7.425	-0.19	-0.204	-0.372	-0.016	0.001	-0.001	0	0	0	0	0	0	0	0
87	88	-0.03	-0.06	-0.036	0	0	0	0	0	0	0	0	7.425	0	13.775	5.45	2.613	0.104	0.1	0.195	0	0	0	0	0	0	0	0
89	90	0	0	0	0	0	0	0	0	0	0	0	-0.19	13.775	0	-11.427	-13.301	-0.011	0.002	-0.011	0	0	0	0	0	0	0	0
90	91	0.001	0.004	0	0	0	0	0	0	0	0	0	-0.204	5.45	-11.427	0	-14.102	0.083	0.023	0.03	0	0	0	0	0	0	0	0
91	92	0.006	0.008	0	0	0	0	0	0	0	0	0	-0.372	2.613	-13.301	-14.102	0	-0.015	-0.002	-0.031	0	0	0	0	0	0	0	0
96	97	-0.001	-0.001	0	0	0	0	0	0	0	0	0	-0.016	0.104	-0.011	0.083	-0.015	0	-9.692	-10.406	0	0	0	0	0	0	0	0
97	98	0	-0.001	0	0	0	0	0	0	0	0	0	0.001	0.1	0.002	0.023	-0.002	-9.692	0	-11.636	0	0	0	0	0	0	0	0
98	99	0	0	0	0	0	0	0	0	0	0	0	-0.001	0.195	-0.011	0.03	-0.031	-10.406	-11.636	0	0	0	0	0	0	0	0	0
102	103	0.058	0.034	-0.305	0	0	0	0	0	0	0	0	0	0	0	0	0	0	0	0	0	7.694	-0.391	-0.168	-0.207	-0.019	-0.016	-0.016
104	105	-0.063	-0.044	-0.006	0	0	0	0	0	0	0	0	0	0	0	0	0	0	0	0	7.694	0	3.207	13.868	5.033	0.019	0.148	0.15
106	107	0.009	0	0.005	0	0	0	0	0	0	0	0	0	0	0	0	0	0	0	0	-0.391	3.207	0	-13.038	-13.891	-0.001	0.021	0.009
107	108	-0.001	0	-0.002	0	0	0	0	0	0	0	0	0	0	0	0	0	0	0	0	-0.168	13.868	-13.038	0	-12.652	0.002	-0.026	-0.02
108	109	0.001	0	0	0	0	0	0	0	0	0	0	0	0	0	0	0	0	0	0	-0.207	5.033	-13.891	-12.652	0	-0.002	0.096	0.023
113	114	0	0	0	0	0	0	0	0	0	0	0	0	0	0	0	0	0	0	0	-0.019	0.019	-0.001	0.002	-0.002	0	-10.536	-10.587
114	115	0	0	0.001	0	0	0	0	0	0	0	0	0	0	0	0	0	0	0	0	-0.016	0.148	0.021	-0.026	0.096	-10.536	0	-10.813
115	116	0	0	0	0	0	0	0	0	0	0	0	0	0	0	0	0	0	0	0	-0.016	0.15	0.009	-0.02	0.023	-10.587	-10.813	0
residual:	0.305
										L1-L2
orca lab		1	4	7	14	15	17	18	19	21	22	23	27	29	31	32	33	38	39	40	44	46	48	49	50	55	56	57
	lab	2	5	8	15	16	18	19	20	22	23	24	28	30	32	33	34	39	40	41	45	47	49	50	51	56	57	58
59	60	-0.003	-0.006	-0.011	-0.004	0	0.001	0	0.003	-0.006	0.002	-0.079	0.002	0	0	0	0	-0.002	-0.002	0	0	0	0	0	0	0	0	0
62	63	-0.008	-0.017	-0.021	-0.001	0	0	0	0	0	0	-0.001	-0.013	0.002	0	0	0	-0.002	-0.002	0	0	0	0	0	0	0	0	0
65	66	-0.009	-0.018	-0.014	-0.001	-0.001	0	0	0	0	0	0	0.003	0	0	0	0	0	-0.001	0	-0.001	0.001	0	0	-0.002	-0.004	-0.005	0
72	73	-0.005	-0.002	-0.002	0	0	0	0	0	0	0	0	0.005	-0.002	-0.002	0.001	0	0	0	0	0.002	-0.002	-0.001	0	0	0.028	0.003	-0.001
73	74	0	0	-0.001	0	0	0	0	0	0	0	0	-0.003	-0.001	-0.001	-0.002	-0.001	0	0	0	0	0.003	0	0	0	0.013	-0.021	-0.005
75	76	0	0	0	0	0	0	0	0	0	0	0	0.002	0.001	-0.105	-0.004	-0.009	0	0	0	0	0	0	0	0	0	0.002	0
76	77	0.003	0	0	0	0	0	0	0	0	0	0	0.004	0.004	-0.017	-0.002	-0.002	0	0	0	0	0	0	0	0	0	0	0
77	78	0.001	0	0	0	0	0	0	0	0	0	0	-0.002	-0.002	-0.012	0	-0.001	0	0	0	0	0	0	0	0	0	0.001	0
79	80	0.004	0	0	0	0	0	0	0	0	0	0	-0.018	0.008	-0.02	-0.3	-0.038	0	0	0	0	0	0	0	0	0	0.001	0
80	81	-0.084	-0.002	0	0	0	0	0	0	0	0	0	-0.002	-0.001	-0.011	-0.03	-0.018	0	0	0	-0.008	0	0	0	0	0	0	0
81	82	-0.009	0	0	0	0	0	0	0	0	0	0	0.012	0	0.026	-0.001	0.049	0	0	0	-0.003	0	0	0	0	0	0	0
85	86	0.002	-0.01	0.003	0.005	-0.002	-0.002	0.002	0.005	0.007	-0.022	-0.003	0	0	0	0	0	0	-0.008	-0.004	0	0	0	0	0	0	0	0
87	88	0	0.003	0	-0.002	-0.001	-0.003	0	0.004	0.001	0.008	-0.001	0	0.001	0	0	0	0.004	0.003	-0.002	0	0	0	0	0	0	0	0
89	90	0	0	0	-0.003	-0.001	-0.014	-0.128	-0.019	0.013	-0.036	-0.012	0	0	0	0	0	0	0	0	0	0	0	0	0	0	0	0
90	91	0	0	0	0.001	-0.002	0	-0.005	-0.002	-0.015	-0.31	-0.028	0	0	0	0	0	0	0	0	0	0	0	0	0	0	0	0
91	92	0	0	0	0	-0.001	-0.001	-0.011	-0.002	0.028	-0.044	-0.017	0	0	0	0	0	0	0	-0.001	0	0	0	0	0	0	0	0
96	97	-0.003	-0.002	0	0	0	0	0	0	0	0	0	0.003	0.005	0	0	0	-0.006	-0.001	-0.021	0	0	0	0	0	0	0	0
97	98	-0.003	-0.001	-0.002	0	0	0	0	0	0	0	0	-0.005	0.005	0	0	0	-0.001	-0.006	-0.031	0	0	0	0	0	0	0	0
98	99	-0.001	-0.001	0	0	0	0	0	0	0	0	0	-0.004	-0.002	0	0	-0.001	-0.027	-0.026	-0.192	0	0	0	0	0	0	0	0
102	103	0	0	0	0.003	0.003	0	0	0	-0.002	0	-0.007	0	0	0	0	0	0	0	0	-0.005	0.004	0	-0.001	0	0.003	0.003	0.001
104	105	0	-0.001	-0.003	-0.003	0.003	0	0	0	0	0	0	0	0	0	0	0	0	0	0	0.003	0.007	-0.005	-0.003	0.007	0	-0.001	0
106	107	0	0	0	0	0	0	0	0	0	0	0	0	0	0	0	0	0	0	0	0	-0.005	0.003	-0.006	-0.008	0.001	0.001	0
107	108	0	0	0	0	0	0	0	0	0	0	0	0	0	0	0	0	0	0	0	-0.001	-0.006	-0.005	-0.259	-0.06	-0.001	0	0
108	109	0	0	-0.002	0	0	0	0	0	0	0	0	0	0	0	0	0	0	0	0	0.001	0.006	-0.008	-0.059	-0.003	-0.001	0	0
113	114	0	0	0	-0.002	-0.004	0	0	0	0	0	0	0	0	0	0	0	0	0	0	0.001	0	0	0	0	0	0	0
114	115	0	0	-0.005	0.019	0.003	0	0	0	0	0	0	0	0	0	0	0	0	0	0	0.002	0	0.001	-0.001	0	0	0	0
115	116	0	0	-0.005	0	-0.015	0.001	0.003	0	0	0.001	0	0	0	0	0	0	0	0	0	0.003	-0.001	0.001	0	0	0	0	0
								residual:	0.31
2-bond
J(15-16)	J(18-19)	J(22-23)	J(32-33)	J(39-40)
-8.485	-12.7518	-13.0143	-13.0738	-10.6372
3-bond
J(28-30)	J(30-32)
7.681	7.32333
4-bond
J(2-5)	J(5-8)	J(15-18)	J(16-18)	J(18-22)	J(28-32)
0.9165	0.643	0.12475	-0.0823333	0.236944	-0.25325

## Sheet: CONF3
Orca lab.	Lab	sigma	Av(258K)	Av(298K)	C1(shift(TMS))	C2(shift(TMS))	ExpSh(258K)	ExpSh(298K)	CalSh(258K)	CalSh(298K)			Orca lab.	Lab	sigma	Av(sigma)	C(shift(TMS))	E(shift)	C(shift)
1H	1H	1H	1H	1H	1H	1H	1H	1H	1H	1H			13C	13C	13C	13C	13C	13C	13C
1	2	22.546	22.6125	22.6125	9.1195	9.1195	8.22	8.29	8.38596	8.46902			0	1	42.991	43.3425	146.956	129.679	129.856
4	5	23.046	23.041	23.041	8.691	8.691	8.19	8.29	7.97442	8.05012			2	3	37.807	40.5607	149.737	134.903	132.434
7	8	23.138											3	4	40.78	43.0128	147.285	129.083	130.161
14	15	26.846	26.8465	26.931	4.8855	4.801	4.19	4.16	4.31962	4.24725			5	6	46.333	46.2645	144.034	128.334	127.147
15	16	27.012	27.0155		4.7165		4.17		4.15731				6	7	44.819
17	18	30.146	30.0535	30.0535	1.6785	1.6785	1.42	1.41	1.23962	1.1947			8	9	44.295
18	19	30.207											10	11	7.48	7.866	182.432	161.781	162.739
19	20	29.915											12	13	109.804	109.596	80.7025	67.472	68.4459
21	22	29.269	29.4958	29.4958	2.23617	2.23617	1.53	1.465	1.7752	1.73987			13	14	98.391	98.418	91.88	79.352	78.8064
22	23	29.912											16	17	154.179	155.188	35.11	27.002	26.1862
23	24	29.505											20	21	156.228
27	28	22.066	22.1385	22.1385	9.5935	9.5935	8.12	7.615	8.84118	8.9324			24	25	3.786	6.60175	183.696	166.965	163.911
29	30	27.009	26.377	26.377	5.355	5.355	4.86	4.84	4.77053	4.78884			28	29	125.992	129.315	60.9835	48.85	50.1684
31	32	29.737	29.757	29.757	1.975	1.975	1.61	1.57	1.52438	1.48456			30	31	166.186	166.808	23.4905	15.823	15.4161
32	33	29.666											34	35	-4.945	-6.82475	197.123	173.23	176.356
33	34	29.34											37	38	127.5	127.072	63.226	51.445	52.247
38	39	27.694	27.3275	27.3275	4.4045	4.4045	3.82	3.81	3.85767	3.85964			41	42	9.128
39	40	27.566											45	46	130.305			MAE:	1.30086
40	41	26.827						MAE(C-H):	0.129132	0.147821			47	48	166.764
44	45	22.267						AE(N-H):	0.721185	1.3174			51	52	-9.097
46	47	26.115											54	55	126.528
48	49	29.875
49	50	29.646											58	59	43.694
50	51	29.87											60	61	36.461
55	56	27.503											61	62	41.469
56	57	27.016											63	64	46.196
57	58	27.38											64	65	44.983
													66	67	43.68
59	60	22.679											68	69	8.252
62	63	22.88											70	71	109.387
65	66	23.1											71	72	98.445
72	73	26.847											74	75	153.729
73	74	27.019											78	79	156.616
75	76	30.079											82	83	5.866
76	77	30.119											86	87	132.115
77	78	29.855											88	89	166.576
79	80	29.465											92	93	-3.938
80	81	28.927											95	96	127.766
81	82	29.897											99	100	7.627
85	86	21.98											103	104	128.846
87	88	25.97											105	106	167.704
89	90	29.699											109	110	-9.319
90	91	30.126											112	113	126.494
91	92	29.948
96	97	27.006
97	98	27.444
98	99	27.559
102	103	22.241
104	105	26.414
106	107	29.806
107	108	29.612
108	109	29.759
113	114	27.119
114	115	27.387
115	116	27.429
										L1
orca lab		1	4	7	14	15	17	18	19	21	22	23	27	29	31	32	33	38	39	40	44	46	48	49	50	55	56	57
	Lab.	2	5	8	15	16	18	19	20	22	23	24	28	30	32	33	34	39	40	41	45	47	49	50	51	56	57	58
1	2	0	0.859	0.982	-0.013	0	0	0.011	0	0	0	0	-0.143	-0.073	0.009	0	0.001	-0.001	-0.001	0	0.054	-0.037	0.005	-0.001	0.004	0.001	0	0
4	5	0.859	0	0.626	-0.011	0.012	-0.086	0.012	0.006	0.009	-0.019	0.006	0.04	-0.096	0.011	0	0.003	0	-0.001	0	0.03	-0.023	0	0	0	0	0	0
7	8	0.982	0.626	0	0	-0.003	-0.089	0.016	0.006	0.011	-0.014	0.002	0.004	-0.063	0	0	0	0	0	0	-0.333	0.03	0.001	-0.002	0	0.001	0	0
14	15	-0.013	-0.011	0	0	-8.584	-0.405	-0.049	1.261	-0.372	-0.268	0.275	0	0	0	0	0	0	0	0	0	0	0	0	0	0	0	0
15	16	0	0.012	-0.003	-8.584	0	-0.3	-0.323	0.454	0.072	-0.244	0.079	0	0	0	0	0	0	0	0	0	0	0	0	0	0	0	0
17	18	0	-0.086	-0.089	-0.405	-0.3	0	-12.428	-13.42	0.069	-0.16	-0.221	0	0	0	0	0	0	0	0	0	0	0	0	0	0	0	0
18	19	0.011	0.012	0.016	-0.049	-0.323	-12.428	0	-12.438	3.181	-0.111	-0.02	0	0	0	0	0	0	0	0	0	0	0	0	0	0	0	0
19	20	0	0.006	0.006	1.261	0.454	-13.42	-12.438	0	-0.194	-0.204	-0.187	0	0	0	0	0	0	0	0	0	0	0	0	0	0	0	0
21	22	0	0.009	0.011	-0.372	0.072	0.069	3.181	-0.194	0	-13.198	-11.963	0	0	0	0	0	0	0	0	0	0	0	0	0	0	0	0
22	23	0	-0.019	-0.014	-0.268	-0.244	-0.16	-0.111	-0.204	-13.198	0	-13.767	0	0	0	0	0	0	0	0	0	0	0	0	0	0	0	0
23	24	0	0.006	0.002	0.275	0.079	-0.221	-0.02	-0.187	-11.963	-13.767	0	0	0	0	0	0	0	0	0	0	0	0	0	0	0	0	0
27	28	-0.143	0.04	0.004	0	0	0	0	0	0	0	0	0	4.122	-0.373	-0.21	-0.221	0.002	-0.027	-0.009	0	0	0	0	0	0	0	0
29	30	-0.073	-0.096	-0.063	0	0	0	0	0	0	0	0	4.122	0	2.707	13.659	5.106	0.102	0.067	0.146	0	0	0	0	0	0	0	0
31	32	0.009	0.011	0	0	0	0	0	0	0	0	0	-0.373	2.707	0	-13.074	-14.267	-0.031	-0.016	-0.003	0	0	0	0	0	0	0	0
32	33	0	0	0	0	0	0	0	0	0	0	0	-0.21	13.659	-13.074	0	-11.518	-0.008	-0.007	0.002	0	0	0	0	0	0	0	0
33	34	0.001	0.003	0	0	0	0	0	0	0	0	0	-0.221	5.106	-14.267	-11.518	0	0.058	0.101	0.014	0	0	0	0	0	0	0	0
38	39	-0.001	0	0	0	0	0	0	0	0	0	0	0.002	0.102	-0.031	-0.008	0.058	0	-10.486	-10.277	0	0	0	0	0	0	0	0
39	40	-0.001	-0.001	0	0	0	0	0	0	0	0	0	-0.027	0.067	-0.016	-0.007	0.101	-10.486	0	-10.706	0	0	0	0	0	0	0	0
40	41	0	0	0	0	0	0	0	0	0	0	0	-0.009	0.146	-0.003	0.002	0.014	-10.277	-10.706	0	0	0	0	0	0	0	0	0
44	45	0.054	0.03	-0.333	0	0	0	0	0	0	0	0	0	0	0	0	0	0	0	0	0	8.947	-0.41	-0.152	-0.191	-0.015	-0.008	-0.016
46	47	-0.037	-0.023	0.03	0	0	0	0	0	0	0	0	0	0	0	0	0	0	0	0	8.947	0	2.999	13.736	4.993	0.093	0.084	0.019
48	49	0.005	0	0.001	0	0	0	0	0	0	0	0	0	0	0	0	0	0	0	0	-0.41	2.999	0	-13.04	-13.844	0.024	0	-0.001
49	50	-0.001	0	-0.002	0	0	0	0	0	0	0	0	0	0	0	0	0	0	0	0	-0.152	13.736	-13.04	0	-12.601	-0.023	-0.015	0.008
50	51	0.004	0	0	0	0	0	0	0	0	0	0	0	0	0	0	0	0	0	0	-0.191	4.993	-13.844	-12.601	0	0.087	0.002	-0.009
55	56	0.001	0	0.001	0	0	0	0	0	0	0	0	0	0	0	0	0	0	0	0	-0.015	0.093	0.024	-0.023	0.087	0	-11.052	-10.701
56	57	0	0	0	0	0	0	0	0	0	0	0	0	0	0	0	0	0	0	0	-0.008	0.084	0	-0.015	0.002	-11.052	0	-10.463
57	58	0	0	0	0	0	0	0	0	0	0	0	0	0	0	0	0	0	0	0	-0.016	0.019	-0.001	0.008	-0.009	-10.701	-10.463	0
residual:	0.333
										L2
orca lab		59	62	65	72	73	75	76	77	79	80	81	85	87	89	90	91	96	97	98	102	104	106	107	108	113	114	115
	lab	60	63	66	73	74	76	77	78	80	81	82	86	88	90	91	92	97	98	99	103	105	107	108	109	114	115	116
59	60	0	0.871	0.944	-0.014	0	0	0.012	0	0	0	0	-0.199	0.07	0.002	0.001	-0.016	0	-0.001	0	0.058	-0.064	0.01	-0.001	0.001	0	0	0
62	63	0.871	0	0.657	-0.01	0.009	-0.086	0.012	0.008	0.006	0.009	-0.022	0.043	-0.009	0.007	0.003	-0.015	0	-0.001	0	0.035	-0.044	0	0	0	0	0	0
65	66	0.944	0.657	0	0.002	-0.002	-0.088	0.016	0.008	0.002	0.011	-0.016	0.012	-0.005	0	0	0	0	0	0	-0.301	-0.008	0.006	-0.002	0	0	0	0.001
72	73	-0.014	-0.01	0.002	0	-8.639	-0.399	-0.044	1.198	0.312	-0.385	-0.278	0	0	0	0	0	0	0	0	0	0	0	0	0	0	0	0
73	74	0	0.009	-0.002	-8.639	0	-0.318	-0.347	0.425	0.117	0.067	-0.256	0	0	0	0	0	0	0	0	0	0	0	0	0	0	0	0
75	76	0	-0.086	-0.088	-0.399	-0.318	0	-12.383	-13.334	-0.209	0.026	-0.163	0	0	0	0	0	0	0	0	0	0	0	0	0	0	0	0
76	77	0.012	0.012	0.016	-0.044	-0.347	-12.383	0	-12.522	-0.084	3.214	-0.045	0	0	0	0	0	0	0	0	0	0	0	0	0	0	0	0
77	78	0	0.008	0.008	1.198	0.425	-13.334	-12.522	0	-0.17	-0.154	-0.208	0	0	0	0	0	0	0	0	0	0	0	0	0	0	0	0
79	80	0	0.006	0.002	0.312	0.117	-0.209	-0.084	-0.17	0	-12.206	-13.785	0	0	0	0	0	0	0	0	0	0	0	0	0	0	0	0
80	81	0	0.009	0.011	-0.385	0.067	0.026	3.214	-0.154	-12.206	0	-13.323	0	0	0	0	0	0	0	0	0	0	0	0	0	0	0	0
81	82	0	-0.022	-0.016	-0.278	-0.256	-0.163	-0.045	-0.208	-13.785	-13.323	0	0	0	0	0	0	0	0	0	0	0	0	0	0	0	0	0
85	86	-0.199	0.043	0.012	0	0	0	0	0	0	0	0	0	8.899	-0.126	-0.113	-0.225	0	-0.016	-0.021	0	0	0	0	0	0	0	0
87	88	0.07	-0.009	-0.005	0	0	0	0	0	0	0	0	8.899	0	13.424	3.918	3.245	0.034	0.436	0.471	0	0	0	0	0	0	0	0
89	90	0.002	0.007	0	0	0	0	0	0	0	0	0	-0.126	13.424	0	-12.381	-13.085	0.009	-0.002	0.011	0	0	0	0	0	0	0	0
90	91	0.001	0.003	0	0	0	0	0	0	0	0	0	-0.113	3.918	-12.381	0	-13.157	0.072	-0.053	-0.055	0	0	0	0	0	0	0	0
91	92	-0.016	-0.015	0	0	0	0	0	0	0	0	0	-0.225	3.245	-13.085	-13.157	0	0.005	-0.003	-0.006	0	0	0	0	0	0	0	0
96	97	0	0	0	0	0	0	0	0	0	0	0	0	0.034	0.009	0.072	0.005	0	-10.393	-10.644	0	0	0	0	0	0	0	0
97	98	-0.001	-0.001	0	0	0	0	0	0	0	0	0	-0.016	0.436	-0.002	-0.053	-0.003	-10.393	0	-10.417	0	0	0	0	0	0	0	0
98	99	0	0	0	0	0	0	0	0	0	0	0	-0.021	0.471	0.011	-0.055	-0.006	-10.644	-10.417	0	0	0	0	0	0	0	0	0
102	103	0.058	0.035	-0.301	0	0	0	0	0	0	0	0	0	0	0	0	0	0	0	0	0	7.639	-0.398	-0.173	-0.208	-0.016	-0.019	-0.016
104	105	-0.064	-0.044	-0.008	0	0	0	0	0	0	0	0	0	0	0	0	0	0	0	0	7.639	0	3.232	13.861	4.976	0.149	0.018	0.149
106	107	0.01	0	0.006	0	0	0	0	0	0	0	0	0	0	0	0	0	0	0	0	-0.398	3.232	0	-13.05	-13.902	0.008	-0.001	0.02
107	108	-0.001	0	-0.002	0	0	0	0	0	0	0	0	0	0	0	0	0	0	0	0	-0.173	13.861	-13.05	0	-12.638	-0.02	0.003	-0.026
108	109	0.001	0	0	0	0	0	0	0	0	0	0	0	0	0	0	0	0	0	0	-0.208	4.976	-13.902	-12.638	0	0.023	-0.003	0.097
113	114	0	0	0	0	0	0	0	0	0	0	0	0	0	0	0	0	0	0	0	-0.016	0.149	0.008	-0.02	0.023	0	-10.571	-10.807
114	115	0	0	0	0	0	0	0	0	0	0	0	0	0	0	0	0	0	0	0	-0.019	0.018	-0.001	0.003	-0.003	-10.571	0	-10.522
115	116	0	0	0.001	0	0	0	0	0	0	0	0	0	0	0	0	0	0	0	0	-0.016	0.149	0.02	-0.026	0.097	-10.807	-10.522	0
residual:	0.471
										L1-L2
orca lab		1	4	7	14	15	17	18	19	21	22	23	27	29	31	32	33	38	39	40	44	46	48	49	50	55	56	57
	lab	2	5	8	15	16	18	19	20	22	23	24	28	30	32	33	34	39	40	41	45	47	49	50	51	56	57	58
59	60	-0.001	-0.003	-0.01	-0.004	0	0.002	0	0	-0.078	-0.006	0.002	0.001	0	0	0	0	-0.001	-0.001	-0.003	0	0	0	0	0	0	0	0
62	63	-0.005	-0.011	-0.017	-0.001	0	0	0	0	-0.001	0	0	-0.03	0.001	0	-0.003	-0.002	-0.001	0	0	0	0	0	0	0	0	0	0
65	66	-0.006	-0.013	-0.008	-0.001	0	0	0	0	0	0	0	0.003	0	0	0	0	0	0	-0.001	-0.001	0.002	0.001	0	-0.003	-0.005	-0.006	0.001
72	73	-0.005	-0.002	-0.002	0	0	0	0	0	0	0	0	0.007	-0.001	-0.001	0	-0.001	0	0	0	0.001	0.001	-0.001	0	0	0.041	0.027	0.005
73	74	0	0	-0.002	0	0	0	0	0	0	0	0	-0.003	-0.001	-0.001	0	-0.002	0	0	0	-0.003	0.003	0	0	0	0.05	-0.002	0.006
75	76	0.004	0	0	0	0	0	0	0	0	0	0	0.004	0.005	0.006	0.004	-0.004	0	0	0	0	0	0	0	0	0	0	0
76	77	0	0	0	0	0	0	0	0	0	0	0	-0.002	0	-0.002	-0.007	-0.01	0	0	0	0	0	0	0	0	0	0.001	0
77	78	0.001	0	0	0	0	0	0	0	0	0	0	0.002	0.002	0.001	-0.035	-0.045	0	0	0	0	0	0	0	0	0	0.003	0.001
79	80	0.012	-0.001	0	0	0	0	0	0	0	0	0	-0.016	-0.006	-0.004	-0.003	-0.195	0	0	0	0	0	0	0	0	0	0.002	0.001
80	81	-0.119	-0.002	0	0	0	0	0	0	0	0	0	0.003	-0.001	-0.01	0	-0.028	0	0	0	-0.01	0.001	0	0	0	0	0	0
81	82	-0.026	0	0	0	0	0	0	0	0	0	0	0.017	-0.003	0.02	-0.002	-0.005	0	0	0	-0.003	0	0	0	0	0	0	0
85	86	0.004	-0.009	0.005	0.005	-0.005	0.011	-0.003	0.001	-0.004	0.015	-0.021	0	0	0	0	0	0.005	0.005	0.007	0	0	0	0	0	0	0	0
87	88	-0.001	0.007	-0.001	0	0.002	-0.003	0	-0.001	-0.001	0.004	-0.015	0	-0.001	0	0	0	0.005	-0.03	-0.181	0	0	0	0	0	0	0	0
89	90	0	0	0	0.001	-0.002	0	0	0.001	0.002	-0.019	-0.211	0	0	0	0	0	0.005	0.018	0.006	0	0	0	0	0	0	0	0
90	91	0	0	0	0	-0.001	0	0	0.001	0.001	-0.007	-0.024	0	0	0	0	0	0	-0.001	0	0	0	0	0	0	0	0	0
91	92	0	0.001	0	0	0.001	0	0	0	0	0.006	-0.019	0	0	0	0	0	0.002	-0.002	0.002	0	0	0	0	0	0	0	0
96	97	0	-0.023	0.001	0	0	0	-0.002	-0.002	0	0	0	-0.01	0	0	0	0	-0.001	-0.001	0	0	0	0	0	0	0	0	0
97	98	0.002	0.019	0	0	0	-0.001	-0.003	-0.006	0	0	0	0.001	0	0	0	0	0	0	0	0	0	0	0	0	0	0	0
98	99	0	-0.018	0	0	0.001	-0.003	-0.009	-0.025	0	0	0	-0.002	0.001	0	0	0	0.003	-0.001	0.003	0	0	0	0	0	0	0	0
102	103	0	0	0	0.001	0.004	0	0	0	-0.005	-0.002	0	0	0	0	0	0	0	0	0	-0.006	0.006	0	0	-0.001	0.003	0.002	0.001
104	105	0	0	-0.005	-0.002	0.002	0	0	0	0	0	0	0	0	0	0	0	0	0	0	0.003	0.006	-0.005	-0.003	0.008	-0.001	-0.001	0
106	107	0	0	0	0	0	0	0	0	0	0	0	0	0	0	0	0	0	0	0	0	-0.006	0.003	-0.007	-0.008	0.001	0.001	0
107	108	0	0	0	0	0	0	0	0	0	0	0	0	0	0	0	0	0	0	0	-0.001	-0.008	-0.005	-0.244	-0.056	-0.001	0	0
108	109	0	0	-0.001	0	0	0	0	0	0	0	0	0	0	0	0	0	0	0	0	0.001	0.008	-0.007	-0.056	-0.004	-0.001	0	0
113	114	0	0	-0.005	0.003	-0.015	0	0.001	0.003	0	0	0.001	0	0	0	0	0	0	0	0	0.003	-0.001	0.001	0	0	0	0	0
114	115	0	0	0	-0.002	-0.004	0	0	0	0	0	0	0	0	0	0	0	0	0	0	0.001	0	0	0	0	0	0	0
115	116	0	0	-0.005	0.021	0.005	0	0	0	0	0	0	0	0	0	0	0	0	0	0	0.002	0	0.001	-0.001	0	0	0	0
								residual:	0.244
2-bond
J(15-16)	J(18-19)	J(22-23)	J(32-33)	J(39-40)
-8.6115	-12.7542	-13.0403	-13.0464	-10.5866
3-bond
J(28-30)	J(30-32)
7.40175	7.15467
4-bond
J(2-5)	J(5-8)	J(15-18)	J(16-18)	J(18-22)	J(28-32)
0.914	0.6415	0.116417	-0.09375	0.242222	-0.233333

## Sheet: CONF4
Orca lab.	Lab	sigma	Av(258K)	Av(298K)	C1(shift(TMS))	C2(shift(TMS))	ExpSh(258K)	ExpSh(298K)	CalSh(258K)	CalSh(298K)			Orca lab.	Lab	sigma	Av(sigma)	C(shift(TMS))	E(shift)	C(shift)
1H	1H	1H	1H	1H	1H	1H	1H	1H	1H	1H			13C	13C	13C	13C	13C	13C	13C
1	2	22.533	22.491	22.491	9.241	9.241	8.22	8.29	8.46576	8.54867			0	1	44.119	43.2275	147.071	129.679	130.28
4	5	23.236	22.9625	22.9625	8.7695	8.7695	8.19	8.29	8.01977	8.09452			2	3	43.017	40.3513	149.947	134.903	132.952
7	8	22.623											3	4	46.847	43.7192	146.579	129.083	129.824
14	15	27.107	27.0045	26.9637	4.7275	4.76825	4.19	4.16	4.19644	4.24052			5	6	47.188	47.2375	143.06	128.334	126.556
15	16	26.954	26.923		4.809		4.17		4.27353				6	7	41.324
17	18	29.8	29.8145	29.8145	1.9175	1.9175	1.42	1.41	1.53846	1.49467			8	9	37.65
18	19	30.096											10	11	8.198	7.589	182.709	161.781	163.381
19	20	30.096											12	13	109.434	110.268	80.0295	67.472	68.0126
21	22	29.27	29.8108	29.8108	1.92117	1.92117	1.53	1.465	1.54193	1.49821			13	14	98.316	98.4	91.898	79.352	79.0361
22	23	29.892											16	17	154.418	155.471	34.8275	27.002	26.029
23	24	29.403											20	21	155.945
27	28	22.699	22.0645	22.0645	9.6675	9.6675	8.12	7.615	8.86919	8.95947			24	25	11	6.718	183.58	166.965	164.19
29	30	26.81	26.6037	26.6037	5.12825	5.12825	4.86	4.84	4.57551	4.58727			28	29	129.255	129.165	61.1327	48.85	50.4613
31	32	30.498	29.7568	29.7568	1.97517	1.97517	1.61	1.57	1.59301	1.55022			30	31	169.085	167.28	23.0183	15.823	15.0606
32	33	29.874											34	35	-3.723	-5.3225	195.62	173.23	175.374
33	34	29.407											37	38	127.235	126.77	63.5283	51.445	52.6863
38	39	27.319	27.4091	27.4091	4.32292	4.32292	3.82	3.81	3.81375	3.81157			41	42	2.778
39	40	27.301											45	46	128.461			MAE:	1.31034
40	41	27.548						MAE(C-H):	0.107122	0.115829			47	48	167.618
44	45	20.843						AE(N-H):	0.749189	1.34447			51	52	-5.048
46	47	27.048											54	55	125.992
48	49	29.658
49	50	29.184											58	59	42.336
50	51	30.105											60	61	39.093
55	56	27.497											61	62	40.681
56	57	27.509											63	64	47.287
57	58	27.234											64	65	46.025
													66	67	41.645
59	60	22.449											68	69	6.98
62	63	22.722											70	71	111.103
65	66	23.269											71	72	98.484
72	73	26.902											74	75	156.456
73	74	26.892											78	79	155.063
75	76	29.461											82	83	2.923
76	77	29.607											86	87	127.478
77	78	29.827											88	89	166.002
79	80	30.12											92	93	-8.23
80	81	30.113											95	96	127.115
81	82	30.067											99	100	10.171
85	86	21.413											103	104	131.467
87	88	26.724											105	106	166.414
89	90	29.698											109	110	-4.289
90	91	29.6											112	113	126.737
91	92	29.318
96	97	27.384
97	98	27.457
98	99	27.472
102	103	23.303
104	105	25.833
106	107	30.324
107	108	29.615
108	109	29.801
113	114	27.266
114	115	27.502
115	116	27.42
										L1
orca lab		1	4	7	14	15	17	18	19	21	22	23	27	29	31	32	33	38	39	40	44	46	48	49	50	55	56	57
	Lab.	2	5	8	15	16	18	19	20	22	23	24	28	30	32	33	34	39	40	41	45	47	49	50	51	56	57	58
1	2	0	0.929	0.849	-0.012	0	0	0	0.012	0	0	0	0.062	0.024	0.006	-0.021	0.004	0	0	-0.001	-0.144	0.03	-0.02	0.001	0.001	0	0	0
4	5	0.929	0	0.679	-0.008	0.007	0.009	-0.082	0.013	0.01	-0.024	0.006	-0.306	0.058	0.002	-0.028	0	-0.001	0	-0.001	-0.005	-0.002	0	0	0	0	0	0
7	8	0.849	0.679	0	0.004	-0.006	0.009	-0.086	0.016	0.012	-0.022	0.002	0.036	0	0.004	0	0.003	0	0	0	0.029	0.007	-0.022	0.002	0.004	0.001	0	0.001
14	15	-0.012	-0.008	0.004	0	-9.166	1.308	-0.402	-0.054	-0.391	-0.265	0.313	0.001	0	0	0	0	0	0	0	0	0	0	0	0	0	0	0
15	16	0	0.007	-0.006	-9.166	0	0.49	-0.297	-0.318	0.097	-0.235	0.118	0	0	0	0	0	0	0	0	0	0	0	0	0	0	0	0
17	18	0	0.009	0.009	1.308	0.49	0	-13.454	-12.461	-0.153	-0.206	-0.174	0	0	0	0	0	0	0	0	0	0	0	0	0	0	0	0
18	19	0	-0.082	-0.086	-0.402	-0.297	-13.454	0	-12.538	0.022	-0.158	-0.212	0.002	0	0	0	0	0	0	0	0	0	0	0	0	0	0	0
19	20	0.012	0.013	0.016	-0.054	-0.318	-12.461	-12.538	0	3.218	-0.055	-0.093	0	0	0	0	0	0	0	0	0	0	0	0	0	0	0	0
21	22	0	0.01	0.012	-0.391	0.097	-0.153	0.022	3.218	0	-13.316	-12.265	0	0	0	0	0	0	0	0	0	0	0	0	0	0	0	0
22	23	0	-0.024	-0.022	-0.265	-0.235	-0.206	-0.158	-0.055	-13.316	0	-13.681	0	0	0	0	0	0	0	0	0	0	0	0	0	0	0	0
23	24	0	0.006	0.002	0.313	0.118	-0.174	-0.212	-0.093	-12.265	-13.681	0	0	0	0	0	0	0	0	0	0	0	0	0	0	0	0	0
27	28	0.062	-0.306	0.036	0.001	0	0	0.002	0	0	0	0	0	7.082	-0.183	-0.088	-0.287	-0.005	-0.011	-0.032	0	0	0	0	0	0	0	0
29	30	0.024	0.058	0	0	0	0	0	0	0	0	0	7.082	0	3.892	3.593	13.238	0.471	0.045	0.617	0	0	0	0	0	0	0	0
31	32	0.006	0.002	0.004	0	0	0	0	0	0	0	0	-0.183	3.892	0	-13.274	-12.027	-0.063	0.067	-0.058	0	0	0	0	0	0	0	0
32	33	-0.021	-0.028	0	0	0	0	0	0	0	0	0	-0.088	3.593	-13.274	0	-13.062	-0.007	0.008	-0.003	0	0	0	0	0	0	0	0
33	34	0.004	0	0.003	0	0	0	0	0	0	0	0	-0.287	13.238	-12.027	-13.062	0	0.004	0	0.005	0	0	0	0	0	0	0	0
38	39	0	-0.001	0	0	0	0	0	0	0	0	0	-0.005	0.471	-0.063	-0.007	0.004	0	-10.63	-10.327	0	0	0	0	0	0	0	0
39	40	0	0	0	0	0	0	0	0	0	0	0	-0.011	0.045	0.067	0.008	0	-10.63	0	-10.223	0	0	0	0	0	0	0	0
40	41	-0.001	-0.001	0	0	0	0	0	0	0	0	0	-0.032	0.617	-0.058	-0.003	0.005	-10.327	-10.223	0	0	0	0	0	0	0	0	0
44	45	-0.144	-0.005	0.029	0	0	0	0	0	0	0	0	0	0	0	0	0	0	0	0	0	7.213	0.273	-0.381	-0.169	-0.034	-0.013	-0.03
46	47	0.03	-0.002	0.007	0	0	0	0	0	0	0	0	0	0	0	0	0	0	0	0	7.213	0	4.055	13.216	3.703	0.627	0.042	0.499
48	49	-0.02	0	-0.022	0	0	0	0	0	0	0	0	0	0	0	0	0	0	0	0	0.273	4.055	0	-12.84	-13.395	0	-0.004	-0.006
49	50	0.001	0	0.002	0	0	0	0	0	0	0	0	0	0	0	0	0	0	0	0	-0.381	13.216	-12.84	0	-12.616	-0.009	0.014	-0.024
50	51	0.001	0	0.004	0	0	0	0	0	0	0	0	0	0	0	0	0	0	0	0	-0.169	3.703	-13.395	-12.616	0	0.04	0.021	-0.017
55	56	0	0	0.001	0	0	0	0	0	0	0	0	0	0	0	0	0	0	0	0	-0.034	0.627	0	-0.009	0.04	0	-10.526	-11.094
56	57	0	0	0	0	0	0	0	0	0	0	0	0	0	0	0	0	0	0	0	-0.013	0.042	-0.004	0.014	0.021	-10.526	0	-10.733
57	58	0	0	0.001	0	0	0	0	0	0	0	0	0	0	0	0	0	0	0	0	-0.03	0.499	-0.006	-0.024	-0.017	-11.094	-10.733	0
residual:	0.627
										L2
orca lab		59	62	65	72	73	75	76	77	79	80	81	85	87	89	90	91	96	97	98	102	104	106	107	108	113	114	115
	lab	60	63	66	73	74	76	77	78	80	81	82	86	88	90	91	92	97	98	99	103	105	107	108	109	114	115	116
59	60	0	0.862	0.925	0	-0.01	0	0	0	0.013	0	0	-0.152	-0.063	0.011	0	0.002	0	0	0	0.059	-0.008	0.004	-0.016	0.006	-0.001	-0.001	0
62	63	0.862	0	0.699	-0.009	0.005	0.012	0.002	-0.016	0.017	-0.094	0.008	0.032	-0.084	0.011	0	0.003	0	0	0	0.03	0	0.003	0	0	0	0	0
65	66	0.925	0.699	0	0.01	-0.012	0.009	0.006	-0.018	0.013	-0.088	0.006	0.001	-0.056	0	0	0	0	0	0	-0.329	0.084	0.001	-0.019	0.001	0	-0.001	0
72	73	0	-0.009	0.01	0	-8.736	0.052	-0.063	-0.221	-0.315	-0.289	0.461	0	0	0	0	0	0	0	0	0	0	0	0	0	0	0	0
73	74	-0.01	0.005	-0.012	-8.736	0	-0.39	0.184	-0.265	-0.084	-0.429	1.474	0	0	0	0	0	0	0	0	0	0	0	0	0	0	0	0
75	76	0	0.012	0.009	0.052	-0.39	0	-12.178	-13.226	3.201	0.087	-0.21	0	0	0	0	0	0	0	0	0	0	0	0	0	0	0	0
76	77	0	0.002	0.006	-0.063	0.184	-12.178	0	-13.706	-0.033	-0.22	-0.194	0	0	0	0	0	0	0	0	0	0	0	0	0	0	0	0
77	78	0	-0.016	-0.018	-0.221	-0.265	-13.226	-13.706	0	-0.097	-0.134	-0.185	0	0	0	0	0	0	0	0	0	0	0	0	0	0	0	0
79	80	0.013	0.017	0.013	-0.315	-0.084	3.201	-0.033	-0.097	0	-12.379	-12.561	0	0	0	0	0	0	0	0	0	0	0	0	0	0	0	0
80	81	0	-0.094	-0.088	-0.289	-0.429	0.087	-0.22	-0.134	-12.379	0	-13.238	0	0	0	0	0	0	0	0	0.001	0	0	0	0	0	0	0
81	82	0	0.008	0.006	0.461	1.474	-0.21	-0.194	-0.185	-12.561	-13.238	0	0	0	0	0	0	0	0	0	0	0	0	0	0	0	0	0
85	86	-0.152	0.032	0.001	0	0	0	0	0	0	0	0	0	5.392	-0.373	-0.181	-0.222	-0.033	-0.024	-0.022	0	0	0	0	0	0	0	0
87	88	-0.063	-0.084	-0.056	0	0	0	0	0	0	0	0	5.392	0	2.987	13.568	4.706	0.079	0.107	0.031	0	0	0	0	0	0	0	0
89	90	0.011	0.011	0	0	0	0	0	0	0	0	0	-0.373	2.987	0	-13.043	-14.292	0.022	0.004	-0.002	0	0	0	0	0	0	0	0
90	91	0	0	0	0	0	0	0	0	0	0	0	-0.181	13.568	-13.043	0	-11.603	-0.023	-0.023	0.003	0	0	0	0	0	0	0	0
91	92	0.002	0.003	0	0	0	0	0	0	0	0	0	-0.222	4.706	-14.292	-11.603	0	0.07	0.019	0.007	0	0	0	0	0	0	0	0
96	97	0	0	0	0	0	0	0	0	0	0	0	-0.033	0.079	0.022	-0.023	0.07	0	-10.234	-10.548	0	0	0	0	0	0	0	0
97	98	0	0	0	0	0	0	0	0	0	0	0	-0.024	0.107	0.004	-0.023	0.019	-10.234	0	-11.022	0	0	0	0	0	0	0	0
98	99	0	0	0	0	0	0	0	0	0	0	0	-0.022	0.031	-0.002	0.003	0.007	-10.548	-11.022	0	0	0	0	0	0	0	0	0
102	103	0.059	0.03	-0.329	0	0	0	0	0	0	0.001	0	0	0	0	0	0	0	0	0	0	9.694	-0.148	-0.333	-0.114	0.005	-0.01	-0.013
104	105	-0.008	0	0.084	0	0	0	0	0	0	0	0	0	0	0	0	0	0	0	0	9.694	0	4.407	3.264	12.994	0.04	0.652	0.6
106	107	0.004	0.003	0.001	0	0	0	0	0	0	0	0	0	0	0	0	0	0	0	0	-0.148	4.407	0	-13.149	-12.098	0.058	-0.064	-0.07
107	108	-0.016	0	-0.019	0	0	0	0	0	0	0	0	0	0	0	0	0	0	0	0	-0.333	3.264	-13.149	0	-12.849	0.01	-0.002	-0.01
108	109	0.006	0	0.001	0	0	0	0	0	0	0	0	0	0	0	0	0	0	0	0	-0.114	12.994	-12.098	-12.849	0	-0.002	0.005	-0.004
113	114	-0.001	0	0	0	0	0	0	0	0	0	0	0	0	0	0	0	0	0	0	0.005	0.04	0.058	0.01	-0.002	0	-9.914	-11.295
114	115	-0.001	0	-0.001	0	0	0	0	0	0	0	0	0	0	0	0	0	0	0	0	-0.01	0.652	-0.064	-0.002	0.005	-9.914	0	-10.137
115	116	0	0	0	0	0	0	0	0	0	0	0	0	0	0	0	0	0	0	0	-0.013	0.6	-0.07	-0.01	-0.004	-11.295	-10.137	0
residual:	0.652
										L1-L2
orca lab		1	4	7	14	15	17	18	19	21	22	23	27	29	31	32	33	38	39	40	44	46	48	49	50	55	56	57
	lab	2	5	8	15	16	18	19	20	22	23	24	28	30	32	33	34	39	40	41	45	47	49	50	51	56	57	58
59	60	0.001	-0.015	0.002	-0.003	0.003	0.001	0.003	0.002	-0.125	-0.022	0.005	0	0	0	0	0	0	0.001	0.001	0.005	-0.001	0	0	0	0	0	0
62	63	0.002	-0.02	-0.004	0	0	0	0	0	-0.001	0	-0.001	-0.006	0.003	0	0.003	0	-0.001	-0.064	0.005	0.007	-0.001	0	0	0	0	0	0
65	66	-0.01	-0.016	-0.011	-0.001	0	0	0	0	-0.001	0	0	0	0	0	0	0	0	0	0	-0.028	0.001	0	0	0	0	0	0
72	73	0.002	0	0	0	0	0	0	0	0	0	0	0.001	0	0	0	0	-0.024	-0.006	0.007	0.001	0.003	0	0	0	0	0	0
73	74	-0.005	-0.001	-0.001	0	0	0	0	0	0	0	0	0.001	-0.001	0	0	0	-0.037	-0.008	-0.004	0.002	0	0	0.001	0.001	0	0	0
75	76	-0.086	-0.001	-0.003	0	0	0	0	0	0	0	0	-0.001	0	0	0	0	0	0	0	0.004	-0.004	0	0	-0.003	0	0	0
76	77	-0.001	0	-0.001	0	0	0	0	0	0	0	0	0	0	0	0	0	0	0	0	-0.025	-0.062	-0.001	-0.011	-0.06	0.001	0	0
77	78	-0.008	0	0	0	0	0	0	0	0	0	0	-0.001	0	0	0	0	0	0	0	0.033	-0.011	0.001	-0.003	-0.006	0	0	0
79	80	0	0	0	0	0	0	0	0	0	0	0	0	0	0	0	0	0	0	0	-0.005	-0.003	0	0	0	0	0	0
80	81	0.004	0	0	0	0	0	0	0	0	0	0	0	0	0	0	0	0	0	0	0.018	-0.005	0	0.001	0	0	0	0
81	82	0	0	0	0	0	0	0	0	0	0	0	0	0	0	0	0	0.001	0	0	0.001	-0.027	0	0.001	0	0	0	0
85	86	0	-0.045	0.002	0.007	0.002	0.002	0.003	-0.001	0.004	0.012	-0.026	0.001	0	0	0	0	0	0	0	0	0	0	0	0	0	0	0
87	88	0	-0.01	0	-0.001	-0.002	-0.003	0.011	-0.002	-0.001	-0.003	-0.006	0.001	-0.015	0	0.001	0	0	0	0	0	0	0	0	0	0	0	0
89	90	0	0	0	-0.001	-0.001	-0.017	0.009	-0.002	-0.009	0.005	-0.019	0	-0.001	0	0	0	0	0	0	0	0	0	0	0	0	0	0
90	91	0	-0.001	0	-0.001	0	-0.203	-0.009	-0.016	0	0.002	0.015	0	0	0	0	0	0	0	0	0	0	0	0	0	0	0	0
91	92	0	-0.002	0	-0.001	-0.001	-0.092	-0.011	-0.009	-0.027	-0.012	-0.159	-0.002	0.001	0	0	0	0	0	0	0	0	0	0	0	0	0	0
96	97	0	0	0	0	0	0	0	0	0	0	0	-0.001	0.002	0	0	-0.001	0	0	0	0	0	0	0	0	0	0	0
97	98	0	0	0	0	0	0	0	0	0	0	0	0.001	-0.079	0	0.001	0.006	0	0	0	0	0	0	0	0	0	0	0
98	99	0	0	0	0	0	0	0	0	0	0	0	0.002	-0.027	0.001	0.001	0.007	0	0	0	0	0	0	0	0	0	0	0
102	103	-0.001	0	-0.001	0	-0.001	0	0	0	-0.005	-0.001	0	0	0	0	0	0	0	0	0	0.001	-0.001	0	0	0.003	0.001	0.001	0.001
104	105	0	0	0.006	-0.006	0	0	0	0	0	0	0	0	0	0	0	0	0	0	0	-0.001	0	0	0	0	0.011	0.013	-0.003
106	107	0	0	0.001	0	0	0	0	0	0	0	0	0	0	0	0	0	0	0	0	0	0	0	0	0	-0.004	0.003	0.001
107	108	0	0	0.003	0	0	0	0	0	0	0	0	0	0	0	0	0	0	0	0	0	0	0	0	0	-0.005	-0.003	0.001
108	109	0	0	0	0	0	0	0	0	0	0	0	0	0	0	0	0	0	0	0	0	0.001	0	0	-0.001	-0.029	-0.001	0
113	114	0	0	-0.045	0	0	0	0	0	0	0	0	0	0	0	0	0	0	0	0	0.005	0	0	0	0	-0.002	-0.001	-0.01
114	115	-0.001	-0.001	0.013	0	0	0	0	0	0	0	0	0	0	0	0	0	0	0	0	0.014	-0.001	0	0	0	-0.006	-0.001	-0.019
115	116	-0.001	-0.001	-0.003	0	0	0	0	0	0	0	0	0	0	0	0	0	0	0	0	0.007	-0.001	0	0	0	-0.02	-0.008	-0.096
								residual:	0.203
2-bond
J(15-16)	J(18-19)	J(22-23)	J(32-33)	J(39-40)
-8.951	-12.9272	-12.9067	-12.854	-10.5569
3-bond
J(28-30)	J(30-32)
7.34525	6.96858
4-bond
J(2-5)	J(5-8)	J(15-18)	J(16-18)	J(18-22)	J(28-32)
0.89125	0.689	0.130083	-0.0901667	0.244667	-0.183833

## Sheet: CONF5
Orca lab.	Lab	sigma	Av(258K)	Av(298K)	C1(shift(TMS))	C2(shift(TMS))	ExpSh(258K)	ExpSh(298K)	CalSh(258K)	CalSh(298K)			Orca lab.	Lab	sigma	Av(sigma)	C(shift(TMS))	E(shift)	C(shift)
1H	1H	1H	1H	1H	1H	1H	1H	1H	1H	1H			13C	13C	13C	13C	13C	13C	13C
1	2	22.436	22.5225	22.5225	9.2095	9.2095	8.22	8.29	8.41406	8.49017			0	1	39.985	42.018	148.28	129.679	131.299
4	5	23.123	23.0083	23.0083	8.72375	8.72375	8.19	8.29	7.95653	8.02439			2	3	39.122	40.8302	149.468	134.903	132.4
7	8	22.817											3	4	46.191	44.2787	146.019	129.083	129.204
14	15	26.857	26.9305	27.0062	4.8015	4.72575	4.19	4.16	4.26216	4.19071			5	6	46.943	46.698	143.6	128.334	126.961
15	16	27.031	27.082		4.65		4.17		4.11946	30.087			6	7	44.629
17	18	30.124	29.9605	29.9605	1.7715	1.7715	1.42	1.41	1.40821	1.35788			8	9	40.78
18	19	30.126											10	11	7.957	8.9295	181.369	161.781	161.972
19	20	29.878											12	13	109.398	109.942	80.356	67.472	68.3338
21	22	28.899	29.8208	29.8208	1.91117	1.91117	1.53	1.465	1.53976	1.4918			13	14	98.779	98.8355	91.4625	79.352	78.6295
22	23	29.903											16	17	154.321	155.698	34.6002	27.002	25.9182
23	24	29.439											20	21	156.869
27	28	23.873	22.63	22.63	9.102	9.102	8.12	7.615	8.3128	8.38709			24	25	9.266	6.80675	183.491	166.965	163.94
29	30	25.834	26.2392	26.2392	5.49275	5.49275	4.86	4.84	4.91325	4.92618			28	29	132.022	130.067	60.2312	48.85	49.6781
31	32	29.87	29.7431	29.7431	1.98892	1.98892	1.61	1.57	1.61299	1.56636			30	31	167.006	166.68	23.6182	15.823	15.7379
32	33	30.065											34	35	-4.054	-7.14975	197.448	173.23	176.878
33	34	29.46											37	38	128.042	126.613	63.6852	51.445	52.88
38	39	27.553	27.4285	27.4285	4.3035	4.3035	3.82	3.81	3.7931	3.78581			41	42	8.128
39	40	27.609											45	46	131.673			MAE:	1.34592
40	41	27.734						MAE(C-H):	0.0727691	0.0861792			47	48	165.729
44	45	22.784						AE(N-H):	0.192803	0.772093			51	52	-8.191
46	47	25.82											54	55	126.548
48	49	29.917
49	50	29.726											58	59	44.051
50	51	29.911											60	61	39.271
55	56	27.508											61	62	41.931
56	57	27.013											63	64	46.453
57	58	27.403											64	65	44.364
													66	67	44.148
59	60	22.609											68	69	9.902
62	63	23.131											70	71	110.486
65	66	22.962											71	72	98.892
72	73	27.004											74	75	156.891
73	74	27.133											78	79	154.71
75	76	29.587											82	83	2.611
76	77	29.976											86	87	127.743
77	78	30.072											88	89	166.158
79	80	30.199											92	93	-7.822
80	81	30.272											95	96	125.199
81	82	30.213											99	100	7.222
85	86	21.478											103	104	128.829
87	88	26.83											105	106	167.826
89	90	29.339											109	110	-8.532
90	91	29.757											112	113	126.662
91	92	29.656
96	97	27.524
97	98	27.689
98	99	27.158
102	103	22.385
104	105	26.473
106	107	29.811
107	108	29.609
108	109	29.796
113	114	27.173
114	115	27.395
115	116	27.383
										L1
orca lab		1	4	7	14	15	17	18	19	21	22	23	27	29	31	32	33	38	39	40	44	46	48	49	50	55	56	57
	Lab.	2	5	8	15	16	18	19	20	22	23	24	28	30	32	33	34	39	40	41	45	47	49	50	51	56	57	58
1	2	0	0.964	1.033	-0.011	0	0	0.012	0	0	0	0	0.059	-0.001	0.002	0.004	-0.002	0	0	0	0.052	-0.009	0.001	0.003	0.006	0.001	0.001	0
4	5	0.964	0	0.533	-0.014	0.011	-0.082	0.012	0.007	0.009	-0.02	0.006	-0.331	0.098	-0.001	0.001	-0.009	0	0	0	0.023	0	0	0	0	0	0	0
7	8	1.033	0.533	0	0	-0.005	-0.086	0.016	0.007	0.012	-0.016	0.001	0.027	0.007	0	0	0	0	0	0	-0.364	0.08	-0.005	0	0.001	0.001	0	0
14	15	-0.011	-0.014	0	0	-8.499	-0.408	-0.077	1.304	-0.384	-0.26	0.306	0	0	0	0	0	0	0	0	0	0	0	0	0	0	0	0
15	16	0	0.011	-0.005	-8.499	0	-0.302	-0.323	0.464	0.083	-0.233	0.046	0	0	0	0	0	0	0	0	0	0	0	0	0	0	0	0
17	18	0	-0.082	-0.086	-0.408	-0.302	0	-12.443	-13.401	0.043	-0.154	-0.214	0.001	0	0	0	0	0	0	0	0	0	0	0	0	0	0	0
18	19	0.012	0.012	0.016	-0.077	-0.323	-12.443	0	-12.49	3.186	-0.067	-0.085	0	0	0	0	0	0	0	0	0	0	0	0	0	0	0	0
19	20	0	0.007	0.007	1.304	0.464	-13.401	-12.49	0	-0.17	-0.206	-0.19	0	0	0	0	0	0	0	0	0	0	0	0	0	0	0	0
21	22	0	0.009	0.012	-0.384	0.083	0.043	3.186	-0.17	0	-13.293	-12.179	0	0	0	0	0	0	0	0	0	0	0	0	0	0	0	0
22	23	0	-0.02	-0.016	-0.26	-0.233	-0.154	-0.067	-0.206	-13.293	0	-13.717	0	0	0	0	0	0	0	0	0	0	0	0	0	0	0	0
23	24	0	0.006	0.001	0.306	0.046	-0.214	-0.085	-0.19	-12.179	-13.717	0	0	0	0	0	0	0	0	0	0	0	0	0	0	0	0	0
27	28	0.059	-0.331	0.027	0	0	0.001	0	0	0	0	0	0	10.342	-0.12	-0.147	-0.394	-0.008	-0.011	0.003	0	0	0	0	0	0	0	0
29	30	-0.001	0.098	0.007	0	0	0	0	0	0	0	0	10.342	0	13.076	5.361	2.684	0.596	0.578	0.042	0	0	0	0	0	0	0	0
31	32	0.002	-0.001	0	0	0	0	0	0	0	0	0	-0.12	13.076	0	-12.459	-13.004	0.009	-0.005	-0.006	0	0	0	0	0	0	0	0
32	33	0.004	0.001	0	0	0	0	0	0	0	0	0	-0.147	5.361	-12.459	0	-13.492	-0.069	-0.072	0.046	0	0	0	0	0	0	0	0
33	34	-0.002	-0.009	0	0	0	0	0	0	0	0	0	-0.394	2.684	-13.004	-13.492	0	-0.004	-0.012	0.014	0	0	0	0	0	0	0	0
38	39	0	0	0	0	0	0	0	0	0	0	0	-0.008	0.596	0.009	-0.069	-0.004	0	-10.408	-10.348	0	0	0	0	0	0	0	0
39	40	0	0	0	0	0	0	0	0	0	0	0	-0.011	0.578	-0.005	-0.072	-0.012	-10.408	0	-10.596	0	0	0	0	0	0	0	0
40	41	0	0	0	0	0	0	0	0	0	0	0	0.003	0.042	-0.006	0.046	0.014	-10.348	-10.596	0	0	0	0	0	0	0	0	0
44	45	0.052	0.023	-0.364	0	0	0	0	0	0	0	0	0	0	0	0	0	0	0	0	0	10.698	-0.426	-0.114	-0.17	-0.003	-0.008	-0.005
46	47	-0.009	0	0.08	0	0	0	0	0	0	0	0	0	0	0	0	0	0	0	0	10.698	0	2.872	13.622	4.994	0.098	0.093	0.028
48	49	0.001	0	-0.005	0	0	0	0	0	0	0	0	0	0	0	0	0	0	0	0	-0.426	2.872	0	-12.824	-13.65	0.027	0.006	-0.001
49	50	0.003	0	0	0	0	0	0	0	0	0	0	0	0	0	0	0	0	0	0	-0.114	13.622	-12.824	0	-12.629	-0.022	-0.014	0.007
50	51	0.006	0	0.001	0	0	0	0	0	0	0	0	0	0	0	0	0	0	0	0	-0.17	4.994	-13.65	-12.629	0	0.09	0.011	-0.006
55	56	0.001	0	0.001	0	0	0	0	0	0	0	0	0	0	0	0	0	0	0	0	-0.003	0.098	0.027	-0.022	0.09	0	-10.889	-10.637
56	57	0.001	0	0	0	0	0	0	0	0	0	0	0	0	0	0	0	0	0	0	-0.008	0.093	0.006	-0.014	0.011	-10.889	0	-10.415
57	58	0	0	0	0	0	0	0	0	0	0	0	0	0	0	0	0	0	0	0	-0.005	0.028	-0.001	0.007	-0.006	-10.637	-10.415	0
residual:	0.596
										L2
orca lab		59	62	65	72	73	75	76	77	79	80	81	85	87	89	90	91	96	97	98	102	104	106	107	108	113	114	115
	lab	60	63	66	73	74	76	77	78	80	81	82	86	88	90	91	92	97	98	99	103	105	107	108	109	114	115	116
59	60	0	0.845	0.972	0	0.008	0	0	0	0	0.014	0	-0.134	-0.069	0.002	0.01	0	0	0	0	0.058	-0.063	0.009	-0.001	0.001	0	0	0
62	63	0.845	0	0.643	-0.028	0.011	0.016	0.004	-0.035	0.01	0.018	-0.079	0.033	-0.085	0.004	0.011	0	0	0	0.001	0.034	-0.042	0	0	0	0	0	0
65	66	0.972	0.643	0	-0.023	0.002	0.011	0.007	-0.029	0.009	0.014	-0.073	-0.001	-0.059	0	0	0	0	0	0	-0.296	-0.007	0.006	-0.002	0	0	0	0.001
72	73	0	-0.028	-0.023	0	-9.213	0.044	-0.051	-0.226	0.489	-0.3	-0.295	0	0	0	0	0	0	0	0	0.001	0	0	0	0	0	0	0
73	74	0.008	0.011	0.002	-9.213	0	-0.361	0.196	-0.24	1.515	-0.086	-0.433	0	0	0	0	0	0	0	0	0	0	0	0	0	0	0	0
75	76	0	0.016	0.011	0.044	-0.361	0	-12.863	-12.79	-0.213	3.189	0.108	0	0	0	0	0	0	0	0	0	0	0	0	0	0	0	0
76	77	0	0.004	0.007	-0.051	0.196	-12.863	0	-13.452	-0.197	0.018	-0.222	0	0	0	0	0	0	0	0	0	0	0	0	0	0	0	0
77	78	0	-0.035	-0.029	-0.226	-0.24	-12.79	-13.452	0	-0.175	-0.122	-0.132	0	0	0	0	0	0	0	0	0	0	0	0	0	0	0	0
79	80	0	0.01	0.009	0.489	1.515	-0.213	-0.197	-0.175	0	-12.492	-13.128	0	0	0	0	0	0	0	0	0	0	0	0	0	0	0	0
80	81	0.014	0.018	0.014	-0.3	-0.086	3.189	0.018	-0.122	-12.492	0	-12.279	0	0	0	0	0	0	0	0	0	0	0	0	0	0	0	0
81	82	0	-0.079	-0.073	-0.295	-0.433	0.108	-0.222	-0.132	-13.128	-12.279	0	0	0	0	0	0	0	0	0	0.001	0	0	0	0	0	0	0
85	86	-0.134	0.033	-0.001	0	0	0	0	0	0	0	0	0	5.175	-0.222	-0.383	-0.21	-0.02	-0.034	-0.026	0	0	0	0	0	0	0	0
87	88	-0.069	-0.085	-0.059	0	0	0	0	0	0	0	0	5.175	0	5.127	2.763	13.549	0.005	0.139	0.106	0	0	0	0	0	0	0	0
89	90	0.002	0.004	0	0	0	0	0	0	0	0	0	-0.222	5.127	0	-14.341	-11.5	-0.005	0.09	0.016	0	0	0	0	0	0	0	0
90	91	0.01	0.011	0	0	0	0	0	0	0	0	0	-0.383	2.763	-14.341	0	-13.069	-0.001	0.026	0.007	0	0	0	0	0	0	0	0
91	92	0	0	0	0	0	0	0	0	0	0	0	-0.21	13.549	-11.5	-13.069	0	0.004	-0.028	-0.021	0	0	0	0	0	0	0	0
96	97	0	0	0	0	0	0	0	0	0	0	0	-0.02	0.005	-0.005	-0.001	0.004	0	-10.587	-10.679	0	0	0	0	0	0	0	0
97	98	0	0	0	0	0	0	0	0	0	0	0	-0.034	0.139	0.09	0.026	-0.028	-10.587	0	-10.966	0	0	0	0	0	0	0	0
98	99	0	0.001	0	0	0	0	0	0	0	0	0	-0.026	0.106	0.016	0.007	-0.021	-10.679	-10.966	0	0	0	0	0	0	0	0	0
102	103	0.058	0.034	-0.296	0.001	0	0	0	0	0	0	0.001	0	0	0	0	0	0	0	0	0	7.415	-0.396	-0.163	-0.211	-0.017	-0.018	-0.015
104	105	-0.063	-0.042	-0.007	0	0	0	0	0	0	0	0	0	0	0	0	0	0	0	0	7.415	0	3.508	13.936	4.741	0.175	0.022	0.167
106	107	0.009	0	0.006	0	0	0	0	0	0	0	0	0	0	0	0	0	0	0	0	-0.396	3.508	0	-13.031	-13.902	0.012	-0.001	0.017
107	108	-0.001	0	-0.002	0	0	0	0	0	0	0	0	0	0	0	0	0	0	0	0	-0.163	13.936	-13.031	0	-12.673	-0.023	0	-0.026
108	109	0.001	0	0	0	0	0	0	0	0	0	0	0	0	0	0	0	0	0	0	-0.211	4.741	-13.902	-12.673	0	0.032	0	0.096
113	114	0	0	0	0	0	0	0	0	0	0	0	0	0	0	0	0	0	0	0	-0.017	0.175	0.012	-0.023	0.032	0	-10.572	-10.695
114	115	0	0	0	0	0	0	0	0	0	0	0	0	0	0	0	0	0	0	0	-0.018	0.022	-0.001	0	0	-10.572	0	-10.498
115	116	0	0	0.001	0	0	0	0	0	0	0	0	0	0	0	0	0	0	0	0	-0.015	0.167	0.017	-0.026	0.096	-10.695	-10.498	0
residual:	0.296
										L1-L2
orca lab		1	4	7	14	15	17	18	19	21	22	23	27	29	31	32	33	38	39	40	44	46	48	49	50	55	56	57
	lab	2	5	8	15	16	18	19	20	22	23	24	28	30	32	33	34	39	40	41	45	47	49	50	51	56	57	58
59	60	0.002	-0.01	-0.003	-0.003	0.002	0.003	0.001	0	-0.113	-0.015	0.007	0	0	-0.001	-0.001	0	0	0	0	0	0	0	0	0	0	0	0
62	63	-0.002	-0.014	-0.012	-0.002	0	0	0	0	-0.001	0	-0.001	0	0.004	0	-0.033	0.003	0	0	0	0	0	0	0	0	0	0	0
65	66	-0.005	-0.013	-0.002	-0.001	-0.001	0	0	0	0	0	0	0.001	0	0	0	0	0	0	0	-0.008	0.002	0.001	0	-0.001	-0.003	-0.004	0
72	73	-0.006	-0.001	-0.001	0	0	0	0	0	0	0	0	0	0	0	0	0	0	0	0	0	0	0	0	0	-0.001	0	0
73	74	-0.069	-0.003	-0.003	0	0	0	0	0	0	0	0	0	0	0	0	0	0	0	0	0	0	0	0	0	-0.001	0	0
75	76	-0.006	0	-0.001	0	0	0	0	0	0	0	0	0	0	0	0	0	0	0	0	0.002	0	-0.001	0.001	0	0.004	-0.003	-0.002
76	77	-0.001	0	0	0	0	0	0	0	0	0	0	0	0	0	0	0	0	0	0	0.002	0	0	0	0	0.033	-0.011	-0.013
77	78	-0.001	0	-0.001	0	0	0	0	0	0	0	0	0	0	0	0	0	0	0	0	0	0	-0.001	0	0	0.006	0.002	-0.003
79	80	-0.002	0	0	0	0	0	0	0	0	0	0	0	0	0	0	0	0	0	0	0	0	0	0	0	-0.006	-0.045	-0.004
80	81	0	0	0	0	0	0	0	0	0	0	0	0	0	0	0	0	0	0	0	-0.001	0	0	0	0	-0.002	-0.006	0
81	82	0.004	0	0	0	0	0	0	0	0	0	0	0	0	0	0	0	0	0	0	0	0	0	0	0	-0.003	-0.009	-0.001
85	86	0.002	-0.022	0.003	0.006	0.002	0.004	-0.002	0.002	-0.002	0.003	-0.033	0.001	0.002	0.003	0.001	0.001	0	0	0	0	0	0	0	0	0	0	0
87	88	0	-0.001	0	-0.001	-0.002	0.008	-0.003	-0.004	-0.001	-0.003	-0.007	0.008	0	-0.007	-0.003	-0.001	0	0.001	0	0	0	0	0	0	0	0	0
89	90	0	-0.002	0	-0.002	-0.002	-0.007	-0.001	-0.023	-0.025	-0.013	-0.184	-0.004	0	0.001	0	0	0	0	0	0	0	0	0	0	0	0	0
90	91	0	0	0	-0.001	-0.001	0.004	-0.001	-0.007	-0.012	0.011	-0.022	0	0	0	0	0	0	0	0	0	0	0	0	0	0	0	0
91	92	0	-0.001	0	-0.002	0	-0.013	-0.013	-0.154	0.003	0.003	0.032	0	0.001	0	0	0	0	0	0	0	0	0	0	0	0	0	0
96	97	0	0	0	0	0	0	0	0	0	0	0	0.001	0.001	-0.009	0.007	-0.001	-0.001	-0.001	0.002	0	0	0	0	0	0	0	0
97	98	0	0	0	0	0	0	0	0	0	0	0	-0.002	-0.007	-0.024	-0.007	-0.006	-0.006	-0.039	-0.004	0	0	0	0	0	0	0	0
98	99	0	0	0	0	0	0	0	0	0	0	0	-0.004	-0.015	-0.164	-0.041	-0.01	-0.002	-0.005	-0.002	0	0	0	0	0	0	0	0
102	103	0	0	0	0.003	0.004	0	0	0	-0.007	-0.002	0	0	0	0	0	0	0	0	0	-0.011	0.005	0	0	0	0.003	0.002	0.001
104	105	0	0	-0.006	-0.003	0.003	0	0	0	0	0	0	0	0	0	0	0	0	0	0	0.002	0.008	-0.003	0.004	0.007	0	-0.001	0
106	107	0	0	0	0	0	0	0	0	0	0	0	0	0	0	0	0	0	0	0	0	-0.004	0.002	-0.008	-0.007	0.001	0.001	0
107	108	0	0	0	0	0	0	0	0	0	0	0	0	0	0	0	0	0	0	0	-0.002	-0.001	-0.006	-0.214	-0.045	-0.001	0	0
108	109	0	0	0	0	0	0	0	0	0	0	0	0	0	0	0	0	0	0	0	0.001	0.007	-0.006	-0.041	0.001	-0.001	0	0
113	114	0	0	-0.003	-0.014	-0.011	0	0	0.002	0	0	0	0	0	0	0	0	0	0	0	0.002	-0.001	0.001	-0.001	0	0	0	0
114	115	0	0	0	-0.002	-0.003	0	0	0	0	0	0	0	0	0	0	0	0	0	0	0.001	0	0	0	0	0	0	0
115	116	0	0	-0.004	0.007	0	0	0	0	0	0	0	0	0	0	0	0	0	0	0	0.001	0	0	-0.002	-0.001	0	0	0
								residual:	0.214
2-bond
J(15-16)	J(18-19)	J(22-23)	J(32-33)	J(39-40)
-8.856	-12.9065	-12.848	-13.0478	-10.6075
3-bond
J(28-30)	J(30-32)
8.4075	7.18608
4-bond
J(2-5)	J(5-8)	J(15-18)	J(16-18)	J(18-22)	J(28-32)
0.9535	0.588	0.123167	-0.0841667	0.244278	-0.246333

## Sheet: CONF6
Orca lab.	Lab	sigma	Av(258K)	Av(298K)	C1(shift(TMS))	C2(shift(TMS))	ExpSh(258K)	ExpSh(298K)	CalSh(258K)	CalSh(298K)			Orca lab.	Lab	sigma	Av(sigma)	C(shift(TMS))	E(shift)	C(shift)
1H	1H	1H	1H	1H	1H	1H	1H	1H	1H	1H			13C	13C	13C	13C	13C	13C	13C
1	2	22.586	22.511	22.511	9.221	9.221	8.22	8.29	8.37494	8.459			0	1	44.02	43.4255	146.873	129.679	130.085
4	5	22.545	22.8473	22.8473	8.88475	8.88475	8.19	8.29	8.05984	8.13815			2	3	43.589	40.5748	149.723	134.903	132.734
7	8	22.658											3	4	44.847	43.4703	146.828	129.083	130.043
14	15	27.123	26.986	26.9218	4.746	4.81025	4.19	4.16	4.18142	4.25027			5	6	47.097	47.2075	143.091	128.334	126.57
15	16	26.919	26.8575		4.8745		4.17		4.30184	29.939			6	7	41.768
17	18	30.094	29.8357	29.8357	1.89633	1.89633	1.42	1.41	1.511	1.46981			8	9	38.207
18	19	30.09											10	11	7.845	7.4525	182.846	161.781	163.514
19	20	29.894											12	13	109.986	110.442	79.8555	67.472	67.8058
21	22	29.426	29.8413	29.8413	1.89067	1.89067	1.53	1.465	1.50569	1.4644			13	14	98.033	98.081	92.217	79.352	79.2933
22	23	29.951											16	17	154.565	155.439	34.859	27.002	25.9905
23	24	29.448											20	21	156.264
27	28	23.364	22.3932	22.3932	9.33875	9.33875	8.12	7.615	8.48529	8.57136			24	25	9.834	6.952	183.346	166.965	163.98
29	30	26.898	26.4047	26.4047	5.32725	5.32725	4.86	4.84	4.72611	4.74359			28	29	128.291	129.84	60.4575	48.85	49.7792
31	32	30.227	29.7575	29.7575	1.9745	1.9745	1.61	1.57	1.58425	1.54439			30	31	167.237	166.374	23.9243	15.823	15.8289
32	33	29.615											34	35	-5.471	-5.739	196.037	173.23	175.773
33	34	29.974											37	38	127.871	126.823	63.4745	51.445	52.5829
38	39	27.584	27.4348	27.4348	4.29717	4.29717	3.82	3.81	3.76082	3.76068			41	42	3.143
39	40	27.469											45	46	128.46			MAE:	1.23368
40	41	27.572						MAE(C-H):	0.084406	0.0803575			47	48	167.635
44	45	21.082						AE(N-H):	0.365285	0.956361			51	52	-5.099
46	47	27.044											54	55	126.109
48	49	29.678
49	50	29.206											58	59	42.831
50	51	30.111											60	61	39.055
55	56	27.201											61	62	41.54
56	57	27.534											63	64	47.318
57	58	27.511											64	65	45.726
													66	67	41.448
59	60	22.436											68	69	7.06
62	63	22.944											70	71	110.899
65	66	23.242											71	72	98.129
72	73	26.849											74	75	156.087
73	74	26.796											78	79	154.84
75	76	29.51											82	83	4.779
76	77	29.597											86	87	131.075
77	78	29.829											88	89	164.142
79	80	30.087											92	93	-8.097
80	81	30.04											95	96	126.451
81	82	30.096											99	100	10.052
85	86	21.743											103	104	131.536
87	88	25.814											105	106	166.481
89	90	29.347											109	110	-4.289
90	91	29.746											112	113	126.863
91	92	29.371
96	97	27.466
97	98	27.443
98	99	27.302
102	103	23.384
104	105	25.863
106	107	29.796
107	108	30.364
108	109	29.655
113	114	27.42
114	115	27.247
115	116	27.469
										L1
orca lab		1	4	7	14	15	17	18	19	21	22	23	27	29	31	32	33	38	39	40	44	46	48	49	50	55	56	57
	Lab.	2	5	8	15	16	18	19	20	22	23	24	28	30	32	33	34	39	40	41	45	47	49	50	51	56	57	58
1	2	0	0.927	0.87	-0.01	0	0	0.013	0	0.009	0	0	0.058	-0.123	-0.001	0	0.012	0	0	0	-0.172	0.034	-0.022	0.001	0.002	0	0	0
4	5	0.927	0	0.649	-0.007	0.012	-0.086	0.013	0.007	0.01	-0.022	0.006	-0.291	-0.079	-0.002	-0.001	0.008	0	0	0	-0.001	-0.002	0	0	0	0	0	0
7	8	0.87	0.649	0	0.006	-0.005	-0.091	0.017	0.008	0.012	-0.019	0.002	0.033	-0.095	0	0	0	0	0	0	0.03	0.008	-0.022	0.002	0.004	0.001	0.001	0
14	15	-0.01	-0.007	0.006	0	-9.068	-0.407	-0.053	1.324	-0.392	-0.257	0.291	0.001	0	0	0	0	0	0	0	0	0	0	0	0	0	0	0
15	16	0	0.012	-0.005	-9.068	0	-0.301	-0.329	0.463	0.096	-0.226	0.066	0	0	0	0	0	0	0	0	0	0	0	0	0	0	0	0
17	18	0	-0.086	-0.091	-0.407	-0.301	0	-12.324	-13.298	0.063	-0.157	-0.21	0.001	0	0	0	0	0	0	0	0	0	0	0	0	0	0	0
18	19	0.013	0.013	0.017	-0.053	-0.329	-12.324	0	-12.761	3.214	-0.078	-0.075	0	0	0	0	0	0	0	0	0	0	0	0	0	0	0	0
19	20	0	0.007	0.008	1.324	0.463	-13.298	-12.761	0	-0.189	-0.194	-0.174	0	0	0	0	0	0	0	0	0	0	0	0	0	0	0	0
21	22	0.009	0.01	0.012	-0.392	0.096	0.063	3.214	-0.189	0	-13.177	-12.302	0	0	0	0	0	0	0	0	0	0	0	0	0	0	0	0
22	23	0	-0.022	-0.019	-0.257	-0.226	-0.157	-0.078	-0.194	-13.177	0	-13.661	0	0	0	0	0	0	0	0	0	0	0	0	0	0	0	0
23	24	0	0.006	0.002	0.291	0.066	-0.21	-0.075	-0.174	-12.302	-13.661	0	0	0	0	0	0	0	0	0	0	0	0	0	0	0	0	0
27	28	0.058	-0.291	0.033	0.001	0	0.001	0	0	0	0	0	0	4.019	-0.194	-0.234	-0.397	-0.039	-0.029	-0.019	0	0	0	0	0	0	0	0
29	30	-0.123	-0.079	-0.095	0	0	0	0	0	0	0	0	4.019	0	13.683	4.691	3.181	0.096	0.107	0.016	0	0	0	0	0	0	0	0
31	32	-0.001	-0.002	0	0	0	0	0	0	0	0	0	-0.194	13.683	0	-11.702	-13.012	-0.024	-0.022	0.004	0	0	0	0	0	0	0	0
32	33	0	-0.001	0	0	0	0	0	0	0	0	0	-0.234	4.691	-11.702	0	-14.275	0.072	0.018	0.004	0	0	0	0	0	0	0	0
33	34	0.012	0.008	0	0	0	0	0	0	0	0	0	-0.397	3.181	-13.012	-14.275	0	0.019	0.006	-0.002	0	0	0	0	0	0	0	0
38	39	0	0	0	0	0	0	0	0	0	0	0	-0.039	0.096	-0.024	0.072	0.019	0	-10.373	-10.443	0	0	0	0	0	0	0	0
39	40	0	0	0	0	0	0	0	0	0	0	0	-0.029	0.107	-0.022	0.018	0.006	-10.373	0	-10.558	0	0	0	0	0	0	0	0
40	41	0	0	0	0	0	0	0	0	0	0	0	-0.019	0.016	0.004	0.004	-0.002	-10.443	-10.558	0	0	0	0	0	0	0	0	0
44	45	-0.172	-0.001	0.03	0	0	0	0	0	0	0	0	0	0	0	0	0	0	0	0	0	7.223	0.248	-0.367	-0.171	-0.03	-0.036	-0.014
46	47	0.034	-0.002	0.008	0	0	0	0	0	0	0	0	0	0	0	0	0	0	0	0	7.223	0	3.977	13.209	3.724	0.476	0.637	0.035
48	49	-0.022	0	-0.022	0	0	0	0	0	0	0	0	0	0	0	0	0	0	0	0	0.248	3.977	0	-12.851	-13.387	-0.002	-0.002	-0.004
49	50	0.001	0	0.002	0	0	0	0	0	0	0	0	0	0	0	0	0	0	0	0	-0.367	13.209	-12.851	0	-12.626	-0.022	-0.009	0.016
50	51	0.002	0	0.004	0	0	0	0	0	0	0	0	0	0	0	0	0	0	0	0	-0.171	3.724	-13.387	-12.626	0	-0.013	0.033	0.022
55	56	0	0	0.001	0	0	0	0	0	0	0	0	0	0	0	0	0	0	0	0	-0.03	0.476	-0.002	-0.022	-0.013	0	-11.065	-10.685
56	57	0	0	0.001	0	0	0	0	0	0	0	0	0	0	0	0	0	0	0	0	-0.036	0.637	-0.002	-0.009	0.033	-11.065	0	-10.557
57	58	0	0	0	0	0	0	0	0	0	0	0	0	0	0	0	0	0	0	0	-0.014	0.035	-0.004	0.016	0.022	-10.685	-10.557	0
residual:	0.637
										L2
orca lab		59	62	65	72	73	75	76	77	79	80	81	85	87	89	90	91	96	97	98	102	104	106	107	108	113	114	115
	lab	60	63	66	73	74	76	77	78	80	81	82	86	88	90	91	92	97	98	99	103	105	107	108	109	114	115	116
59	60	0	0.928	0.872	0	-0.011	0	0	0	0	0	0.013	-0.233	0.058	0.001	0.001	-0.005	0	0	0	0.058	-0.008	0.006	0.005	-0.016	0	-0.001	-0.001
62	63	0.928	0	0.695	-0.007	0.005	0.012	0.002	-0.017	-0.095	0.008	0.017	0.039	-0.009	0.003	0.006	-0.005	0	0	0	0.029	0.001	0	0.003	0	0	0	0
65	66	0.872	0.695	0	0.013	-0.012	0.009	0.006	-0.02	-0.085	0.006	0.013	0.008	-0.002	0	0	0	0	0	0	-0.325	0.084	0.001	0.001	-0.019	0	0	-0.001
72	73	0	-0.007	0.013	0	-9.074	0.065	-0.016	-0.223	-0.294	0.471	-0.306	0	0	0	0	0	0	0	0	0	0	0	0	0	0	0	0
73	74	-0.011	0.005	-0.012	-9.074	0	-0.378	0.209	-0.264	-0.424	1.434	-0.071	0	0	0	0	0	0	0	0	0	0	0	0	0	0	0	0
75	76	0	0.012	0.009	0.065	-0.378	0	-12.269	-13.078	0.074	-0.192	3.202	0	0	0	0	0	0	0	0	0	0	0	0	0	0	0	0
76	77	0	0.002	0.006	-0.016	0.209	-12.269	0	-13.663	-0.216	-0.176	-0.029	0	0	0	0	0	0	0	0	0	0	0	0	0	0	0	0
77	78	0	-0.017	-0.02	-0.223	-0.264	-13.078	-13.663	0	-0.139	-0.181	-0.089	0	0	0	0	0	0	0	0	0	0	0	0	0	0	0	0
79	80	0	-0.095	-0.085	-0.294	-0.424	0.074	-0.216	-0.139	0	-13.241	-12.422	0	0	0	0	0	0	0	0	0.001	0	0	0	0	0	0	0
80	81	0	0.008	0.006	0.471	1.434	-0.192	-0.176	-0.181	-13.241	0	-12.569	0	0	0	0	0	0	0	0	0	0	0	0	0	0	0	0
81	82	0.013	0.017	0.013	-0.306	-0.071	3.202	-0.029	-0.089	-12.422	-12.569	0	0	0	0	0	0	0	0	0	0	0	0	0	0	0	0	0
85	86	-0.233	0.039	0.008	0	0	0	0	0	0	0	0	0	10.395	-0.113	-0.161	-0.379	-0.006	0.017	0.004	0	0	0	0	0	0	0	0
87	88	0.058	-0.009	-0.002	0	0	0	0	0	0	0	0	10.395	0	13.878	4.404	4.166	0.032	0.492	0.521	0	0	0	0	0	0	0	0
89	90	0.001	0.003	0	0	0	0	0	0	0	0	0	-0.113	13.878	0	-12.099	-13.33	-0.009	-0.024	-0.024	0	0	0	0	0	0	0	0
90	91	0.001	0.006	0	0	0	0	0	0	0	0	0	-0.161	4.404	-12.099	0	-13.566	0.004	0.081	0.119	0	0	0	0	0	0	0	0
91	92	-0.005	-0.005	0	0	0	0	0	0	0	0	0	-0.379	4.166	-13.33	-13.566	0	-0.007	-0.022	0.017	0	0	0	0	0	0	0	0
96	97	0	0	0	0	0	0	0	0	0	0	0	-0.006	0.032	-0.009	0.004	-0.007	0	-10.54	-10.703	0	0	0	0	0	0	0	0
97	98	0	0	0	0	0	0	0	0	0	0	0	0.017	0.492	-0.024	0.081	-0.022	-10.54	0	-10.699	0	0	0	0	0	0	0	0
98	99	0	0	0	0	0	0	0	0	0	0	0	0.004	0.521	-0.024	0.119	0.017	-10.703	-10.699	0	0	0	0	0	0	0	0	0
102	103	0.058	0.029	-0.325	0	0	0	0	0	0.001	0	0	0	0	0	0	0	0	0	0	0	9.749	-0.116	-0.15	-0.339	-0.013	0.004	-0.009
104	105	-0.008	0.001	0.084	0	0	0	0	0	0	0	0	0	0	0	0	0	0	0	0	9.749	0	13.029	4.315	3.326	0.611	0.04	0.637
106	107	0.006	0	0.001	0	0	0	0	0	0	0	0	0	0	0	0	0	0	0	0	-0.116	13.029	0	-12.058	-12.878	-0.003	-0.001	0.005
107	108	0.005	0.003	0.001	0	0	0	0	0	0	0	0	0	0	0	0	0	0	0	0	-0.15	4.315	-12.058	0	-13.19	-0.07	0.059	-0.063
108	109	-0.016	0	-0.019	0	0	0	0	0	0	0	0	0	0	0	0	0	0	0	0	-0.339	3.326	-12.878	-13.19	0	-0.01	0.01	-0.002
113	114	0	0	0	0	0	0	0	0	0	0	0	0	0	0	0	0	0	0	0	-0.013	0.611	-0.003	-0.07	-0.01	0	-11.306	-10.089
114	115	-0.001	0	0	0	0	0	0	0	0	0	0	0	0	0	0	0	0	0	0	0.004	0.04	-0.001	0.059	0.01	-11.306	0	-10
115	116	-0.001	0	-0.001	0	0	0	0	0	0	0	0	0	0	0	0	0	0	0	0	-0.009	0.637	0.005	-0.063	-0.002	-10.089	-10	0
residual:	0.637
										L1-L2
orca lab		1	4	7	14	15	17	18	19	21	22	23	27	29	31	32	33	38	39	40	44	46	48	49	50	55	56	57
	lab	2	5	8	15	16	18	19	20	22	23	24	28	30	32	33	34	39	40	41	45	47	49	50	51	56	57	58
59	60	-0.002	-0.009	0.002	-0.003	0.003	0.002	0.002	0	-0.066	-0.003	0.002	-0.001	0	0	-0.001	0	0	0	0	0.004	0	0	0	0	0	0	0
62	63	0.005	-0.017	0.002	0	0	0	0	0	-0.001	0	0	-0.015	-0.012	0	-0.001	0	0	0	0	0.006	-0.001	0	0	0	0	0	0
65	66	-0.007	-0.014	-0.008	0	0	0	0	0	-0.001	0	0	-0.002	0.001	0	0	0	0	0	0	-0.031	0.001	0.001	0	0	0	0	0
72	73	0.001	0	0	0	0	0	0	0	0	0	0	0	0.001	0	0	0	0	0	0	-0.001	0.003	0	0	0	0	0	0
73	74	-0.004	0	0	0	0	0	0	0	0	0	0	0.001	-0.002	0	0	0	0	0	0	0.004	0	0	0.001	0.001	0	0	0
75	76	-0.062	-0.001	-0.002	0	0	0	0	0	0	0	0	-0.001	0	0	0	0	0	0	0	0	-0.004	0	-0.001	-0.004	0	0	0
76	77	-0.001	0	0	0	0	0	0	0	0	0	0	0	0	0	0	0	0	0	0	-0.021	-0.061	-0.002	-0.012	-0.063	0	0.001	0
77	78	-0.005	0	0	0	0	0	0	0	0	0	0	-0.001	0	0	0	0	0	0	0	0.028	-0.01	0.001	-0.003	-0.007	0	0	0
79	80	0.002	0	0	0	0	0	0	0	0	0	0	0	0.002	0	0	0	0	0	0	0.016	-0.005	0	0.001	0	0	0	0
80	81	0	0	0	0	0	0	0	0	0	0	0	0	0	0	0	0	0	0	0	0.002	-0.031	0	0.001	0	0	0	0
81	82	0.001	0	0	0	0	0	0	0	0	0	0	0	0	0	0	0	0	0	0	-0.005	-0.003	0	-0.001	0	0	0	0
85	86	-0.001	-0.063	0.001	0.007	0	0.002	-0.001	0.001	0.001	0.007	-0.023	0.001	0	0	0.005	0.001	0	0	0	0	0	0	0	0	0	0	0
87	88	0	-0.007	0	-0.003	-0.001	-0.003	0.001	-0.011	-0.002	0.004	0.002	-0.021	0.008	0	-0.01	-0.001	0	0	0	0	0	0	0	0	0	0	0
89	90	0	0	0	-0.002	-0.001	-0.018	-0.032	-0.195	-0.04	-0.015	-0.236	0.001	0	0	0.001	0	0	0	0	0	0	0	0	0	0	0	0
90	91	0	0.002	0	0.003	0.002	-0.002	-0.007	-0.029	-0.01	-0.003	-0.043	-0.001	-0.001	0	0	0	0	0	0	0	0	0	0	0	0	0	0
91	92	0	0	0	0	0	-0.001	-0.004	-0.014	-0.018	0.012	-0.045	0.001	0	0.001	-0.001	0	0	0	0	0	0	0	0	0	0	0	0
96	97	0	0	0	0	0	0	0	0	0	0	0	0.002	0	-0.016	-0.001	0	0	0	0	0	0	0	0	0	0	0	0
97	98	0	0	0	0	0	0	0	0	0	0	0	-0.006	0.01	-0.018	-0.003	-0.004	0	0	0	0	0	0	0	0	0	0	0
98	99	0	0.001	0	0	0	0	0	0	0	0	0	-0.01	0.005	-0.137	-0.003	-0.01	0	0	0	0	0	0	0	0	0	0	0
102	103	-0.001	0	-0.001	0	-0.001	0	0	0	-0.003	-0.001	0	0.001	0	0	0	0	0	0	0	0.001	-0.003	0	-0.001	0.003	0	0.001	0.001
104	105	0	0	0.005	-0.005	-0.001	0	0	0	0	0	0	0	0	0	0	0	0	0	0	-0.001	0	0	0	0	-0.004	0.01	0.012
106	107	0	0	0	0	0	0	0	0	0	0	0	0	0	0	0	0	0	0	0	0	0.001	0	0	-0.001	0.001	-0.022	-0.001
107	108	0	0	0.001	0	0	0	0	0	0	0	0	0	0	0	0	0	0	0	0	0	0	0	0	0	0.001	-0.003	0.003
108	109	0	0	0.003	0	0	0	0	0	0	0	0	0	0	0	0	0	0	0	0	0	0	0	0	0	0.001	-0.004	-0.002
113	114	-0.001	-0.001	-0.001	0	0	0	0	0	0	0	0	0	0	0	0	0	0	0	0	0.007	-0.001	0	0	0	-0.099	-0.022	-0.007
114	115	0	0	-0.056	0	0	0	0	0	0	0	0	0	0	0	0	0	0	0	0	0.004	0	0	0	0	-0.01	-0.002	-0.001
115	116	0	0	0.014	0	0	0	0	0	0	0	0	0	0	0	0	0	0	0	0	0.014	-0.001	0	0	0	-0.019	-0.006	0
								residual:	0.236
2-bond
J(15-16)	J(18-19)	J(22-23)	J(32-33)	J(39-40)
-9.071	-12.8988	-12.8953	-12.9145	-10.5848
3-bond
J(28-30)	J(30-32)
7.8465	7.13192
4-bond
J(2-5)	J(5-8)	J(15-18)	J(16-18)	J(18-22)	J(28-32)
0.89925	0.672	0.130417	-0.0905833	0.247444	-0.19775

## Sheet: CONF7
Orca lab.	Lab	sigma	Av(258K)	Av(298K)	C1(shift(TMS))	C2(shift(TMS))	ExpSh(258K)	ExpSh(298K)	CalSh(258K)	CalSh(298K)			Orca lab.	Lab	sigma	Av(sigma)	C(shift(TMS))	E(shift)	C(shift)
1H	1H	1H	1H	1H	1H	1H	1H	1H	1H	1H			13C	13C	13C	13C	13C	13C	13C
1	2	22.467	22.4525	22.4525	9.2795	9.2795	8.22	8.29	8.51565	8.60998			0	1	42.411	42.792	147.506	129.679	130.831
4	5	23.312	23.028	23.028	8.704	8.704	8.19	8.29	7.96858	8.0529			2	3	41.436	41.1088	149.189	134.903	132.395
7	8	22.74											3	4	46.624	43.7702	146.528	129.083	129.921
14	15	26.834	26.838	26.9025	4.894	4.8295	4.19	4.16	4.3468	4.30238			5	6	46.803	47.4985	142.799	128.334	126.455
15	16	26.946	26.967		4.765		4.17		4.22417	30.344			6	7	41.411
17	18	30.101	29.8147	29.8147	1.91733	1.91733	1.42	1.41	1.51718	1.4834			8	9	39.526
18	19	29.863											10	11	8.023	7.9565	182.341	161.781	163.214
19	20	30.092											12	13	109.571	110.127	80.1705	67.472	68.2355
21	22	29.437	29.769	29.769	1.963	1.963	1.53	1.465	1.56059	1.52761			13	14	98.454	98.4815	91.8165	79.352	79.0616
22	23	29.137											16	17	154.569	155.439	34.8588	27.002	26.1137
23	24	29.883											20	21	156.276
27	28	23.84	22.3473	22.3473	9.38475	9.38475	8.12	7.615	8.6157	8.71186			24	25	10.369	6.96075	183.337	166.965	164.139
29	30	25.847	26.623	26.623	5.109	5.109	4.86	4.84	4.55118	4.57294			28	29	132.048	129.232	61.0662	48.85	50.4762
31	32	29.977	29.6779	29.6779	2.05408	2.05408	1.61	1.57	1.64717	1.61578			30	31	167.072	167.353	22.9452	15.823	15.0389
32	33	29.475											34	35	-3.915	-5.30925	195.607	173.23	175.545
33	34	29.872											37	38	127.899	127.111	63.1868	51.445	52.4474
38	39	27.765	27.5523	27.5523	4.17967	4.17967	3.82	3.81	3.66775	3.67334			41	42	3.601
39	40	27.566											45	46	128.413			MAE:	1.40806
40	41	27.636						MAE(C-H):	0.15045	0.160622			47	48	167.93
44	45	21.033						AE(N-H):	0.495704	1.09686			51	52	-5.735
46	47	26.973											54	55	127.001
48	49	29.684
49	50	29.183											58	59	43.173
50	51	30.091											60	61	39.821
55	56	27.328											61	62	41.505
56	57	27.41											63	64	48.194
57	58	27.399											64	65	45.541
													66	67	43.652
59	60	22.438											68	69	7.89
62	63	22.834											70	71	110.684
65	66	23.226											71	72	98.509
72	73	26.842											74	75	156.178
73	74	26.988											78	79	154.734
75	76	29.438											82	83	2.887
76	77	29.578											86	87	127.45
77	78	29.816											88	89	166.122
79	80	30.069											92	93	-8.172
80	81	30.002											95	96	125.266
81	82	30.086											99	100	10.986
85	86	21.73											103	104	129.016
87	88	26.739											105	106	168.287
89	90	29.744											109	110	-3.415
90	91	29.667											112	113	128.279
91	92	29.337
96	97	27.51
97	98	27.677
98	99	27.206
102	103	22.786
104	105	26.933
106	107	29.811
107	108	29.423
108	109	29.871
113	114	27.563
114	115	27.692
115	116	27.876
										L1
orca lab		1	4	7	14	15	17	18	19	21	22	23	27	29	31	32	33	38	39	40	44	46	48	49	50	55	56	57
	Lab.	2	5	8	15	16	18	19	20	22	23	24	28	30	32	33	34	39	40	41	45	47	49	50	51	56	57	58
1	2	0	0.871	0.923	-0.01	0	0.013	0	0	0	0	0	0.06	-0.002	0.004	-0.004	0.002	0	0	0	-0.199	0.04	-0.022	0.001	0.002	0	0	0
4	5	0.871	0	0.68	-0.009	0.009	0.013	0.008	-0.083	0.006	0.01	-0.025	-0.319	0.094	0.002	-0.011	0	0	0	0	0.001	0	0	0	0	0	0	0
7	8	0.923	0.68	0	0.007	-0.006	0.017	0.009	-0.089	0.002	0.012	-0.022	0.03	0.006	0	0	0	0	0	0	0.032	0.013	-0.022	0.002	0.005	0.001	0	0
14	15	-0.01	-0.009	0.007	0	-8.88	-0.073	1.314	-0.408	0.312	-0.394	-0.256	0	0	0	0	0	0	0	0	0	0	0	0	0	0	0	0
15	16	0	0.009	-0.006	-8.88	0	-0.328	0.472	-0.303	0.081	0.095	-0.236	0	0	0	0	0	0	0	0	0	0	0	0	0	0	0	0
17	18	0.013	0.013	0.017	-0.073	-0.328	0	-12.468	-12.515	-0.096	3.19	-0.066	0	0	0	0	0	0	0	0	0	0	0	0	0	0	0	0
18	19	0	0.008	0.009	1.314	0.472	-12.468	0	-13.408	-0.192	-0.165	-0.203	0	0	0	0	0	0	0	0	0	0	0	0	0	0	0	0
19	20	0	-0.083	-0.089	-0.408	-0.303	-12.515	-13.408	0	-0.21	0.035	-0.153	0.001	0	0	0	0	0	0	0	0	0	0	0	0	0	0	0
21	22	0	0.006	0.002	0.312	0.081	-0.096	-0.192	-0.21	0	-12.163	-13.72	0	0	0	0	0	0	0	0	0	0	0	0	0	0	0	0
22	23	0	0.01	0.012	-0.394	0.095	3.19	-0.165	0.035	-12.163	0	-13.3	0	0	0	0	0	0	0	0	0	0	0	0	0	0	0	0
23	24	0	-0.025	-0.022	-0.256	-0.236	-0.066	-0.203	-0.153	-13.72	-13.3	0	0	0	0	0	0	0	0	0	0	0	0	0	0	0	0	0
27	28	0.06	-0.319	0.03	0	0	0	0	0.001	0	0	0	0	10.258	-0.147	-0.391	-0.107	0.004	-0.008	-0.011	0	0	0	0	0	0	0	0
29	30	-0.002	0.094	0.006	0	0	0	0	0	0	0	0	10.258	0	5.184	2.843	13.158	0.041	0.593	0.585	0	0	0	0	0	0	0	0
31	32	0.004	0.002	0	0	0	0	0	0	0	0	0	-0.147	5.184	0	-13.576	-12.384	0.049	-0.069	-0.073	0	0	0	0	0	0	0	0
32	33	-0.004	-0.011	0	0	0	0	0	0	0	0	0	-0.391	2.843	-13.576	0	-13.138	0.014	-0.003	-0.012	0	0	0	0	0	0	0	0
33	34	0.002	0	0	0	0	0	0	0	0	0	0	-0.107	13.158	-12.384	-13.138	0	-0.005	0.009	-0.005	0	0	0	0	0	0	0	0
38	39	0	0	0	0	0	0	0	0	0	0	0	0.004	0.041	0.049	0.014	-0.005	0	-10.277	-10.606	0	0	0	0	0	0	0	0
39	40	0	0	0	0	0	0	0	0	0	0	0	-0.008	0.593	-0.069	-0.003	0.009	-10.277	0	-10.416	0	0	0	0	0	0	0	0
40	41	0	0	0	0	0	0	0	0	0	0	0	-0.011	0.585	-0.073	-0.012	-0.005	-10.606	-10.416	0	0	0	0	0	0	0	0	0
44	45	-0.199	0.001	0.032	0	0	0	0	0	0	0	0	0	0	0	0	0	0	0	0	0	7.213	0.285	-0.36	-0.165	-0.037	-0.015	-0.03
46	47	0.04	0	0.013	0	0	0	0	0	0	0	0	0	0	0	0	0	0	0	0	7.213	0	3.813	13.23	3.757	0.54	0.062	0.515
48	49	-0.022	0	-0.022	0	0	0	0	0	0	0	0	0	0	0	0	0	0	0	0	0.285	3.813	0	-12.917	-13.429	-0.002	-0.004	0
49	50	0.001	0	0.002	0	0	0	0	0	0	0	0	0	0	0	0	0	0	0	0	-0.36	13.23	-12.917	0	-12.544	-0.004	0.02	-0.02
50	51	0.002	0	0.005	0	0	0	0	0	0	0	0	0	0	0	0	0	0	0	0	-0.165	3.757	-13.429	-12.544	0	0.027	0.019	-0.015
55	56	0	0	0.001	0	0	0	0	0	0	0	0	0	0	0	0	0	0	0	0	-0.037	0.54	-0.002	-0.004	0.027	0	-10.474	-10.414
56	57	0	0	0	0	0	0	0	0	0	0	0	0	0	0	0	0	0	0	0	-0.015	0.062	-0.004	0.02	0.019	-10.474	0	-10.896
57	58	0	0	0	0	0	0	0	0	0	0	0	0	0	0	0	0	0	0	0	-0.03	0.515	0	-0.02	-0.015	-10.414	-10.896	0
residual:	0.593
										L2
orca lab		59	62	65	72	73	75	76	77	79	80	81	85	87	89	90	91	96	97	98	102	104	106	107	108	113	114	115
	lab	60	63	66	73	74	76	77	78	80	81	82	86	88	90	91	92	97	98	99	103	105	107	108	109	114	115	116
59	60	0	0.864	0.92	0	-0.009	0	0	0	0	0	0.014	-0.171	-0.063	0.01	0	0.002	0	0	0	0.062	0.007	-0.018	0.005	0.006	-0.001	-0.001	0
62	63	0.864	0	0.69	-0.01	0.005	0.013	0.002	-0.021	-0.093	0.008	0.018	0.035	-0.088	0.011	0	0.004	0	0	0	0.036	0	0	0.004	0	0	0	0
65	66	0.92	0.69	0	0.005	-0.007	0.01	0.006	-0.023	-0.088	0.007	0.014	0.003	-0.061	0	0	0	0	0	0	-0.283	0.039	-0.024	0.002	0.003	-0.001	-0.001	0
72	73	0	-0.01	0.005	0	-9.069	0.063	-0.008	-0.222	-0.295	0.468	-0.311	0	0	0	0	0	0	0	0	0	0	0	0	0	0	0	0
73	74	-0.009	0.005	-0.007	-9.069	0	-0.382	0.226	-0.257	-0.42	1.416	-0.078	0	0	0	0	0	0	0	0	0	0	0	0	0	0	0	0
75	76	0	0.013	0.01	0.063	-0.382	0	-12.162	-13.207	0.075	-0.193	3.214	0	0	0	0	0	0	0	0	0	0	0	0	0	0	0	0
76	77	0	0.002	0.006	-0.008	0.226	-12.162	0	-13.709	-0.217	-0.179	-0.04	0	0	0	0	0	0	0	0	0	0	0	0	0	0	0	0
77	78	0	-0.021	-0.023	-0.222	-0.257	-13.207	-13.709	0	-0.139	-0.183	-0.083	0	0	0	0	0	0	0	0	0	0	0	0	0	0	0	0
79	80	0	-0.093	-0.088	-0.295	-0.42	0.075	-0.217	-0.139	0	-13.23	-12.424	0	0	0	0	0	0	0	0	0.002	0	0	0	0	0	0	0
80	81	0	0.008	0.007	0.468	1.416	-0.193	-0.179	-0.183	-13.23	0	-12.592	0	0	0	0	0	0	0	0	0	0	0	0	0	0	0	0
81	82	0.014	0.018	0.014	-0.311	-0.078	3.214	-0.04	-0.083	-12.424	-12.592	0	0	0	0	0	0	0	0	0	0	0	0	0	0	0	0	0
85	86	-0.171	0.035	0.003	0	0	0	0	0	0	0	0	0	5.625	-0.394	-0.205	-0.219	-0.02	-0.03	-0.024	0	0	0	0	0	0	0	0
87	88	-0.063	-0.088	-0.061	0	0	0	0	0	0	0	0	5.625	0	2.826	13.602	5.106	0.008	0.146	0.119	0	0	0	0	0	0	0	0
89	90	0.01	0.011	0	0	0	0	0	0	0	0	0	-0.394	2.826	0	-13.06	-14.374	-0.001	0.026	0.009	0	0	0	0	0	0	0	0
90	91	0	0	0	0	0	0	0	0	0	0	0	-0.205	13.602	-13.06	0	-11.539	0.003	-0.028	-0.021	0	0	0	0	0	0	0	0
91	92	0.002	0.004	0	0	0	0	0	0	0	0	0	-0.219	5.106	-14.374	-11.539	0	-0.004	0.095	0.021	0	0	0	0	0	0	0	0
96	97	0	0	0	0	0	0	0	0	0	0	0	-0.02	0.008	-0.001	0.003	-0.004	0	-10.599	-10.68	0	0	0	0	0	0	0	0
97	98	0	0	0	0	0	0	0	0	0	0	0	-0.03	0.146	0.026	-0.028	0.095	-10.599	0	-10.923	0	0	0	0	0	0	0	0
98	99	0	0	0	0	0	0	0	0	0	0	0	-0.024	0.119	0.009	-0.021	0.021	-10.68	-10.923	0	0	0	0	0	0	0	0	0
102	103	0.062	0.036	-0.283	0	0	0	0	0	0.002	0	0	0	0	0	0	0	0	0	0	0	6.223	-0.322	-0.209	-0.175	-0.028	-0.005	-0.011
104	105	0.007	0	0.039	0	0	0	0	0	0	0	0	0	0	0	0	0	0	0	0	6.223	0	3.173	13.396	4.301	0.539	0.517	0.041
106	107	-0.018	0	-0.024	0	0	0	0	0	0	0	0	0	0	0	0	0	0	0	0	-0.322	3.173	0	-13.293	-13.425	-0.002	-0.007	0.01
107	108	0.005	0.004	0.002	0	0	0	0	0	0	0	0	0	0	0	0	0	0	0	0	-0.209	13.396	-13.293	0	-12.067	0.005	0.007	0
108	109	0.006	0	0.003	0	0	0	0	0	0	0	0	0	0	0	0	0	0	0	0	-0.175	4.301	-13.425	-12.067	0	-0.059	-0.06	0.066
113	114	-0.001	0	-0.001	0	0	0	0	0	0	0	0	0	0	0	0	0	0	0	0	-0.028	0.539	-0.002	0.005	-0.059	0	-10.283	-10.31
114	115	-0.001	0	-0.001	0	0	0	0	0	0	0	0	0	0	0	0	0	0	0	0	-0.005	0.517	-0.007	0.007	-0.06	-10.283	0	-10.63
115	116	0	0	0	0	0	0	0	0	0	0	0	0	0	0	0	0	0	0	0	-0.011	0.041	0.01	0	0.066	-10.31	-10.63	0
residual:	0.539
										L1-L2
orca lab		1	4	7	14	15	17	18	19	21	22	23	27	29	31	32	33	38	39	40	44	46	48	49	50	55	56	57
	lab	2	5	8	15	16	18	19	20	22	23	24	28	30	32	33	34	39	40	41	45	47	49	50	51	56	57	58
59	60	0.001	-0.008	0.006	-0.004	0.002	0.001	0.001	0.003	0.008	-0.129	-0.028	0	0	0	0	-0.001	0	0	0	0.003	0	0	0	0	0	0	0
62	63	0.005	-0.012	0.001	-0.001	0	0	0	0	-0.001	-0.002	0	0.018	0.005	-0.108	-0.023	-0.012	0	0	0	0.006	-0.001	0	0	0	0	0	0
65	66	-0.011	-0.012	-0.016	-0.001	0	0	0	0	0	0	0	0.001	0	0	0	0.001	0	0	0	-0.04	0.001	0	0.001	0.001	0	0	0
72	73	0.003	0	0	0	0	0	0	0	0	0	0	-0.002	0	-0.002	0	0	0	0	0	0.001	0.003	0	0	0	0	0	0
73	74	-0.004	-0.001	-0.001	0	0	0	0	0	0	0	0	0	-0.002	-0.003	0	0	0	0	0	0.003	0	0	0	0	0	0	0
75	76	-0.102	-0.001	-0.002	0	0	0	0	0	0	0	0	-0.002	0	0	0	0	0	0	0	-0.01	-0.003	-0.001	0	-0.003	0	0	0
76	77	0.004	0	0	0	0	0	0	0	0	0	0	0	0	0	0	0	0	0	0	-0.045	-0.055	0	-0.005	-0.03	0	0	0
77	78	-0.013	0	0	0	0	0	0	0	0	0	0	0	0	0	0	0	0	0	0	0	-0.011	0.001	-0.001	-0.003	0	0	0
79	80	0.004	0	0	0	0	0	0	0	0	0	0	0	0	0	0	0	0	0	0	0.014	-0.004	0	0.001	0	0	0	0
80	81	0.001	0	0	0	0	0	0	0	0	0	0	0	0	0	0	0	0	0	0	0.001	-0.026	0	0.002	0	0	0	0
81	82	0.001	0	0	0	0	0	0	0	0	0	0	0	0	0	0	0	0	0	0	-0.004	-0.003	0	0	0	0	0	0
85	86	0.001	-0.032	0.003	0.006	0.001	-0.001	-0.001	0.004	-0.035	-0.001	0.002	0.001	0.001	0.001	0.001	0.003	0	0	0	0	0	0	0	0	0	0	0
87	88	0	-0.004	0	-0.001	-0.002	-0.002	-0.002	0.01	-0.007	-0.001	-0.003	0.008	0.001	-0.003	0	-0.007	0	0	0	0	0	0	0	0	0	0	0
89	90	0	0	0	-0.001	-0.001	-0.002	-0.002	0.007	-0.022	-0.012	0.01	0	0	0	0	0	0	0	0	0	0	0	0	0	0	0	0
90	91	0	-0.001	0	-0.002	0	-0.015	-0.015	-0.011	0.028	0.001	0.004	0	0.001	0	0	0	0	0	0	0	0	0	0	0	0	0	0
91	92	0	-0.002	0	-0.002	-0.002	-0.005	-0.005	-0.009	-0.175	-0.028	-0.011	-0.004	0	0	0	0.001	0	0	0	0	0	0	0	0	0	0	0
96	97	0	0	0	0	0	0	0	0	0	0	0	0.001	0.001	0.006	-0.001	-0.006	0.001	-0.001	-0.003	0	0	0	0	0	0	0	0
97	98	0	0	0	0	0	0	0	0	0	0	0	-0.001	-0.007	-0.005	-0.004	-0.021	-0.004	-0.006	-0.036	0	0	0	0	0	0	0	0
98	99	0	0	0	0	0	0	0	0	0	0	0	-0.003	-0.012	-0.021	-0.007	-0.124	-0.001	-0.002	-0.004	0	0	0	0	0	0	0	0
102	103	-0.002	-0.002	-0.006	0	-0.003	0	0	0	-0.001	-0.01	-0.003	0.001	0	0	0	0	0	0	0	0.001	-0.02	0	-0.001	0.003	-0.003	0.001	-0.002
104	105	0.001	0.001	0.003	0	0	0	0	0	0	0	0	0	0	0	0	0	0	0	0	0	0.006	0	0	-0.004	-0.002	-0.024	-0.065
106	107	0.001	0.001	-0.068	-0.007	0	0	0	0	0	0	0	0	0	0	0	0	0	0	0	0	0.001	0	0	0	0	0	-0.001
107	108	0.001	-0.001	-0.052	-0.069	-0.004	0	0	0	0	0	0	0	0	0	0	0	0	0	0	-0.001	-0.001	0	0	0	0.004	0	-0.002
108	109	-0.001	0.001	-0.178	-0.01	0	0	0	0	0	0	0	0	0	0	0	0	0	0	0	0	-0.001	0	0	0	-0.003	-0.002	-0.014
113	114	0	0	0	0	0	0	0	0	0	0	0	0	0	0	0	0	0	0	0	0	0	0	0	0	0	0	0
114	115	0	0	0	0	0	0	0	0	0	0	0	0	0	0	0	0	0	0	0	0	0	0	0	0	0	0	0
115	116	0	0	0	0	0	0	0	0	0	0	0	0	0	0	0	0	0	0	0	0	0	0	0	0	0	0	0
								residual:	0.178
2-bond
J(15-16)	J(18-19)	J(22-23)	J(32-33)	J(39-40)
-8.9745	-12.9115	-12.9048	-12.9788	-10.5423
3-bond
J(28-30)	J(30-32)
7.32975	7.03242
4-bond
J(2-5)	J(5-8)	J(15-18)	J(16-18)	J(18-22)	J(28-32)
0.8945	0.685	0.127	-0.0873333	0.244167	-0.20075

## Sheet: CONF8
Orca lab.	Lab	sigma	Av(258K)	Av(298K)	C1(shift(TMS))	C2(shift(TMS))	ExpSh(258K)	ExpSh(298K)	CalSh(258K)	CalSh(298K)			Orca lab.	Lab	sigma	Av(sigma)	C(shift(TMS))	E(shift)	C(shift)
1H	1H	1H	1H	1H	1H	1H	1H	1H	1H	1H			13C	13C	13C	13C	13C	13C	13C
1	2	22.434	22.4485	22.4485	9.2835	9.2835	8.22	8.29	8.4679	8.55128			0	1	42.814	42.504	147.794	129.679	131.023
4	5	23.25	22.9905	22.9905	8.7415	8.7415	8.19	8.29	7.95587	8.03004			2	3	42.624	40.371	149.927	134.903	133.007
7	8	22.6											3	4	47.303	44.1162	146.182	129.083	129.523
14	15	27.117	26.9945	26.9507	4.7375	4.78125	4.19	4.16	4.1733	4.22146			5	6	47.059	47.522	142.776	128.334	126.355
15	16	26.954	26.907		4.825		4.17		4.25596				6	7	41.338
17	18	29.843	29.8133	29.8133	1.91867	1.91867	1.42	1.41	1.51034	1.46852			8	9	37.772
18	19	30.116											10	11	8.053	7.8285	182.47	161.781	163.278
19	20	30.102											12	13	109.519	110.16	80.138	67.472	68.0892
21	22	29.898	29.8207	29.8207	1.91133	1.91133	1.53	1.465	1.50342	1.46146			13	14	98.259	98.4535	91.8445	79.352	78.9786
22	23	29.409											16	17	154.62	155.457	34.8407	27.002	25.9537
23	24	29.342											20	21	155.932
27	28	23.405	22.3045	22.3045	9.4275	9.4275	8.12	7.615	8.60394	8.68976			24	25	11.219	6.828	183.47	166.965	164.209
29	30	25.821	26.3588	26.3588	5.37325	5.37325	4.86	4.84	4.77389	4.79079			28	29	131.644	129.788	60.51	48.85	49.8312
31	32	29.731	29.7118	29.7118	2.02017	2.02017	1.61	1.57	1.60623	1.56613			30	31	166.538	166.666	23.6325	15.823	15.5278
32	33	29.847											34	35	-3.468	-5.17175	195.47	173.23	175.371
33	34	29.568											37	38	127.824	126.715	63.5833	51.445	52.6899
38	39	27.273	27.4357	27.4357	4.29625	4.29625	3.82	3.81	3.75645	3.75504			41	42	2.897
39	40	27.703											45	46	128.412			MAE:	1.27795
40	41	27.696						MAE(C-H):	0.0950055	0.0940998			47	48	167.619
44	45	21.043						AE(N-H):	0.483939	1.07476			51	52	-5.088
46	47	27.041											54	55	125.982
48	49	30.09
49	50	29.657											58	59	42.194
50	51	29.173											60	61	39.352
55	56	27.488											61	62	41.468
56	57	27.508											63	64	47.985
57	58	27.224											64	65	46.356
													66	67	41.736
59	60	22.463											68	69	7.604
62	63	22.855											70	71	110.801
65	66	23.257											71	72	98.648
72	73	26.872											74	75	156.403
73	74	26.86											78	79	154.874
75	76	29.414											82	83	2.866
76	77	29.588											86	87	127.569
77	78	29.817											88	89	166.025
79	80	30.102											92	93	-7.799
80	81	30.049											95	96	126.303
81	82	30.124											99	100	10.33
85	86	21.541											103	104	131.527
87	88	26.761											105	106	166.48
89	90	29.676											109	110	-4.332
90	91	29.329											112	113	126.75
91	92	29.731
96	97	27.502
97	98	27.511
98	99	27.172
102	103	23.229
104	105	25.812
106	107	29.77
107	108	30.342
108	109	29.628
113	114	27.402
114	115	27.254
115	116	27.496
										L1
orca lab		1	4	7	14	15	17	18	19	21	22	23	27	29	31	32	33	38	39	40	44	46	48	49	50	55	56	57
	Lab.	2	5	8	15	16	18	19	20	22	23	24	28	30	32	33	34	39	40	41	45	47	49	50	51	56	57	58
1	2	0	0.929	0.869	-0.011	0	0	0	0.013	0	0	0	0.059	-0.007	0.003	0.004	-0.008	0	0	0	-0.149	0.031	0.001	-0.021	0.001	0	0	0
4	5	0.929	0	0.662	-0.01	0.008	0.008	-0.083	0.013	-0.024	0.006	0.01	-0.322	0.089	0	0.001	-0.015	0	0	0	-0.004	-0.002	0	0	0	0	0	0
7	8	0.869	0.662	0	0.005	-0.007	0.009	-0.088	0.017	-0.021	0.001	0.012	0.031	0.004	0	0	0	0	0	0	0.029	0.007	0.004	-0.022	0.002	0.001	0	0.001
14	15	-0.011	-0.01	0.005	0	-9.108	1.328	-0.406	-0.058	-0.264	0.303	-0.393	0	0	0	0	0	0	0	0	0	0	0	0	0	0	0	0
15	16	0	0.008	-0.007	-9.108	0	0.488	-0.3	-0.318	-0.228	0.083	0.097	0	0	0	0	0	0	0	0	0	0	0	0	0	0	0	0
17	18	0	0.008	0.009	1.328	0.488	0	-13.428	-12.524	-0.206	-0.175	-0.163	0	0	0	0	0	0	0	0	0	0	0	0	0	0	0	0
18	19	0	-0.083	-0.088	-0.406	-0.3	-13.428	0	-12.517	-0.161	-0.214	0.033	0.001	0	0	0	0	0	0	0	0	0	0	0	0	0	0	0
19	20	0.013	0.013	0.017	-0.058	-0.318	-12.524	-12.517	0	-0.052	-0.1	3.218	0	0	0	0	0	0	0	0	0	0	0	0	0	0	0	0
21	22	0	-0.024	-0.021	-0.264	-0.228	-0.206	-0.161	-0.052	0	-13.697	-13.207	0	0	0	0	0	0	0	0	0	0	0	0	0	0	0	0
22	23	0	0.006	0.001	0.303	0.083	-0.175	-0.214	-0.1	-13.697	0	-12.264	0	0	0	0	0	0	0	0	0	0	0	0	0	0	0	0
23	24	0	0.01	0.012	-0.393	0.097	-0.163	0.033	3.218	-13.207	-12.264	0	0	0	0	0	0	0	0	0	0	0	0	0	0	0	0	0
27	28	0.059	-0.322	0.031	0	0	0	0.001	0	0	0	0	0	10.062	-0.113	-0.159	-0.385	-0.002	0.009	-0.008	0	0	0	0	0	0	0	0
29	30	-0.007	0.089	0.004	0	0	0	0	0	0	0	0	10.062	0	13.066	4.928	3.022	0.377	0.672	0.023	0	0	0	0	0	0	0	0
31	32	0.003	0	0	0	0	0	0	0	0	0	0	-0.113	13.066	0	-12.507	-12.831	-0.024	-0.011	0.006	0	0	0	0	0	0	0	0
32	33	0.004	0.001	0	0	0	0	0	0	0	0	0	-0.159	4.928	-12.507	0	-13.854	-0.016	0.05	0.025	0	0	0	0	0	0	0	0
33	34	-0.008	-0.015	0	0	0	0	0	0	0	0	0	-0.385	3.022	-12.831	-13.854	0	-0.008	0.002	-0.001	0	0	0	0	0	0	0	0
38	39	0	0	0	0	0	0	0	0	0	0	0	-0.002	0.377	-0.024	-0.016	-0.008	0	-10.819	-10.098	0	0	0	0	0	0	0	0
39	40	0	0	0	0	0	0	0	0	0	0	0	0.009	0.672	-0.011	0.05	0.002	-10.819	0	-10.531	0	0	0	0	0	0	0	0
40	41	0	0	0	0	0	0	0	0	0	0	0	-0.008	0.023	0.006	0.025	-0.001	-10.098	-10.531	0	0	0	0	0	0	0	0	0
44	45	-0.149	-0.004	0.029	0	0	0	0	0	0	0	0	0	0	0	0	0	0	0	0	0	7.221	-0.171	0.263	-0.372	-0.035	-0.013	-0.031
46	47	0.031	-0.002	0.007	0	0	0	0	0	0	0	0	0	0	0	0	0	0	0	0	7.221	0	3.724	4.003	13.216	0.626	0.041	0.499
48	49	0.001	0	0.004	0	0	0	0	0	0	0	0	0	0	0	0	0	0	0	0	-0.171	3.724	0	-13.372	-12.578	0.038	0.021	-0.017
49	50	-0.021	0	-0.022	0	0	0	0	0	0	0	0	0	0	0	0	0	0	0	0	0.263	4.003	-13.372	0	-12.855	-0.001	-0.004	-0.005
50	51	0.001	0	0.002	0	0	0	0	0	0	0	0	0	0	0	0	0	0	0	0	-0.372	13.216	-12.578	-12.855	0	-0.009	0.014	-0.024
55	56	0	0	0.001	0	0	0	0	0	0	0	0	0	0	0	0	0	0	0	0	-0.035	0.626	0.038	-0.001	-0.009	0	-10.527	-11.094
56	57	0	0	0	0	0	0	0	0	0	0	0	0	0	0	0	0	0	0	0	-0.013	0.041	0.021	-0.004	0.014	-10.527	0	-10.735
57	58	0	0	0.001	0	0	0	0	0	0	0	0	0	0	0	0	0	0	0	0	-0.031	0.499	-0.017	-0.005	-0.024	-11.094	-10.735	0
residual:	0.672
										L2
orca lab		59	62	65	72	73	75	76	77	79	80	81	85	87	89	90	91	96	97	98	102	104	106	107	108	113	114	115
	lab	60	63	66	73	74	76	77	78	80	81	82	86	88	90	91	92	97	98	99	103	105	107	108	109	114	115	116
59	60	0	0.863	0.91	0	-0.01	0	0	0	0	0	0.014	-0.14	-0.068	0	0.002	0.011	0	0	0	0.06	-0.008	0.006	0.005	-0.016	0	-0.001	-0.001
62	63	0.863	0	0.708	-0.011	0.004	0.012	0.002	-0.019	-0.095	0.008	0.018	0.034	-0.088	0	0.004	0.011	0	0	0	0.031	0	0	0.003	0	0	0	0
65	66	0.91	0.708	0	0.008	-0.011	0.009	0.006	-0.02	-0.088	0.007	0.013	0.002	-0.06	0	0	0	0	0	0	-0.318	0.082	0.001	0.001	-0.019	0	0	-0.001
72	73	0	-0.011	0.008	0	-9.046	0.05	-0.058	-0.221	-0.292	0.457	-0.317	0	0	0	0	0	0	0	0	0	0	0	0	0	0	0	0
73	74	-0.01	0.004	-0.011	-9.046	0	-0.387	0.195	-0.266	-0.429	1.451	-0.089	0	0	0	0	0	0	0	0	0	0	0	0	0	0	0	0
75	76	0	0.012	0.009	0.05	-0.387	0	-12.172	-13.236	0.083	-0.201	3.219	0	0	0	0	0	0	0	0	0	0	0	0	0	0	0	0
76	77	0	0.002	0.006	-0.058	0.195	-12.172	0	-13.74	-0.218	-0.192	-0.038	0	0	0	0	0	0	0	0	0	0	0	0	0	0	0	0
77	78	0	-0.019	-0.02	-0.221	-0.266	-13.236	-13.74	0	-0.136	-0.188	-0.082	0	0	0	0	0	0	0	0	0	0	0	0	0	0	0	0
79	80	0	-0.095	-0.088	-0.292	-0.429	0.083	-0.218	-0.136	0	-13.227	-12.408	0	0	0	0	0	0	0	0	0.001	0	0	0	0	0	0	0
80	81	0	0.008	0.007	0.457	1.451	-0.201	-0.192	-0.188	-13.227	0	-12.57	0	0	0	0	0	0	0	0	0	0	0	0	0	0	0	0
81	82	0.014	0.018	0.013	-0.317	-0.089	3.219	-0.038	-0.082	-12.408	-12.57	0	0	0	0	0	0	0	0	0	0	0	0	0	0	0	0	0
85	86	-0.14	0.034	0.002	0	0	0	0	0	0	0	0	0	5.241	-0.192	-0.222	-0.375	-0.02	-0.034	-0.026	0	0	0	0	0	0	0	0
87	88	-0.068	-0.088	-0.06	0	0	0	0	0	0	0	0	5.241	0	13.598	4.953	2.908	0.015	0.127	0.116	0	0	0	0	0	0	0	0
89	90	0	0	0	0	0	0	0	0	0	0	0	-0.192	13.598	0	-11.619	-13.032	0.003	-0.026	-0.022	0	0	0	0	0	0	0	0
90	91	0.002	0.004	0	0	0	0	0	0	0	0	0	-0.222	4.953	-11.619	0	-14.278	0.001	0.082	0.017	0	0	0	0	0	0	0	0
91	92	0.011	0.011	0	0	0	0	0	0	0	0	0	-0.375	2.908	-13.032	-14.278	0	-0.001	0.023	0.007	0	0	0	0	0	0	0	0
96	97	0	0	0	0	0	0	0	0	0	0	0	-0.02	0.015	0.003	0.001	-0.001	0	-10.575	-10.769	0	0	0	0	0	0	0	0
97	98	0	0	0	0	0	0	0	0	0	0	0	-0.034	0.127	-0.026	0.082	0.023	-10.575	0	-10.45	0	0	0	0	0	0	0	0
98	99	0	0	0	0	0	0	0	0	0	0	0	-0.026	0.116	-0.022	0.017	0.007	-10.769	-10.45	0	0	0	0	0	0	0	0	0
102	103	0.06	0.031	-0.318	0	0	0	0	0	0.001	0	0	0	0	0	0	0	0	0	0	0	9.707	-0.115	-0.149	-0.338	-0.013	0.005	-0.009
104	105	-0.008	0	0.082	0	0	0	0	0	0	0	0	0	0	0	0	0	0	0	0	9.707	0	13.014	4.368	3.318	0.603	0.04	0.654
106	107	0.006	0	0.001	0	0	0	0	0	0	0	0	0	0	0	0	0	0	0	0	-0.115	13.014	0	-12.089	-12.853	-0.003	-0.002	0.005
107	108	0.005	0.003	0.001	0	0	0	0	0	0	0	0	0	0	0	0	0	0	0	0	-0.149	4.368	-12.089	0	-13.194	-0.07	0.059	-0.064
108	109	-0.016	0	-0.019	0	0	0	0	0	0	0	0	0	0	0	0	0	0	0	0	-0.338	3.318	-12.853	-13.194	0	-0.01	0.01	-0.002
113	114	0	0	0	0	0	0	0	0	0	0	0	0	0	0	0	0	0	0	0	-0.013	0.603	-0.003	-0.07	-0.01	0	-11.292	-10.099
114	115	-0.001	0	0	0	0	0	0	0	0	0	0	0	0	0	0	0	0	0	0	0.005	0.04	-0.002	0.059	0.01	-11.292	0	-9.956
115	116	-0.001	0	-0.001	0	0	0	0	0	0	0	0	0	0	0	0	0	0	0	0	-0.009	0.654	0.005	-0.064	-0.002	-10.099	-9.956	0
residual:	0.654
										L1-L2
orca lab		1	4	7	14	15	17	18	19	21	22	23	27	29	31	32	33	38	39	40	44	46	48	49	50	55	56	57
	lab	2	5	8	15	16	18	19	20	22	23	24	28	30	32	33	34	39	40	41	45	47	49	50	51	56	57	58
59	60	0.002	-0.013	0.003	-0.003	0.003	0.001	0.002	0.001	-0.023	0.006	-0.126	-0.001	0	-0.001	-0.001	0	0	0	0	0.005	-0.001	0	0	0	0	0	0
62	63	0.005	-0.016	-0.001	0	0	0	0	0	0	-0.001	-0.001	0.002	0.004	-0.004	-0.154	-0.035	0	0	0	0.007	-0.001	0	0	0	0	0	0
65	66	-0.009	-0.013	-0.01	0	0	0	0	0	0	0	-0.001	0	0	0.001	0	0	0	0	0	-0.035	0.001	0	0	0	0	0	0
72	73	0.003	-0.001	0	0	0	0	0	0	0	0	0	-0.003	0	0	-0.002	0	0	0	0	0	0.003	0	0	0	0	0	0
73	74	-0.004	-0.001	-0.001	0	0	0	0	0	0	0	0	0	0	0	-0.001	0	0	0	0	0.002	0.001	0.001	0	0.001	0	0	0
75	76	-0.099	-0.001	-0.003	0	0	0	0	0	0	0	0	-0.001	0	0	0	0	0	0	0	0.003	-0.003	-0.003	0	-0.001	0	0	0
76	77	0.002	0	-0.001	0	0	0	0	0	0	0	0	0	0	0	0	0	0	0	0	-0.025	-0.057	-0.059	-0.001	-0.011	0.001	0	0
77	78	-0.01	0	0	0	0	0	0	0	0	0	0	-0.001	0	0	0	0	0	0	0	0.033	-0.01	-0.006	0.001	-0.003	0	0	0
79	80	0.005	0	0	0	0	0	0	0	0	0	0	0	0	0	0	0	0	0	0	0.018	-0.003	0	0	0.001	0	0	0
80	81	0	0	0	0	0	0	0	0	0	0	0	0	0	0	0	0	0	0	0	0.001	-0.022	0	0	0.001	0	0	0
81	82	0	0	0	0	0	0	0	0	0	0	0	0	0	0	0	0	0	0	0	-0.005	-0.002	0	0	0	0	0	0
85	86	0	-0.041	0.002	0.007	0.002	0.002	0.003	-0.001	0.012	-0.026	0.003	0.001	0.001	0.003	0.001	0.001	0	0	0	0	0	0	0	0	0	0	0
87	88	0	-0.007	0	-0.001	-0.002	-0.002	0.011	-0.001	-0.003	-0.007	-0.001	0.008	0	-0.008	-0.003	0	-0.001	-0.001	0	0	0	0	0	0	0	0	0
89	90	0	-0.001	0	-0.001	0	-0.19	-0.008	-0.017	0.002	0.015	0	0	0.001	0	0	0	0	0	0	0	0	0	0	0	0	0	0
90	91	0	-0.002	0	-0.001	-0.001	-0.106	-0.012	-0.012	-0.011	-0.157	-0.028	-0.004	0	0.002	0	0	0	0	0	0	0	0	0	0	0	0	0
91	92	0	0	0	-0.001	-0.001	-0.019	0.008	-0.003	0.007	-0.017	-0.009	0	0	0	0	0	0	0	0	0	0	0	0	0	0	0	0
96	97	0	0	0	0	0	0	0	0	0	0	0	0.001	-0.001	-0.003	0.007	-0.002	-0.016	-0.005	0	0	0	0	0	0	0	0	0
97	98	0	0	0	0	0	0	0	0	0	0	0	0	-0.004	-0.014	-0.001	-0.003	-0.138	0.02	0.017	0	0	0	0	0	0	0	0
98	99	0	0	0	0	0	0	0	0	0	0	0	-0.002	-0.008	-0.088	-0.004	-0.004	0.017	0.026	0.012	0	0	0	0	0	0	0	0
102	103	-0.001	0	-0.001	0	-0.001	0	0	0	-0.001	0	-0.004	0	0	0	0	0	0	0	0	0.001	-0.002	0.003	0	0	0.001	0.001	0
104	105	0	0	0.005	-0.006	-0.001	0	0	0	0	0	0	0	0	0	0	0	0	0	0	-0.001	0	0	0	0	0.011	0.013	-0.004
106	107	0	0	0	0	0	0	0	0	0	0	0	0	0	0	0	0	0	0	0	0	0.001	-0.001	0	0	-0.029	-0.002	0.001
107	108	0	0	0.001	0	0	0	0	0	0	0	0	0	0	0	0	0	0	0	0	0	0	0	0	0	-0.004	0.003	0.001
108	109	0	0	0.003	0	0	0	0	0	0	0	0	0	0	0	0	0	0	0	0	0	0	0	0	0	-0.004	-0.003	0.001
113	114	-0.001	-0.001	-0.002	0	0	0	0	0	0	0	0	0	0	0	0	0	0	0	0	0.007	-0.001	0	0	0	-0.019	-0.007	-0.092
114	115	0	0	-0.043	0	0	0	0	0	0	0	0	0	0	0	0	0	0	0	0	0.005	0	0	0	0	-0.002	-0.001	-0.01
115	116	-0.001	-0.001	0.015	0	0	0	0	0	0	0	0	0	0	0	0	0	0	0	0	0.015	-0.001	0	0	0	-0.006	-0.001	-0.018
								residual:	0.19
2-bond
J(15-16)	J(18-19)	J(22-23)	J(32-33)	J(39-40)
-9.077	-12.9362	-12.8955	-12.9218	-10.5788
3-bond
J(28-30)	J(30-32)
8.05775	7.00983
4-bond
J(2-5)	J(5-8)	J(15-18)	J(16-18)	J(18-22)	J(28-32)
0.89275	0.685	0.126667	-0.0911667	0.245944	-0.194

## Sheet: CONF9
Orca lab.	Lab	sigma	Av(258K)	Av(298K)	C1(shift(TMS))	C2(shift(TMS))	ExpSh(258K)	ExpSh(298K)	CalSh(258K)	CalSh(298K)			Orca lab.	Lab	sigma	Av(sigma)	C(shift(TMS))	E(shift)	C(shift)
1H	1H	1H	1H	1H	1H	1H	1H	1H	1H	1H			13C	13C	13C	13C	13C	13C	13C
1	2	22.59	22.612	22.612	9.12	9.12	8.22	8.29	8.36303	8.45558			0	1	43.47	43.588	146.71	129.679	129.838
4	5	22.777	23.0203	23.0203	8.71175	8.71175	8.19	8.29	7.974	8.05945			2	3	37.431	40.326	149.972	134.903	132.856
7	8	23.102											3	4	41.25	43.1617	147.136	129.083	130.232
14	15	26.691	26.7625	26.8667	4.9695	4.86525	4.19	4.16	4.40801	4.32719			5	6	46.458	46.583	143.715	128.334	127.067
15	16	26.927	26.971		4.761		4.17		4.20933				6	7	45.028
17	18	29.914	30.0605	30.0605	1.6715	1.6715	1.42	1.41	1.26535	1.2283			8	9	43.55
18	19	30.064											10	11	7.277	7.696	182.602	161.781	163.049
19	20	30.068											12	13	110.35	110.309	79.9885	67.472	68.1006
21	22	29.857	29.5708	29.5708	2.16117	2.16117	1.53	1.465	1.73195	1.70342			13	14	98.204	98.432	91.866	79.352	79.0909
22	23	29.607											16	17	154.151	155.311	34.9872	27.002	26.461
23	24	29.184											20	21	156.566
27	28	22.314	22.0702	22.0702	9.66175	9.66175	8.12	7.615	8.87926	8.98124			24	25	6.546	7.04575	183.252	166.965	163.651
29	30	26.058	26.4032	26.4032	5.32875	5.32875	4.86	4.84	4.75034	4.77693			28	29	132.288	130.28	60.018	48.85	49.6219
31	32	29.748	29.8045	29.8045	1.9275	1.9275	1.61	1.57	1.50929	1.47669			30	31	166.514	167.22	23.078	15.823	15.4413
32	33	30.152											34	35	-3.853	-6.4345	196.733	173.23	176.124
33	34	29.969											37	38	127.964	127.261	63.0367	51.445	52.4152
38	39	27.465	27.4006	27.4006	4.33142	4.33142	3.82	3.81	3.79998	3.80921			41	42	9.278
39	40	27.588											45	46	130.655			MAE:	1.20408
40	41	27.036						MAE(C-H):	0.133706	0.142576			47	48	166.553
44	45	22.355						AE(N-H):	0.759259	1.36624			51	52	-8.998
46	47	26.084											54	55	126.415
48	49	29.905
49	50	29.604											58	59	43.706
50	51	29.887											60	61	36.508
55	56	26.972											61	62	40.635
56	57	27.389											63	64	46.708
57	58	27.538											64	65	45.734
													66	67	43.815
59	60	22.634											68	69	8.115
62	63	22.985											70	71	110.269
65	66	23.217											71	72	98.66
72	73	26.834											74	75	154.147
73	74	27.015											78	79	156.379
75	76	30.232											82	83	4.757
76	77	29.938											86	87	129.519
77	78	30.147											88	89	168.064
79	80	29.517											92	93	-3.532
80	81	29.367											95	96	128.12
81	82	29.893											99	100	7.602
85	86	21.345											103	104	128.658
87	88	27.052											105	106	167.749
89	90	29.772											109	110	-9.355
90	91	29.467											112	113	126.546
91	92	30.083
96	97	27.674
97	98	27.768
98	99	27.494
102	103	22.267
104	105	26.419
106	107	29.8
107	108	29.527
108	109	29.74
113	114	27.113
114	115	27.375
115	116	27.395
										L1
orca lab		1	4	7	14	15	17	18	19	21	22	23	27	29	31	32	33	38	39	40	44	46	48	49	50	55	56	57
	Lab.	2	5	8	15	16	18	19	20	22	23	24	28	30	32	33	34	39	40	41	45	47	49	50	51	56	57	58
1	2	0	0.919	0.925	-0.012	0	0	0	0.012	0	0	0	-0.259	0.081	0.002	0.001	-0.016	-0.001	0	0	0.054	-0.032	0.005	-0.001	0.004	0	0	0.001
4	5	0.919	0	0.638	-0.01	0.014	0.007	-0.087	0.012	-0.019	0.005	0.009	0.047	-0.009	0.007	0.004	-0.014	-0.001	0	0	0.029	-0.018	0	0	0	0	0	0
7	8	0.925	0.638	0	0.002	-0.003	0.007	-0.09	0.016	-0.014	0.002	0.011	0.012	-0.004	0	0	0	0	0	0	-0.332	0.038	0	-0.001	0.001	0	0	0.001
14	15	-0.012	-0.01	0.002	0	-8.602	1.301	-0.407	-0.051	-0.269	0.242	-0.39	0	0	0	0	0	0	0	0	0	0	0	0	0	0	0	0
15	16	0	0.014	-0.003	-8.602	0	0.442	-0.292	-0.334	-0.232	0.053	0.06	0	0	0	0	0	0	0	0	0	0	0	0	0	0	0	0
17	18	0	0.007	0.007	1.301	0.442	0	-13.183	-12.537	-0.207	-0.186	-0.192	0	0	0	0	0	0	0	0	0	0	0	0	0	0	0	0
18	19	0	-0.087	-0.09	-0.407	-0.292	-13.183	0	-12.336	-0.16	-0.222	0.049	0	0	0	0	0	0	0	0	0	0	0	0	0	0	0	0
19	20	0.012	0.012	0.016	-0.051	-0.334	-12.537	-12.336	0	-0.09	-0.062	3.171	0	0	0	0	0	0	0	0	0	0	0	0	0	0	0	0
21	22	0	-0.019	-0.014	-0.269	-0.232	-0.207	-0.16	-0.09	0	-13.492	-13.118	0	0	0	0	0	0	0	0	0	0	0	0	0	0	0	0
22	23	0	0.005	0.002	0.242	0.053	-0.186	-0.222	-0.062	-13.492	0	-12.221	0	0	0	0	0	0	0	0	0	0	0	0	0	0	0	0
23	24	0	0.009	0.011	-0.39	0.06	-0.192	0.049	3.171	-13.118	-12.221	0	0	0	0	0	0	0	0	0	0	0	0	0	0	0	0	0
27	28	-0.259	0.047	0.012	0	0	0	0	0	0	0	0	0	8.696	-0.13	-0.111	-0.219	-0.018	-0.022	0	0	0	0	0	0	0	0	0
29	30	0.081	-0.009	-0.004	0	0	0	0	0	0	0	0	8.696	0	13.426	3.96	3.114	0.423	0.443	0.037	0	0	0	0	0	0	0	0
31	32	0.002	0.007	0	0	0	0	0	0	0	0	0	-0.13	13.426	0	-12.363	-12.997	-0.003	0.012	0.008	0	0	0	0	0	0	0	0
32	33	0.001	0.004	0	0	0	0	0	0	0	0	0	-0.111	3.96	-12.363	0	-13.148	-0.052	-0.053	0.069	0	0	0	0	0	0	0	0
33	34	-0.016	-0.014	0	0	0	0	0	0	0	0	0	-0.219	3.114	-12.997	-13.148	0	-0.003	-0.006	0.005	0	0	0	0	0	0	0	0
38	39	-0.001	-0.001	0	0	0	0	0	0	0	0	0	-0.018	0.423	-0.003	-0.052	-0.003	0	-10.381	-10.482	0	0	0	0	0	0	0	0
39	40	0	0	0	0	0	0	0	0	0	0	0	-0.022	0.443	0.012	-0.053	-0.006	-10.381	0	-10.605	0	0	0	0	0	0	0	0
40	41	0	0	0	0	0	0	0	0	0	0	0	0	0.037	0.008	0.069	0.005	-10.482	-10.605	0	0	0	0	0	0	0	0	0
44	45	0.054	0.029	-0.332	0	0	0	0	0	0	0	0	0	0	0	0	0	0	0	0	0	9.234	-0.415	-0.155	-0.188	-0.006	-0.015	-0.014
46	47	-0.032	-0.018	0.038	0	0	0	0	0	0	0	0	0	0	0	0	0	0	0	0	9.234	0	2.868	13.655	4.983	0.061	0.022	0.069
48	49	0.005	0	0	0	0	0	0	0	0	0	0	0	0	0	0	0	0	0	0	-0.415	2.868	0	-13.093	-13.73	-0.003	-0.001	0.024
49	50	-0.001	0	-0.001	0	0	0	0	0	0	0	0	0	0	0	0	0	0	0	0	-0.155	13.655	-13.093	0	-12.564	-0.013	0.011	-0.021
50	51	0.004	0	0.001	0	0	0	0	0	0	0	0	0	0	0	0	0	0	0	0	-0.188	4.983	-13.73	-12.564	0	-0.005	-0.01	0.078
55	56	0	0	0	0	0	0	0	0	0	0	0	0	0	0	0	0	0	0	0	-0.006	0.061	-0.003	-0.013	-0.005	0	-10.341	-11.083
56	57	0	0	0	0	0	0	0	0	0	0	0	0	0	0	0	0	0	0	0	-0.015	0.022	-0.001	0.011	-0.01	-10.341	0	-10.736
57	58	0.001	0	0.001	0	0	0	0	0	0	0	0	0	0	0	0	0	0	0	0	-0.014	0.069	0.024	-0.021	0.078	-11.083	-10.736	0
residual:	0.443
										L2
orca lab		59	62	65	72	73	75	76	77	79	80	81	85	87	89	90	91	96	97	98	102	104	106	107	108	113	114	115
	lab	60	63	66	73	74	76	77	78	80	81	82	86	88	90	91	92	97	98	99	103	105	107	108	109	114	115	116
59	60	0	0.832	0.949	-0.011	0	0.013	0	0	0	0	0	-0.163	0.021	-0.013	0.002	0.003	0	0	0	0.059	-0.066	0.01	-0.001	0.001	0	0	0
62	63	0.832	0	0.648	-0.007	0.009	0.013	0.007	-0.092	0.006	0.01	-0.023	0.038	-0.009	-0.002	0.006	0.003	0	0	-0.001	0.035	-0.044	0	0	0	0	0	0
65	66	0.949	0.648	0	0.005	-0.005	0.017	0.008	-0.095	0.002	0.012	-0.018	0.006	0	0	0.002	0.002	0	0	0	-0.298	-0.01	0.006	-0.002	0	0	0	0.001
72	73	-0.011	-0.007	0.005	0	-8.739	-0.063	1.316	-0.416	0.247	-0.37	-0.273	0	0	0	0	0	0	0	0	0	0	0	0	0	0	0	0
73	74	0	0.009	-0.005	-8.739	0	-0.32	0.448	-0.302	0.039	0.064	-0.239	0	0	0	0	0	0	0	0	0	0	0	0	0	0	0	0
75	76	0.013	0.013	0.017	-0.063	-0.32	0	-12.377	-12.402	-0.019	3.207	-0.101	0	0	0	0	0	0	0	0	0	0	0	0	0	0	0	0
76	77	0	0.007	0.008	1.316	0.448	-12.377	0	-13.431	-0.192	-0.181	-0.204	0	0	0	0	0	0	0	0	0	0	0	0	0	0	0	0
77	78	0	-0.092	-0.095	-0.416	-0.302	-12.402	-13.431	0	-0.221	0.059	-0.155	0	0	0	0	0	0	0	0	0	0	0	0	0	0	0	0
79	80	0	0.006	0.002	0.247	0.039	-0.019	-0.192	-0.221	0	-12.042	-13.822	0	0	0	0	0	0	0	0	0	0	0	0	0	0	0	0
80	81	0	0.01	0.012	-0.37	0.064	3.207	-0.181	0.059	-12.042	0	-13.222	0	0	0	0	0	0	0	0	0	0	0	0	0	0	0	0
81	82	0	-0.023	-0.018	-0.273	-0.239	-0.101	-0.204	-0.155	-13.822	-13.222	0	0	0	0	0	0	0	0	0	0	0	0	0	0	0	0	0
85	86	-0.163	0.038	0.006	0	0	0	0	0	0	0	0	0	6.093	-0.315	-0.196	-0.177	-0.001	-0.012	-0.023	0	0	0	0	0	0	0	0
87	88	0.021	-0.009	0	0	0	0	0	0	0	0	0	6.093	0	3.121	13.019	4.23	0.537	0.039	0.547	0	0	0	0	0	0	0	0
89	90	-0.013	-0.002	0	0	0	0	0	0	0	0	0	-0.315	3.121	0	-12.974	-13.409	-0.008	0.009	-0.002	0	0	0	0	0	0	0	0
90	91	0.002	0.006	0.002	0	0	0	0	0	0	0	0	-0.196	13.019	-12.974	0	-12.262	0.005	0	0.004	0	0	0	0	0	0	0	0
91	92	0.003	0.003	0.002	0	0	0	0	0	0	0	0	-0.177	4.23	-13.409	-12.262	0	-0.063	0.067	-0.06	0	0	0	0	0	0	0	0
96	97	0	0	0	0	0	0	0	0	0	0	0	-0.001	0.537	-0.008	0.005	-0.063	0	-10.633	-10.33	0	0	0	0	0	0	0	0
97	98	0	0	0	0	0	0	0	0	0	0	0	-0.012	0.039	0.009	0	0.067	-10.633	0	-10.23	0	0	0	0	0	0	0	0
98	99	0	-0.001	0	0	0	0	0	0	0	0	0	-0.023	0.547	-0.002	0.004	-0.06	-10.33	-10.23	0	0	0	0	0	0	0	0	0
102	103	0.059	0.035	-0.298	0	0	0	0	0	0	0	0	0	0	0	0	0	0	0	0	0	7.496	-0.402	-0.172	-0.213	-0.016	-0.019	-0.017
104	105	-0.066	-0.044	-0.01	0	0	0	0	0	0	0	0	0	0	0	0	0	0	0	0	7.496	0	3.268	13.863	4.9	0.147	0.019	0.144
106	107	0.01	0	0.006	0	0	0	0	0	0	0	0	0	0	0	0	0	0	0	0	-0.402	3.268	0	-13.018	-13.895	0.01	-0.001	0.02
107	108	-0.001	0	-0.002	0	0	0	0	0	0	0	0	0	0	0	0	0	0	0	0	-0.172	13.863	-13.018	0	-12.634	-0.021	0.002	-0.026
108	109	0.001	0	0	0	0	0	0	0	0	0	0	0	0	0	0	0	0	0	0	-0.213	4.9	-13.895	-12.634	0	0.023	-0.001	0.094
113	114	0	0	0	0	0	0	0	0	0	0	0	0	0	0	0	0	0	0	0	-0.016	0.147	0.01	-0.021	0.023	0	-10.608	-10.786
114	115	0	0	0	0	0	0	0	0	0	0	0	0	0	0	0	0	0	0	0	-0.019	0.019	-0.001	0.002	-0.001	-10.608	0	-10.55
115	116	0	0	0.001	0	0	0	0	0	0	0	0	0	0	0	0	0	0	0	0	-0.017	0.144	0.02	-0.026	0.094	-10.786	-10.55	0
residual:	0.547
										L1-L2
orca lab		1	4	7	14	15	17	18	19	21	22	23	27	29	31	32	33	38	39	40	44	46	48	49	50	55	56	57
	lab	2	5	8	15	16	18	19	20	22	23	24	28	30	32	33	34	39	40	41	45	47	49	50	51	56	57	58
59	60	-0.002	-0.003	-0.008	-0.004	0	0	0.003	0	-0.009	0.003	-0.09	0.004	-0.001	0	0	0	0.002	0	0	0	0	0	0	0	0	0	0
62	63	-0.006	-0.012	-0.016	-0.001	0	0	0	0	0	0	-0.002	-0.024	0.007	0	0.001	0	0.054	-0.001	-0.012	0	0	0	0	0	0	0	0
65	66	-0.007	-0.014	-0.009	-0.001	-0.001	0	0	0	0	0	0	0.006	-0.001	0	0	0	0.002	0	0.001	0.001	0.003	0.001	0	-0.002	-0.006	0.001	-0.005
72	73	-0.005	-0.002	-0.003	0	0	0	0	0	0	0	0	0.003	0.001	0.001	0	0.001	0.001	0	0	0.001	0.001	-0.001	0	0	0.011	0.006	0.013
73	74	0	0	-0.002	0	0	0	0	0	0	0	0	-0.006	0.002	-0.002	-0.001	0.001	0	0.001	0	-0.003	0.003	0	0	0	0.002	0.015	0.07
75	76	0	0	0	0	0	0	0	0	0	0	0	-0.004	0.001	0	0	0	-0.002	-0.01	-0.002	0	0	0	0	0	0	0	0
76	77	0.001	0	0	0	0	0	0	0	0	0	0	0.001	0	0	0.001	0	-0.006	-0.029	-0.002	0	0	0	0	0	0.001	0.001	0
77	78	0.004	0	0	0	0	0	0	0	0	0	0	0.013	-0.002	0	0	0	0	-0.003	0	0	0	0	0	0	0	0	0
79	80	0.003	0	0	0	0	0	0	0	0	0	0	-0.02	-0.012	-0.195	-0.027	-0.017	0	0	0	0	0	0	0	0	0.002	0.002	0
80	81	-0.092	-0.002	-0.001	0	0	0	0	0	0	0	0	-0.008	0.003	0.002	-0.001	0.003	0	0	0	-0.002	0	0	0	0	0	0	0
81	82	-0.01	0	-0.001	0	0	0	0	0	0	0	0	0.02	0.002	-0.015	-0.007	0.006	0	0	0	-0.001	0	0	0	0	0	0	0
85	86	0.004	-0.034	0.006	0.005	-0.004	0.002	0.013	-0.004	0.018	-0.016	0	0	0	0	0	0	0	-0.001	-0.008	0	0	0	0	0	0	0	0
87	88	0	0	-0.001	0	0.002	-0.011	-0.002	-0.001	-0.004	-0.037	-0.002	0	0	0	0	0	0	0	0	0	0	0	0	0	0	0	0
89	90	0	0.003	0	0	0	0	0	0	0.002	0.001	0	0	0	0	0	0	0	0	0	0	0	0	0	0	0	0	0
90	91	0	0	0	0	0	0	0	0	0.004	0.004	-0.002	0	-0.002	0	0	0	0	0	0	0	0	0	0	0	0	0	0
91	92	-0.001	-0.048	-0.001	0	0	0	0	0	0	-0.001	0	0	0	0	0	0	0	0	0	0	0	0	0	0	0	0	0
96	97	0	0	0	0	0	0	0	0	0	0	0	0	0	0	0	0	0	0	0	0	0	0	0	0	0	0	0
97	98	0	0	0	0	0	0	0	0	0	0	0	0	0	0	0	0	0	0	0	0	0	0	0	0	0	0	0
98	99	0	0	0	0	0	0	0	0	0	0	0	0	0	0	0	0	0	0	0	0	0	0	0	0	0	0	0
102	103	0	0	-0.001	0.002	0.005	0	0	0	-0.002	0	-0.003	0	0	0	0	0	0	0	0	-0.008	0.006	0	0	-0.002	0.001	0.001	0.003
104	105	0	0	-0.005	-0.002	0.002	0	0	0	0	0	0	0	0	0	0	0	0	0	0	0.003	0.007	-0.005	-0.006	0.009	-0.001	0	-0.001
106	107	0	0	0	0	0	0	0	0	0	0	0	0	0	0	0	0	0	0	0	0	-0.006	0.003	-0.006	-0.008	0.001	0	0.001
107	108	0	0	0	0	0	0	0	0	0	0	0	0	0	0	0	0	0	0	0	-0.001	-0.012	-0.003	-0.246	-0.06	0	0	0
108	109	0	0	-0.001	0	0	0	0	0	0	0	0	0	0	0	0	0	0	0	0	0	0.009	-0.007	-0.059	-0.005	0	0	0
113	114	0	0	-0.004	0.005	-0.014	0.002	0	0.001	0	0.001	0	0	0	0	0	0	0	0	0	0.003	-0.001	0.001	0	0	0	0	0
114	115	0	0	0	-0.001	-0.003	0	0	0	0	0	0	0	0	0	0	0	0	0	0	0.001	0	0	0	0	0	0	0
115	116	0	0	-0.005	0.021	0.007	0	0	0	0	0	0	0	0	0	0	0	0	0	0	0.002	0	0.001	-0.001	0	0	0	0
								residual:	0.246
2-bond
J(15-16)	J(18-19)	J(22-23)	J(32-33)	J(39-40)
-8.6705	-12.711	-12.9862	-13.0073	-10.5638
3-bond
J(28-30)	J(30-32)
7.87975	7.03392
4-bond
J(2-5)	J(5-8)	J(15-18)	J(16-18)	J(18-22)	J(28-32)
0.90625	0.643	0.11875	-0.0975833	0.238556	-0.224417

## Sheet: CONF10
Orca lab.	Lab	sigma	Av(258K)	Av(298K)	C1(shift(TMS))	C2(shift(TMS))	ExpSh(258K)	ExpSh(298K)	CalSh(258K)	CalSh(298K)			Orca lab.	Lab	sigma	Av(sigma)	C(shift(TMS))	E(shift)	C(shift)
1H	1H	1H	1H	1H	1H	1H	1H	1H	1H	1H			13C	13C	13C	13C	13C	13C	13C
1	2	23.106	23.104	23.104	8.628	8.628	8.22	8.29	7.82587	7.89341			0	1	43.917	43.932	146.366	129.679	130.296
4	5	22.71	22.6148	22.6148	9.11725	9.11725	8.19	8.29	8.28141	8.35722			2	3	44.175	42.315	147.983	134.903	131.81
7	8	22.522											3	4	42.147	43.7943	146.504	129.083	130.425
14	15	26.938	26.9385	27.023	4.7935	4.709	4.19	4.16	4.25556	4.1782			5	6	47.551	47.525	142.773	128.334	126.932
15	16	27.112	27.1075		4.6245		4.17		4.09821				6	7	45.475
17	18	29.985	29.8575	29.8575	1.8745	1.8745	1.42	1.41	1.53768	1.49109			8	9	40.468
18	19	29.852											10	11	9.804	9.807	180.491	161.781	162.248
19	20	29.749											12	13	110.597	110.586	79.712	67.472	67.8883
21	22	30.13	30.1932	30.1932	1.53883	1.53883	1.53	1.465	1.22514	1.17288			13	14	99.253	99.271	91.027	79.352	78.4826
22	23	30.25											16	17	155.813	155.26	35.0375	27.002	26.0596
23	24	30.204											20	21	154.748
27	28	22.726	22.3483	22.3483	9.38375	9.38375	8.12	7.615	8.52954	8.60986			24	25	11.799	9.6185	180.679	166.965	162.424
29	30	25.817	25.8535	25.8535	5.8785	5.8785	4.86	4.84	5.26581	5.28688			28	29	131.923	131.733	58.5645	48.85	48.0879
31	32	29.752	29.7998	29.7998	1.93225	1.93225	1.61	1.57	1.59145	1.54584			30	31	163.568	164.023	26.2748	15.823	17.855
32	33	29.793											34	35	-7.528	-7.8755	198.173	173.23	178.804
33	34	29.987											37	38	126.96	126.844	63.4535	51.445	52.6655
38	39	27.073	27.3027	27.3027	4.42933	4.42933	3.82	3.81	3.91649	3.91307			41	42	7.43
39	40	27.39											45	46	131.528			MAE:	1.79063
40	41	27.349						MAE(C-H):	0.174031	0.178667			47	48	164.514
44	45	21.974						AE(N-H):	0.409544	0.994859			51	52	-8.241
46	47	25.896											54	55	126.729
48	49	29.674
49	50	29.815											58	59	43.947
50	51	29.775											60	61	40.403
55	56	27.466											61	62	45.48
56	57	27.082											63	64	47.499
57	58	27.446											64	65	42.075
													66	67	44.214
59	60	23.102											68	69	9.81
62	63	22.521											70	71	110.575
65	66	22.706											71	72	99.289
72	73	26.939											74	75	155.784
73	74	27.103											78	79	154.697
75	76	29.747											82	83	7.431
76	77	29.985											86	87	131.529
77	78	29.827											88	89	164.476
79	80	30.126											92	93	-8.209
80	81	30.248											95	96	126.751
81	82	30.201											99	100	11.814
85	86	21.981											103	104	131.954
87	88	25.893											105	106	163.535
89	90	29.775											109	110	-7.524
90	91	29.676											112	113	126.938
91	92	29.815
96	97	27.097
97	98	27.449
98	99	27.467
102	103	22.712
104	105	25.808
106	107	29.796
107	108	29.985
108	109	29.754
113	114	27.39
114	115	27.353
115	116	27.07
										L1
orca lab		1	4	7	14	15	17	18	19	21	22	23	27	29	31	32	33	38	39	40	44	46	48	49	50	55	56	57
	Lab.	2	5	8	15	16	18	19	20	22	23	24	28	30	32	33	34	39	40	41	45	47	49	50	51	56	57	58
1	2	0	1.103	0.674	0	0.001	0	0	0	0	0.014	0	-0.39	0.085	-0.01	0	0.001	0	0	0.001	0.052	-0.004	0.004	0.006	-0.001	0.001	0.001	0
4	5	1.103	0	0.71	-0.012	0.01	-0.031	0.015	0.004	0.009	0.019	-0.089	0.056	-0.005	-0.005	0.002	0.006	0	0	0	0.024	0.004	0	0	0	0	0	0
7	8	0.674	0.71	0	0.001	-0.002	-0.027	0.01	0.007	0.009	0.014	-0.083	0.024	0.008	0	0	0	0	0	0	-0.348	0.093	0.001	0.002	-0.006	0.001	0	0
14	15	0	-0.012	0.001	0	-8.846	-0.24	0.053	-0.029	0.463	-0.318	-0.295	0	0	0	0	0	0	0	0	0	0	0	0	0	0	0	0
15	16	0.001	0.01	-0.002	-8.846	0	-0.245	-0.377	0.238	1.435	-0.078	-0.421	0	0	0	0	0	0	0	0	0	0	0	0	0	0	0	0
17	18	0	-0.031	-0.027	-0.24	-0.245	0	-12.809	-13.396	-0.183	-0.111	-0.131	0	0	0	0	0	0	0	0	0	0	0	0	0	0	0	0
18	19	0	0.015	0.01	0.053	-0.377	-12.809	0	-12.391	-0.214	3.184	0.127	0	0	0	0	0	0	0	0	0	0	0	0	0	0	0	0
19	20	0	0.004	0.007	-0.029	0.238	-13.396	-12.391	0	-0.201	-0.001	-0.214	0	0	0	0	0	0	0	0	0	0	0	0	0	0	0	0
21	22	0	0.009	0.009	0.463	1.435	-0.183	-0.214	-0.201	0	-12.492	-13.033	0	0	0	0	0	0	0	0	0	0	0	0	0	0	0	0
22	23	0.014	0.019	0.014	-0.318	-0.078	-0.111	3.184	-0.001	-12.492	0	-12.288	0	0	0	0	0	0	0	0	0	0	0	0	0	0	0	0
23	24	0	-0.089	-0.083	-0.295	-0.421	-0.131	0.127	-0.214	-13.033	-12.288	0	0	0	0	0	0	0	0	0	0.001	0	0	0	0	0	0	0
27	28	-0.39	0.056	0.024	0	0	0	0	0	0	0	0	0	10.43	-0.367	-0.094	-0.169	-0.006	-0.006	0.01	0	0	0	0	0	0	0	0
29	30	0.085	-0.005	0.008	0	0	0	0	0	0	0	0	10.43	0	3.072	13.488	5.074	0.296	0.033	0.274	0	0	0	0	0	0	0	0
31	32	-0.01	-0.005	0	0	0	0	0	0	0	0	0	-0.367	3.072	0	-12.769	-13.404	0.026	-0.002	0.007	0	0	0	0	0	0	0	0
32	33	0	0.002	0	0	0	0	0	0	0	0	0	-0.094	13.488	-12.769	0	-12.371	-0.025	-0.005	-0.03	0	0	0	0	0	0	0	0
33	34	0.001	0.006	0	0	0	0	0	0	0	0	0	-0.169	5.074	-13.404	-12.371	0	0.09	-0.001	0.128	0	0	0	0	0	0	0	0
38	39	0	0	0	0	0	0	0	0	0	0	0	-0.006	0.296	0.026	-0.025	0.09	0	-10.398	-10.688	0	0	0	0	0	0	0	0
39	40	0	0	0	0	0	0	0	0	0	0	0	-0.006	0.033	-0.002	-0.005	-0.001	-10.398	0	-10.594	0	0	0	0	0	0	0	0
40	41	0.001	0	0	0	0	0	0	0	0	0	0	0.01	0.274	0.007	-0.03	0.128	-10.688	-10.594	0	0	0	0	0	0	0	0	0
44	45	0.052	0.024	-0.348	0	0	0	0	0	0	0	0.001	0	0	0	0	0	0	0	0	0	10.711	-0.103	-0.158	-0.403	0.006	-0.007	0.001
46	47	-0.004	0.004	0.093	0	0	0	0	0	0	0	0	0	0	0	0	0	0	0	0	10.711	0	13.62	4.811	3.023	0.175	0.187	0.03
48	49	0.004	0	0.001	0	0	0	0	0	0	0	0	0	0	0	0	0	0	0	0	-0.103	13.62	0	-12.352	-12.701	-0.03	-0.024	0
49	50	0.006	0	0.002	0	0	0	0	0	0	0	0	0	0	0	0	0	0	0	0	-0.158	4.811	-12.352	0	-13.413	0.124	0.061	-0.003
50	51	-0.001	0	-0.006	0	0	0	0	0	0	0	0	0	0	0	0	0	0	0	0	-0.403	3.023	-12.701	-13.413	0	0.021	0.019	0
55	56	0.001	0	0.001	0	0	0	0	0	0	0	0	0	0	0	0	0	0	0	0	0.006	0.175	-0.03	0.124	0.021	0	-10.5	-10.448
56	57	0.001	0	0	0	0	0	0	0	0	0	0	0	0	0	0	0	0	0	0	-0.007	0.187	-0.024	0.061	0.019	-10.5	0	-10.675
57	58	0	0	0	0	0	0	0	0	0	0	0	0	0	0	0	0	0	0	0	0.001	0.03	0	-0.003	0	-10.448	-10.675	0
residual:	0.39
										L2
orca lab		59	62	65	72	73	75	76	77	79	80	81	85	87	89	90	91	96	97	98	102	104	106	107	108	113	114	115
	lab	60	63	66	73	74	76	77	78	80	81	82	86	88	90	91	92	97	98	99	103	105	107	108	109	114	115	116
59	60	0	0.673	1.103	0	0.001	0	0	0	0	0.014	0	0.052	-0.003	-0.001	0.004	0.006	0.001	0	0.001	-0.388	0.085	0	0.002	-0.011	0	0.001	0
62	63	0.673	0	0.71	0	-0.001	0.007	-0.028	0.01	0.009	0.014	-0.082	-0.35	0.093	-0.006	0.001	0.002	0	0	0.001	0.024	0.008	0	0	0	0	0	0
65	66	1.103	0.71	0	-0.012	0.01	0.004	-0.032	0.015	0.009	0.019	-0.088	0.024	0.004	0	0	0	0	0	0	0.056	-0.005	0.002	0.006	-0.005	0	0	0
72	73	0	0	-0.012	0	-8.866	-0.024	-0.242	0.054	0.463	-0.319	-0.296	0	0	0	0	0	0	0	0	0	0	0	0	0	0	0	0
73	74	0.001	-0.001	0.01	-8.866	0	0.243	-0.246	-0.377	1.427	-0.078	-0.42	0	0	0	0	0	0	0	0	0	0	0	0	0	0	0	0
75	76	0	0.007	0.004	-0.024	0.243	0	-13.458	-12.387	-0.201	-0.001	-0.213	0	0	0	0	0	0	0	0	0	0	0	0	0	0	0	0
76	77	0	-0.028	-0.032	-0.242	-0.246	-13.458	0	-12.82	-0.183	-0.111	-0.131	0	0	0	0	0	0	0	0	0	0	0	0	0	0	0	0
77	78	0	0.01	0.015	0.054	-0.377	-12.387	-12.82	0	-0.214	3.184	0.127	0	0	0	0	0	0	0	0	0	0	0	0	0	0	0	0
79	80	0	0.009	0.009	0.463	1.427	-0.201	-0.183	-0.214	0	-12.487	-13.026	0	0	0	0	0	0	0	0	0	0	0	0	0	0	0	0
80	81	0.014	0.014	0.019	-0.319	-0.078	-0.001	-0.111	3.184	-12.487	0	-12.283	0	0	0	0	0	0	0	0	0	0	0	0	0	0	0	0
81	82	0	-0.082	-0.088	-0.296	-0.42	-0.213	-0.131	0.127	-13.026	-12.283	0	0.001	0	0	0	0	0	0	0	0	0	0	0	0	0	0	0
85	86	0.052	-0.35	0.024	0	0	0	0	0	0	0	0.001	0	10.715	-0.403	-0.103	-0.157	-0.007	0.001	0.006	0	0	0	0	0	0	0	0
87	88	-0.003	0.093	0.004	0	0	0	0	0	0	0	0	10.715	0	3.02	13.615	4.808	0.186	0.03	0.174	0	0	0	0	0	0	0	0
89	90	-0.001	-0.006	0	0	0	0	0	0	0	0	0	-0.403	3.02	0	-12.683	-13.406	0.019	0	0.021	0	0	0	0	0	0	0	0
90	91	0.004	0.001	0	0	0	0	0	0	0	0	0	-0.103	13.615	-12.683	0	-12.354	-0.024	0	-0.03	0	0	0	0	0	0	0	0
91	92	0.006	0.002	0	0	0	0	0	0	0	0	0	-0.157	4.808	-13.406	-12.354	0	0.061	-0.003	0.124	0	0	0	0	0	0	0	0
96	97	0.001	0	0	0	0	0	0	0	0	0	0	-0.007	0.186	0.019	-0.024	0.061	0	-10.672	-10.489	0	0	0	0	0	0	0	0
97	98	0	0	0	0	0	0	0	0	0	0	0	0.001	0.03	0	0	-0.003	-10.672	0	-10.435	0	0	0	0	0	0	0	0
98	99	0.001	0.001	0	0	0	0	0	0	0	0	0	0.006	0.174	0.021	-0.03	0.124	-10.489	-10.435	0	0	0	0	0	0	0	0	0
102	103	-0.388	0.024	0.056	0	0	0	0	0	0	0	0	0	0	0	0	0	0	0	0	0	10.445	-0.093	-0.168	-0.368	-0.005	0.01	-0.006
104	105	0.085	0.008	-0.005	0	0	0	0	0	0	0	0	0	0	0	0	0	0	0	0	10.445	0	13.484	5.081	3.069	0.033	0.277	0.295
106	107	0	0	0.002	0	0	0	0	0	0	0	0	0	0	0	0	0	0	0	0	-0.093	13.484	0	-12.375	-12.77	-0.005	-0.03	-0.025
107	108	0.002	0	0.006	0	0	0	0	0	0	0	0	0	0	0	0	0	0	0	0	-0.168	5.081	-12.375	0	-13.384	-0.001	0.128	0.09
108	109	-0.011	0	-0.005	0	0	0	0	0	0	0	0	0	0	0	0	0	0	0	0	-0.368	3.069	-12.77	-13.384	0	-0.002	0.007	0.026
113	114	0	0	0	0	0	0	0	0	0	0	0	0	0	0	0	0	0	0	0	-0.005	0.033	-0.005	-0.001	-0.002	0	-10.599	-10.366
114	115	0.001	0	0	0	0	0	0	0	0	0	0	0	0	0	0	0	0	0	0	0.01	0.277	-0.03	0.128	0.007	-10.599	0	-10.702
115	116	0	0	0	0	0	0	0	0	0	0	0	0	0	0	0	0	0	0	0	-0.006	0.295	-0.025	0.09	0.026	-10.366	-10.702	0
residual:	0.388
										L1-L2
orca lab		1	4	7	14	15	17	18	19	21	22	23	27	29	31	32	33	38	39	40	44	46	48	49	50	55	56	57
	lab	2	5	8	15	16	18	19	20	22	23	24	28	30	32	33	34	39	40	41	45	47	49	50	51	56	57	58
59	60	-0.029	-0.012	-0.016	0	0	0	0	0	0	0	0	-0.001	0	0	0	0	0	0	0	-0.003	0	0	0	0.001	-0.004	-0.008	0.001
62	63	-0.016	0.001	0	0	0	0	0	0	0	0	0	-0.001	-0.006	0.002	0.001	0	-0.006	0	-0.004	0	0	0	0	0	0	0	0
65	66	-0.012	0.018	0.001	0	0	0	0	0	0	0	0	-0.002	0	0	0	0	0	0	0	0	0	0	0	0	0	0	0
72	73	0	0	0	0	0	0	0	0	0	0	0	0	0	0	0	0	0	0	-0.001	0	0	0	0	0	0	0	0
73	74	0	0	0	0	0	0	0	0	0	0	0	0	0	0	0	0	0	0	-0.001	0	0	0	0	0	0	0	0
75	76	0	0	0	0	0	0	0	0	0	0	0	-0.001	0.001	0	-0.001	0	-0.008	-0.024	0.033	0	0	0	0	0	0	0	0
76	77	0	0	0	0	0	0	0	0	0	0	0	0.006	-0.004	0	0.007	0.001	0.004	-0.005	0.001	0	0	0	0	0	0	0	0
77	78	0	0	0	0	0	0	0	0	0	0	0	0.005	-0.088	0	0.005	0	-0.004	-0.004	0.006	0	0	0	0	0	0	0	0
79	80	0	0	0	0	0	0	0	0	0	0	0	0	0	0	0	0	-0.016	-0.002	0.001	0	0	0	0	0	0	0	0
80	81	0	0	0	0	0	0	0	0	0	0	0	0.001	-0.002	0	0	0	-0.002	0	-0.001	0	0	0	0	0	0	0	0
81	82	0	0	0	0	0	0	0	0	0	0	0	0	0	0	0	0	-0.004	0	-0.001	0	0	0	0	0	0	0	0
85	86	-0.004	0	0	0	0	0	0	0	0	0	0	-0.035	0.007	0	-0.001	0.001	0.002	0.001	0.003	0	-0.001	0	0	0	-0.002	-0.003	0
87	88	0	0	0	0	0	0	0	0	0	0	0	0.007	-0.003	0	0.001	0	-0.001	0	-0.001	-0.001	0	0	0	0	0	0	0
89	90	0.002	0	0	0	0	0	0	0	0	0	0	0	0	0	0	0	0	0	-0.001	0	0	0	0	0	0	0	0
90	91	0	0	0	0	0	0	0	0	0	0	0	0	0.003	0	-0.001	0	-0.002	0	-0.004	0	0	0	0	0	0	0	0
91	92	0	0	0	0	0	0	0	0	0	0	0	-0.002	0.001	0	0	0	-0.001	0	-0.001	0	0	0	0	0	0	0	0
96	97	-0.007	0	0	0	0	0	0	0	0	0	0	0	0	0	-0.001	0	0	0	0	-0.003	0	0	0	0	0	0	0
97	98	0.001	0	0	0	0	0	0	0	0	0	0	0.001	0	0	0	0	0	0	0	0	0	0	0	0	0	0	0
98	99	-0.004	0	0	0	0	0	0	0	0	0	0	0.002	-0.001	0	-0.001	0	0	0	0	-0.002	0	0	0	0	0	0	0
102	103	-0.002	-0.003	-0.001	0	0	0.006	0.004	-0.001	0	0.001	0	0.001	0	0	0	0	0	0	0	-0.035	0.007	0	-0.002	0	0.002	0	0.001
104	105	0	0	-0.006	0	0	-0.005	-0.082	0	0	-0.001	0	0	0	0	0	0	0	0	0	0.007	-0.003	0.003	0.002	0	-0.001	0	0
106	107	0	0	0.001	0	0	0.006	0.005	-0.001	0	0	0	0	0	0	0	0	0	0	0	-0.001	0.001	-0.001	0	0	-0.001	-0.001	0
107	108	0	0	0	0	0	0.001	0	0	0	0	0	0	0	0	0	0	0	0	0	0.001	0	0	0	0	0	0	0
108	109	0	0	0.002	0	0	0	0	0	0	0	0	0	0	0	0	0	0	0	0	0	0	0	0	0	0	0	0
113	114	0	0	0	0	0	-0.005	-0.004	-0.025	-0.001	0	0	0	0	0	0	0	0	0	0	0.001	0	0	0	0	0	0	0
114	115	0	0	-0.004	-0.001	-0.001	0.001	0.005	0.033	0.001	-0.001	-0.001	0	0	0	0	0	0	0	0	0.003	-0.001	-0.004	-0.001	-0.001	0	0	0
115	116	0	0	-0.006	0	0	0.004	-0.004	-0.007	-0.014	-0.002	-0.004	0	0	0	0	0	0	0	0	0.002	-0.001	-0.002	-0.001	0	0	0	0
								residual:	0.088
2-bond
J(15-16)	J(18-19)	J(22-23)	J(32-33)	J(39-40)
-8.856	-12.8768	-12.6015	-12.8318	-10.5472
3-bond
J(28-30)	J(30-32)
10.5753	7.18042
4-bond
J(2-5)	J(5-8)	J(15-18)	J(16-18)	J(18-22)	J(28-32)
0.88825	0.71	0.11975	-0.0888333	0.250722	-0.2155

[truncated: 6 more sheets: CONF11, CONF12, CONF13, CONF14, CONF15, All]
