# Supplementary material for: Oxazoline amino acid bioconjugates: one-pot synthesis and analysis of supramolecular interactions
Source: Royal Society of Chemistry journal article supplement (doi:10.1039/d4nj00995a), 2024-01-01
Supplement: d4nj00995a4.xlsx [file d4nj00995a4.xlsx]

## Sheet: CONF1
Orca lab.	Lab	sigma	Av(258K)	Av(298K)	C1(shift(TMS))	C2(shift(TMS))	ExpSh(258K)	ExpSh(298K)	CalSh(258K)	CalSh(298K)			Orca lab.	Lab	sigma	Av(sigma)	C(shift(TMS))	E(shift)	C(shift)
1H	1H	1H	1H	1H	1H	1H	1H	1H	1H	1H			13C	13C	13C	13C	13C	13C	13C
1	2	22.522	22.522	22.522	9.21	9.21	8.19	8.29	8.16787	8.24899			0	1	44.839	44.839	145.459	129.679	128.998
4	5	22.347	22.247	22.247	9.485	9.485	8.22	8.29	8.41017	8.49597			2	3	39.515	39.8815	150.416	134.903	133.616
7	8	22.147											3	4	42.222	43.3445	146.954	129.083	130.39
14	15	26.845	26.845	26.9835	4.887	4.7485	4.19	4.16	4.35887	4.24212			5	6	46.186	46.186	144.112	128.334	127.743
15	16	27.122	27.122		4.61		4.17		4.11481				6	7	44.467
17	18	29.736	29.9527	29.9527	1.77933	1.77933	1.54	1.465	1.62071	1.57551			8	9	40.248
18	19	29.96											10	11	10.472	10.472	179.826	161.781	161.014
19	20	30.162											12	13	110.288	110.288	80.01	67.472	68.0257
21	22	29.977	30.0757	30.0757	1.65633	1.65633	1.42	1.41	1.51233	1.46504			13	14	98.516	98.516	91.782	79.352	78.9925
22	23	30.139											16	17	155.044	155.044	35.254	27.002	26.331
23	24	30.111											20	21	154.499
27	28	24.465	24.4385	24.4385	7.2935	7.2935	8.12	7.615	6.47924	6.52778			24	25	5.739	5.576	184.722	166.965	165.575
29	30	26.842	26.8385	26.8385	4.8935	4.8935	4.86	4.84	4.3646	4.37234			28	29	129.165	129.086	61.212	48.85	50.5135
31	32	29.791	29.8605	29.8605	1.8715	1.8715	1.61	1.57	1.70191	1.65828			30	31	167.04	167.058	23.2405	15.823	15.1392
32	33	30.095											34	35	-5.192	-5.254	195.552	173.23	175.665
33	34	29.737											37	38	127.604	127.577	62.721	51.445	51.9193
38	39	27.435	27.5177	27.5177	4.21433	4.21433	3.82	3.81	3.76618	3.76238			41	42	5.413
39	40	27.567											45	46	129.007			MAE:	0.989416
40	41	27.575						MAE(C-H):	0.138948	0.137276			47	48	167.075
44	45	24.412						AE(N-H):	1.64076	1.08722			51	52	-5.316
46	47	26.835											54	55	127.55
48	49	29.776
49	50	30.062
50	51	29.702
55	56	27.551
56	57	27.567
57	58	27.411
orca lab		1	4	7	14	15	17	18	19	21	22	23	27	29	31	32	33	38	39	40	44	46	48	49	50	55	56	57
	Lab.	2	5	8	15	16	18	19	20	22	23	24	28	30	32	33	34	39	40	41	45	47	49	50	51	56	57	58
1	2	0	0.961	0.809	0	0.002	0	0	0	0	0.015	0	-0.308	-0.036	0.005	-0.002	-0.001	0	0	0	0.036	-0.078	0.011	-0.001	0.002	0	0	0
4	5	0.961	0	0.768	-0.006	0.011	0.005	-0.038	0.016	0.01	0.02	-0.087	0.038	-0.079	0.011	-0.001	0.002	0	0	0	0.005	-0.057	0	0	0	0	0	0
7	8	0.809	0.768	0	0.007	-0.001	0.007	-0.034	0.011	0.009	0.014	-0.079	0.005	-0.056	0	0	0	0	0	0	-0.31	-0.04	0.005	-0.002	-0.001	0	0	0
14	15	0	-0.006	0.007	0	-8.999	0.112	-0.244	0.057	0.467	-0.339	-0.297	0	0	0	0	0	0	0	0	0	0	0	0	0	0	0	0
15	16	0.002	0.011	-0.001	-8.999	0	0.247	-0.257	-0.408	1.306	-0.042	-0.401	0	0	0	0	0	0	0	0	0	0	0	0	0	0	0	0
17	18	0	0.005	0.007	0.112	0.247	0	-13.281	-12.32	-0.186	-0.043	-0.207	0	0	0	0	0	0	0	0	0	0	0	0	0	0	0	0
18	19	0	-0.038	-0.034	-0.244	-0.257	-13.281	0	-12.53	-0.187	-0.069	-0.154	0	0	0	0	0	0	0	0	0	0	0	0	0	0	0	0
19	20	0	0.016	0.011	0.057	-0.408	-12.32	-12.53	0	-0.185	3.192	0.056	0	0	0	0	0	0	0	0	0	0	0	0	0	0	0	0
21	22	0	0.01	0.009	0.467	1.306	-0.186	-0.187	-0.185	0	-12.546	-13.089	0	0	0	0	0	0	0	0	0	0	0	0	0	0	0	0
22	23	0.015	0.02	0.014	-0.339	-0.042	-0.043	-0.069	3.192	-12.546	0	-12.412	0	0	0	0	0	0	0	0	0	0	0	0	0	0	0	0
23	24	0	-0.087	-0.079	-0.297	-0.401	-0.207	-0.154	0.056	-13.089	-12.412	0	0	0	0	0	0	0	0	0	0	0	0	0	0	0	0	0
27	28	-0.308	0.038	0.005	0	0	0	0	0	0	0	0	0	6.599	-0.419	-0.208	-0.237	-0.021	-0.02	-0.023	0	0.001	0	0	0	0	0	0
29	30	-0.036	-0.079	-0.056	0	0	0	0	0	0	0	0	6.599	0	3.108	13.467	4.794	0.131	0.016	0.12	0	0	0	0	0	0	0	0
31	32	0.005	0.011	0	0	0	0	0	0	0	0	0	-0.419	3.108	0	-13.216	-13.95	0.01	-0.001	0.02	0	0	0	0	0	0	0	0
32	33	-0.002	-0.001	0	0	0	0	0	0	0	0	0	-0.208	13.467	-13.216	0	-11.803	-0.022	0.002	-0.024	0	0	0	0	0	0	0	0
33	34	-0.001	0.002	0	0	0	0	0	0	0	0	0	-0.237	4.794	-13.95	-11.803	0	0.025	0.003	0.081	0	0	0	0	0	0	0	0
38	39	0	0	0	0	0	0	0	0	0	0	0	-0.021	0.131	0.01	-0.022	0.025	0	-10.592	-10.382	0	0	0	0	0	0	0	0
39	40	0	0	0	0	0	0	0	0	0	0	0	-0.02	0.016	-0.001	0.002	0.003	-10.592	0	-10.48	0	0	0	0	0	0	0	0
40	41	0	0	0	0	0	0	0	0	0	0	0	-0.023	0.12	0.02	-0.024	0.081	-10.382	-10.48	0	0	0	0	0	0	0	0	0
44	45	0.036	0.005	-0.31	0	0	0	0	0	0	0	0	0	0	0	0	0	0	0	0	0	6.525	-0.413	-0.201	-0.225	-0.02	-0.024	-0.021
46	47	-0.078	-0.057	-0.04	0	0	0	0	0	0	0	0	0.001	0	0	0	0	0	0	0	6.525	0	3.059	13.425	4.795	0.016	0.113	0.123
48	49	0.011	0	0.005	0	0	0	0	0	0	0	0	0	0	0	0	0	0	0	0	-0.413	3.059	0	-13.181	-13.926	-0.001	0.02	0.008
49	50	-0.001	0	-0.002	0	0	0	0	0	0	0	0	0	0	0	0	0	0	0	0	-0.201	13.425	-13.181	0	-11.774	0.002	-0.023	-0.021
50	51	0.002	0	-0.001	0	0	0	0	0	0	0	0	0	0	0	0	0	0	0	0	-0.225	4.795	-13.926	-11.774	0	0.003	0.079	0.021
55	56	0	0	0	0	0	0	0	0	0	0	0	0	0	0	0	0	0	0	0	-0.02	0.016	-0.001	0.002	0.003	0	-10.438	-10.556
56	57	0	0	0	0	0	0	0	0	0	0	0	0	0	0	0	0	0	0	0	-0.024	0.113	0.02	-0.023	0.079	-10.438	0	-10.427
57	58	0	0	0	0	0	0	0	0	0	0	0	0	0	0	0	0	0	0	0	-0.021	0.123	0.008	-0.021	0.021	-10.556	-10.427	0
residual:	0.31
2-bond
J(15-16)	J(18-19)	J(22-23)	J(32-33)	J(39-40)
-8.999	-12.7103	-12.6823	-12.975	-10.4792
3-bond
J(28-30)	J(30-32)
6.562	7.108
4-bond
J(2-5)	J(5-8)	J(15-18)	J(16-18)	J(18-22)	J(28-32)
0.885	0.768	0.131333	-0.0978333	0.246333	-0.283833

## Sheet: CONF2
Orca lab.	Lab	sigma	Av(258K)	Av(298K)	C1(shift(TMS))	C2(shift(TMS))	ExpSh(258K)	ExpSh(298K)	CalSh(258K)	CalSh(298K)			Orca lab.	Lab	sigma	Av(sigma)	C(shift(TMS))	E(shift)	C(shift)
1H	1H	1H	1H	1H	1H	1H	1H	1H	1H	1H			13C	13C	13C	13C	13C	13C	13C
1	2	22.514	22.514	22.514	9.218	9.218	8.19	8.29	8.17841	8.26167			0	1	44.766	44.766	145.532	129.679	129.131
4	5	21.927	22.2535	22.2535	9.4785	9.4785	8.22	8.29	8.40799	8.49568			2	3	39.682	39.993	150.305	134.903	133.583
7	8	22.58											3	4	40.472	43.2885	147.01	129.083	130.509
14	15	26.862	26.862	27.005	4.87	4.727	4.19	4.16	4.34652	4.22741			5	6	46.069	46.069	144.229	128.334	127.916
15	16	27.148	27.148		4.584		4.17		4.09447				6	7	46.105
17	18	30.181	29.9597	29.9597	1.77233	1.77233	1.54	1.465	1.61655	1.57323			8	9	40.304
18	19	29.714											10	11	11.077	11.077	179.221	161.781	160.55
19	20	29.984											12	13	110.054	110.054	80.244	67.472	68.2436
21	22	29.94	30.059	30.059	1.673	1.673	1.42	1.41	1.529	1.484			13	14	98.605	98.605	91.693	79.352	78.921
22	23	30.129											16	17	155.078	155.078	35.22	27.002	26.2543
23	24	30.108											20	21	154.488
27	28	24.441	24.4565	24.4565	7.2755	7.2755	8.12	7.615	6.46649	6.51673			24	25	6.002	5.7185	184.579	166.965	165.547
29	30	26.853	26.839	26.839	4.893	4.893	4.86	4.84	4.36679	4.37653			28	29	129.118	129.106	61.1915	48.85	50.4753
31	32	29.794	29.8655	29.8655	1.8665	1.8665	1.61	1.57	1.69953	1.65782			30	31	167.094	167.075	23.2235	15.823	15.0663
32	33	30.089											34	35	-5.215	-5.2695	195.567	173.23	175.794
33	34	29.741											37	38	127.603	127.564	62.7335	51.445	51.9133
38	39	27.428	27.5148	27.5148	4.21717	4.21717	3.82	3.81	3.77118	3.76943			41	42	5.435
39	40	27.563											45	46	129.095			MAE:	1.05591
40	41	27.564						MAE(C-H):	0.13875	0.13444			47	48	167.055
44	45	24.472						AE(N-H):	1.65351	1.09827			51	52	-5.324
46	47	26.825											54	55	127.526
48	49	29.768
49	50	30.074
50	51	29.727
55	56	27.55
56	57	27.569
57	58	27.415
orca lab		1	4	7	14	15	17	18	19	21	22	23	27	29	31	32	33	38	39	40	44	46	48	49	50	55	56	57
	Lab.	2	5	8	15	16	18	19	20	22	23	24	28	30	32	33	34	39	40	41	45	47	49	50	51	56	57	58
1	2	0	0.996	0.793	0	0.004	0	0	0	0	0.015	0	-0.318	-0.035	0.005	-0.002	-0.001	0	0	0	0.036	-0.078	0.012	-0.001	0.002	0	0	0
4	5	0.996	0	0.764	0.004	0.001	0.011	0.008	-0.035	0.01	0.014	-0.083	0.041	-0.086	0.011	-0.001	0.003	0	0	0	0.004	-0.056	0	0	0	0	0	0
7	8	0.793	0.764	0	-0.005	0.012	0.015	0.003	-0.036	0.01	0.019	-0.085	0.005	-0.057	0	0	0	0	0	0	-0.319	-0.035	0.005	-0.002	-0.001	0	0	0
14	15	0	0.004	-0.005	0	-8.934	0.059	0.106	-0.241	0.471	-0.331	-0.294	0	0	0	0	0	0	0	0	0	0	0	0	0	0	0	0
15	16	0.004	0.001	0.012	-8.934	0	-0.398	0.254	-0.255	1.319	-0.042	-0.398	0	0	0	0	0	0	0	0	0	0	0	0	0	0	0	0
17	18	0	0.011	0.015	0.059	-0.398	0	-12.428	-12.568	-0.178	3.188	0.067	0	0	0	0	0	0	0	0	0	0	0	0	0	0	0	0
18	19	0	0.008	0.003	0.106	0.254	-12.428	0	-13.268	-0.183	-0.048	-0.206	0	0	0	0	0	0	0	0	0	0	0	0	0	0	0	0
19	20	0	-0.035	-0.036	-0.241	-0.255	-12.568	-13.268	0	-0.186	-0.068	-0.138	0	0	0	0	0	0	0	0	0	0	0	0	0	0	0	0
21	22	0	0.01	0.01	0.471	1.319	-0.178	-0.183	-0.186	0	-12.526	-13.064	0	0	0	0	0	0	0	0	0	0	0	0	0	0	0	0
22	23	0.015	0.014	0.019	-0.331	-0.042	3.188	-0.048	-0.068	-12.526	0	-12.321	0	0	0	0	0	0	0	0	0	0	0	0	0	0	0	0
23	24	0	-0.083	-0.085	-0.294	-0.398	0.067	-0.206	-0.138	-13.064	-12.321	0	0	0	0	0	0	0	0	0	0	0	0	0	0	0	0	0
27	28	-0.318	0.041	0.005	0	0	0	0	0	0	0	0	0	6.381	-0.421	-0.207	-0.238	-0.021	-0.02	-0.025	0	0.001	0	0	0	0	0	0
29	30	-0.035	-0.086	-0.057	0	0	0	0	0	0	0	0	6.381	0	3.111	13.457	4.752	0.124	0.017	0.111	0	0	0	0	0	0	0	0
31	32	0.005	0.011	0	0	0	0	0	0	0	0	0	-0.421	3.111	0	-13.216	-13.954	0.008	-0.001	0.02	0	0	0	0	0	0	0	0
32	33	-0.002	-0.001	0	0	0	0	0	0	0	0	0	-0.207	13.457	-13.216	0	-11.773	-0.022	0.002	-0.023	0	0	0	0	0	0	0	0
33	34	-0.001	0.003	0	0	0	0	0	0	0	0	0	-0.238	4.752	-13.954	-11.773	0	0.023	0.004	0.078	0	0	0	0	0	0	0	0
38	39	0	0	0	0	0	0	0	0	0	0	0	-0.021	0.124	0.008	-0.022	0.023	0	-10.603	-10.393	0	0	0	0	0	0	0	0
39	40	0	0	0	0	0	0	0	0	0	0	0	-0.02	0.017	-0.001	0.002	0.004	-10.603	0	-10.465	0	0	0	0	0	0	0	0
40	41	0	0	0	0	0	0	0	0	0	0	0	-0.025	0.111	0.02	-0.023	0.078	-10.393	-10.465	0	0	0	0	0	0	0	0	0
44	45	0.036	0.004	-0.319	0	0	0	0	0	0	0	0	0	0	0	0	0	0	0	0	0	6.795	-0.406	-0.195	-0.222	-0.02	-0.022	-0.02
46	47	-0.078	-0.056	-0.035	0	0	0	0	0	0	0	0	0.001	0	0	0	0	0	0	0	6.795	0	3.1	13.46	4.776	0.016	0.121	0.131
48	49	0.012	0	0.005	0	0	0	0	0	0	0	0	0	0	0	0	0	0	0	0	-0.406	3.1	0	-13.198	-13.914	-0.001	0.02	0.009
49	50	-0.001	0	-0.002	0	0	0	0	0	0	0	0	0	0	0	0	0	0	0	0	-0.195	13.46	-13.198	0	-11.78	0.002	-0.024	-0.022
50	51	0.002	0	-0.001	0	0	0	0	0	0	0	0	0	0	0	0	0	0	0	0	-0.222	4.776	-13.914	-11.78	0	0.003	0.082	0.024
55	56	0	0	0	0	0	0	0	0	0	0	0	0	0	0	0	0	0	0	0	-0.02	0.016	-0.001	0.002	0.003	0	-10.455	-10.572
56	57	0	0	0	0	0	0	0	0	0	0	0	0	0	0	0	0	0	0	0	-0.022	0.121	0.02	-0.024	0.082	-10.455	0	-10.43
57	58	0	0	0	0	0	0	0	0	0	0	0	0	0	0	0	0	0	0	0	-0.02	0.131	0.009	-0.022	0.024	-10.572	-10.43	0
residual:	0.319
2-bond
J(15-16)	J(18-19)	J(22-23)	J(32-33)	J(39-40)
-8.934	-12.7547	-12.637	-12.9725	-10.4863
3-bond
J(28-30)	J(30-32)
6.588	7.10933
4-bond
J(2-5)	J(5-8)	J(15-18)	J(16-18)	J(18-22)	J(28-32)
0.8945	0.764	0.133833	-0.0921667	0.249778	-0.2815

## Sheet: CONF3
Orca lab.	Lab	sigma	Av(258K)	Av(298K)	C1(shift(TMS))	C2(shift(TMS))	ExpSh(258K)	ExpSh(298K)	CalSh(258K)	CalSh(298K)			Orca lab.	Lab	sigma	Av(sigma)	C(shift(TMS))	E(shift)	C(shift)
1H	1H	1H	1H	1H	1H	1H	1H	1H	1H	1H			13C	13C	13C	13C	13C	13C	13C
1	2	22.502	22.502	22.502	9.23	9.23	8.19	8.29	8.17774	8.26046			0	1	45.032	45.032	145.266	129.679	128.976
4	5	22.325	22.2385	22.2385	9.4935	9.4935	8.22	8.29	8.40946	8.49663			2	3	39.513	40.0265	150.272	134.903	133.647
7	8	22.152											3	4	42.32	43.433	146.865	129.083	130.468
14	15	26.86	26.86	26.988	4.872	4.744	4.19	4.16	4.34532	4.23966			5	6	46.188	46.188	144.11	128.334	127.897
15	16	27.116	27.116		4.616		4.17		4.12019				6	7	44.546
17	18	30.158	29.9527	29.9527	1.77933	1.77933	1.54	1.465	1.62562	1.58242			8	9	40.54
18	19	29.738											10	11	10.411	10.411	179.887	161.781	161.284
19	20	29.962											12	13	110.263	110.263	80.035	67.472	68.1026
21	22	29.982	30.0813	30.0813	1.65067	1.65067	1.42	1.41	1.51248	1.4671			13	14	98.528	98.528	91.77	79.352	79.0537
22	23	30.147											16	17	155.14	155.14	35.158	27.002	26.2234
23	24	30.115											20	21	154.5
27	28	24.259	24.327	24.327	7.405	7.405	8.12	7.615	6.57284	6.62471			24	25	7.094	6.4315	183.867	166.965	164.998
29	30	26.876	26.8495	26.8495	4.8825	4.8825	4.86	4.84	4.35455	4.36379			28	29	129.181	129.152	61.146	48.85	50.4754
31	32	29.802	29.855	29.855	1.877	1.877	1.61	1.57	1.71151	1.66996			30	31	167.17	167.097	23.2005	15.823	15.0646
32	33	29.959											34	35	-4.832	-5.0675	195.365	173.23	175.729
33	34	29.842											37	38	127.546	127.528	62.77	51.445	51.9909
38	39	27.452	27.5205	27.5205	4.2115	4.2115	3.82	3.81	3.76447	3.76238			41	42	5.769
39	40	27.58											45	46	129.123			MAE:	1.02924
40	41	27.569						MAE(C-H):	0.138604	0.139269			47	48	167.025
44	45	24.395						AE(N-H):	1.54716	0.99029			51	52	-5.303
46	47	26.823											54	55	127.51
48	49	29.767
49	50	30.048
50	51	29.712
55	56	27.411
56	57	27.553
57	58	27.558
orca lab		1	4	7	14	15	17	18	19	21	22	23	27	29	31	32	33	38	39	40	44	46	48	49	50	55	56	57
	Lab.	2	5	8	15	16	18	19	20	22	23	24	28	30	32	33	34	39	40	41	45	47	49	50	51	56	57	58
1	2	0	0.973	0.802	0	0.002	0	0	0	0	0.015	0	-0.331	-0.042	0.006	-0.003	-0.002	0	0	0.001	0.033	-0.078	0.011	-0.001	0.002	0	0	0
4	5	0.973	0	0.762	-0.005	0.009	0.016	0.005	-0.036	0.01	0.019	-0.088	0.047	-0.087	0.012	0.002	0	0	0	0	0.004	-0.056	0	0	0	0	0	0
7	8	0.802	0.762	0	0.009	-0.002	0.011	0.007	-0.032	0.009	0.014	-0.08	0.023	-0.063	0	0	0	0	0	0	-0.323	-0.037	0.005	-0.002	-0.001	0	0	0
14	15	0	-0.005	0.009	0	-9.009	0.061	0.108	-0.245	0.473	-0.334	-0.287	0	0	0	0	0	0	0	0	0	0	0	0	0	0	0	0
15	16	0.002	0.009	-0.002	-9.009	0	-0.402	0.249	-0.262	1.319	-0.039	-0.399	0	0	0	0	0	0	0	0	0	0	0	0	0	0	0	0
17	18	0	0.016	0.011	0.061	-0.402	0	-12.359	-12.608	-0.19	3.175	0.055	0	0	0	0	0	0	0	0	0	0	0	0	0	0	0	0
18	19	0	0.005	0.007	0.108	0.249	-12.359	0	-13.287	-0.191	-0.046	-0.207	0	0	0	0	0	0	0	0	0	0	0	0	0	0	0	0
19	20	0	-0.036	-0.032	-0.245	-0.262	-12.608	-13.287	0	-0.186	-0.076	-0.155	0	0	0	0	0	0	0	0	0	0	0	0	0	0	0	0
21	22	0	0.01	0.009	0.473	1.319	-0.19	-0.191	-0.186	0	-12.532	-13.089	0	0	0	0	0	0	0	0	0	0	0	0	0	0	0	0
22	23	0.015	0.019	0.014	-0.334	-0.039	3.175	-0.046	-0.076	-12.532	0	-12.373	0	0	0	0	0	0	0	0	0	0	0	0	0	0	0	0
23	24	0	-0.088	-0.08	-0.287	-0.399	0.055	-0.207	-0.155	-13.089	-12.373	0	0	0	0	0	0	0	0	0	0	0	0	0	0	0	0	0
27	28	-0.331	0.047	0.023	0	0	0	0	0	0	0	0	0	3.849	-0.432	-0.218	-0.256	-0.031	-0.018	-0.041	0	0.001	0	0	0	0	0	0
29	30	-0.042	-0.087	-0.063	0	0	0	0	0	0	0	0	3.849	0	3.003	13.511	4.827	0.115	0.011	0.109	0	0	0	0	0	0	0	0
31	32	0.006	0.012	0	0	0	0	0	0	0	0	0	-0.432	3.003	0	-13.13	-14.071	0.007	-0.001	0.019	0	0	0	0	0	0	0	0
32	33	-0.003	0.002	0	0	0	0	0	0	0	0	0	-0.218	13.511	-13.13	0	-11.692	-0.022	0.003	-0.023	0	0	0	0	0	0	0	0
33	34	-0.002	0	0	0	0	0	0	0	0	0	0	-0.256	4.827	-14.071	-11.692	0	0.019	0.004	0.075	0	0	0	0	0	0	0	0
38	39	0	0	0	0	0	0	0	0	0	0	0	-0.031	0.115	0.007	-0.022	0.019	0	-10.601	-10.39	0	0	0	0	0	0	0	0
39	40	0	0	0	0	0	0	0	0	0	0	0	-0.018	0.011	-0.001	0.003	0.004	-10.601	0	-10.433	0	0	0	0	0	0	0	0
40	41	0.001	0	0	0	0	0	0	0	0	0	0	-0.041	0.109	0.019	-0.023	0.075	-10.39	-10.433	0	0	0	0	0	0	0	0	0
44	45	0.033	0.004	-0.323	0	0	0	0	0	0	0	0	0	0	0	0	0	0	0	0	0	6.654	-0.404	-0.189	-0.226	-0.02	-0.02	-0.023
46	47	-0.078	-0.056	-0.037	0	0	0	0	0	0	0	0	0.001	0	0	0	0	0	0	0	6.654	0	3.079	13.459	4.81	0.127	0.017	0.114
48	49	0.011	0	0.005	0	0	0	0	0	0	0	0	0	0	0	0	0	0	0	0	-0.404	3.079	0	-13.221	-13.898	0.009	-0.001	0.02
49	50	-0.001	0	-0.002	0	0	0	0	0	0	0	0	0	0	0	0	0	0	0	0	-0.189	13.459	-13.221	0	-11.786	-0.021	0.002	-0.023
50	51	0.002	0	-0.001	0	0	0	0	0	0	0	0	0	0	0	0	0	0	0	0	-0.226	4.81	-13.898	-11.786	0	0.021	0.004	0.078
55	56	0	0	0	0	0	0	0	0	0	0	0	0	0	0	0	0	0	0	0	-0.02	0.127	0.009	-0.021	0.021	0	-10.575	-10.418
56	57	0	0	0	0	0	0	0	0	0	0	0	0	0	0	0	0	0	0	0	-0.02	0.017	-0.001	0.002	0.004	-10.575	0	-10.436
57	58	0	0	0	0	0	0	0	0	0	0	0	0	0	0	0	0	0	0	0	-0.023	0.114	0.02	-0.023	0.078	-10.418	-10.436	0
residual:	0.331
2-bond
J(15-16)	J(18-19)	J(22-23)	J(32-33)	J(39-40)
-9.009	-12.7513	-12.6647	-12.9663	-10.4755
3-bond
J(28-30)	J(30-32)
5.2515	7.11483
4-bond
J(2-5)	J(5-8)	J(15-18)	J(16-18)	J(18-22)	J(28-32)
0.8875	0.762	0.134167	-0.0938333	0.242111	-0.2875

## Sheet: CONF4
Orca lab.	Lab	sigma	Av(258K)	Av(298K)	C1(shift(TMS))	C2(shift(TMS))	ExpSh(258K)	ExpSh(298K)	CalSh(258K)	CalSh(298K)			Orca lab.	Lab	sigma	Av(sigma)	C(shift(TMS))	E(shift)	C(shift)
1H	1H	1H	1H	1H	1H	1H	1H	1H	1H	1H			13C	13C	13C	13C	13C	13C	13C
1	2	22.503	22.503	22.503	9.229	9.229	8.19	8.29	8.18486	8.26906			0	1	44.949	44.949	145.349	129.679	128.957
4	5	22.331	22.247	22.247	9.485	9.485	8.22	8.29	8.41009	8.49867			2	3	39.552	39.9185	150.38	134.903	133.654
7	8	22.163											3	4	42.149	43.266	147.032	129.083	130.528
14	15	26.839	26.839	26.9815	4.893	4.7505	4.19	4.16	4.37005	4.25229			5	6	46.107	46.107	144.191	128.334	127.875
15	16	27.124	27.124		4.608		4.17		4.1193				6	7	44.383
17	18	30.165	29.9517	29.9517	1.78033	1.78033	1.54	1.465	1.63152	1.58835			8	9	40.285
18	19	29.733											10	11	10.46	10.46	179.838	161.781	161.162
19	20	29.957											12	13	110.284	110.284	80.014	67.472	67.9468
21	22	29.98	30.0777	30.0777	1.65433	1.65433	1.42	1.41	1.52067	1.47534			13	14	98.518	98.518	91.78	79.352	78.9339
22	23	30.139											16	17	155.122	155.122	35.176	27.002	26.0771
23	24	30.114											20	21	154.534
27	28	24.468	24.4095	24.4095	7.3225	7.3225	8.12	7.615	6.50752	6.55912			24	25	5.805	5.761	184.537	166.965	165.55
29	30	26.827	26.8785	26.8785	4.8535	4.8535	4.86	4.84	4.3353	4.34467			28	29	129.175	128.256	62.0425	48.85	51.165
31	32	29.78	29.8445	29.8445	1.8875	1.8875	1.61	1.57	1.72581	1.68447			30	31	167.022	166.93	23.368	15.823	15.0508
32	33	30.1											34	35	-5.256	-4.748	195.046	173.23	175.364
33	34	29.727											37	38	127.576	127.668	62.6295	51.445	51.7132
38	39	27.437	27.5777	27.5777	4.15433	4.15433	3.82	3.81	3.72017	3.71759			41	42	5.717
39	40	27.562											45	46	127.336			MAE:	1.01656
40	41	27.573						MAE(C-H):	0.150945	0.151599			47	48	166.838
44	45	24.351						AE(N-H):	1.61248	1.05588			51	52	-4.24
46	47	26.93											54	55	127.761
48	49	29.735
49	50	30.043
50	51	29.682
55	56	27.571
56	57	27.583
57	58	27.74
orca lab		1	4	7	14	15	17	18	19	21	22	23	27	29	31	32	33	38	39	40	44	46	48	49	50	55	56	57
	Lab.	2	5	8	15	16	18	19	20	22	23	24	28	30	32	33	34	39	40	41	45	47	49	50	51	56	57	58
1	2	0	0.966	0.804	0	0.002	0	0	0	0	0.015	0	-0.309	-0.034	0.005	-0.002	-0.001	0	0	0	0.038	-0.083	0.011	-0.001	0.002	0	-0.001	0
4	5	0.966	0	0.769	-0.005	0.011	0.016	0.005	-0.037	0.01	0.02	-0.088	0.038	-0.078	0.011	-0.001	0.002	0	0	0	0.007	-0.06	0	0	0	0	0	0
7	8	0.804	0.769	0	0.008	-0.001	0.011	0.007	-0.033	0.009	0.014	-0.08	0.005	-0.055	0	0	0	0	0	0	-0.308	-0.047	0.006	-0.002	-0.001	0	-0.001	0
14	15	0	-0.005	0.008	0	-8.998	0.056	0.097	-0.241	0.466	-0.337	-0.298	0	0	0	0	0	0	0	0	0	0	0	0	0	0	0	0
15	16	0.002	0.011	-0.001	-8.998	0	-0.408	0.241	-0.255	1.321	-0.044	-0.403	0	0	0	0	0	0	0	0	0	0	0	0	0	0	0	0
17	18	0	0.016	0.011	0.056	-0.408	0	-12.335	-12.593	-0.185	3.193	0.056	0	0	0	0	0	0	0	0	0	0	0	0	0	0	0	0
18	19	0	0.005	0.007	0.097	0.241	-12.335	0	-13.289	-0.187	-0.043	-0.207	0	0	0	0	0	0	0	0	0	0	0	0	0	0	0	0
19	20	0	-0.037	-0.033	-0.241	-0.255	-12.593	-13.289	0	-0.187	-0.069	-0.153	0	0	0	0	0	0	0	0	0	0	0	0	0	0	0	0
21	22	0	0.01	0.009	0.466	1.321	-0.185	-0.187	-0.187	0	-12.552	-13.089	0	0	0	0	0	0	0	0	0	0	0	0	0	0	0	0
22	23	0.015	0.02	0.014	-0.337	-0.044	3.193	-0.043	-0.069	-12.552	0	-12.418	0	0	0	0	0	0	0	0	0	0	0	0	0	0	0	0
23	24	0	-0.088	-0.08	-0.298	-0.403	0.056	-0.207	-0.153	-13.089	-12.418	0	0	0	0	0	0	0	0	0	0	0	0	0	0	0	0	0
27	28	-0.309	0.038	0.005	0	0	0	0	0	0	0	0	0	6.701	-0.418	-0.207	-0.236	-0.02	-0.02	-0.022	0	0.001	0	0	0	0	0	0
29	30	-0.034	-0.078	-0.055	0	0	0	0	0	0	0	0	6.701	0	3.103	13.471	4.818	0.133	0.016	0.122	0	0	0	0	0	0	0	0
31	32	0.005	0.011	0	0	0	0	0	0	0	0	0	-0.418	3.103	0	-13.218	-13.959	0.01	-0.001	0.02	0	0	0	0	0	0	0	0
32	33	-0.002	-0.001	0	0	0	0	0	0	0	0	0	-0.207	13.471	-13.218	0	-11.8	-0.022	0.001	-0.024	0	0	0	0	0	0	0	0
33	34	-0.001	0.002	0	0	0	0	0	0	0	0	0	-0.236	4.818	-13.959	-11.8	0	0.025	0.004	0.081	0	0	0	0	0	0	0	0
38	39	0	0	0	0	0	0	0	0	0	0	0	-0.02	0.133	0.01	-0.022	0.025	0	-10.597	-10.367	0	0	0	0	0	0	0	0
39	40	0	0	0	0	0	0	0	0	0	0	0	-0.02	0.016	-0.001	0.001	0.004	-10.597	0	-10.481	0	0	0	0	0	0	0	0
40	41	0	0	0	0	0	0	0	0	0	0	0	-0.022	0.122	0.02	-0.024	0.081	-10.367	-10.481	0	0	0	0	0	0	0	0	0
44	45	0.038	0.007	-0.308	0	0	0	0	0	0	0	0	0	0	0	0	0	0	0	0	0	5.952	-0.402	-0.2	-0.231	0.002	-0.021	-0.005
46	47	-0.083	-0.06	-0.047	0	0	0	0	0	0	0	0	0.001	0	0	0	0	0	0	0	5.952	0	2.948	13.626	5.047	0.117	0.086	0.166
48	49	0.011	0	0.006	0	0	0	0	0	0	0	0	0	0	0	0	0	0	0	0	-0.402	2.948	0	-13.169	-13.973	-0.028	-0.021	-0.001
49	50	-0.001	0	-0.002	0	0	0	0	0	0	0	0	0	0	0	0	0	0	0	0	-0.2	13.626	-13.169	0	-11.723	-0.01	-0.008	0
50	51	0.002	0	-0.001	0	0	0	0	0	0	0	0	0	0	0	0	0	0	0	0	-0.231	5.047	-13.973	-11.723	0	0.03	0.094	0.008
55	56	0	0	0	0	0	0	0	0	0	0	0	0	0	0	0	0	0	0	0	0.002	0.117	-0.028	-0.01	0.03	0	-10.463	-10.579
56	57	-0.001	0	-0.001	0	0	0	0	0	0	0	0	0	0	0	0	0	0	0	0	-0.021	0.086	-0.021	-0.008	0.094	-10.463	0	-10.322
57	58	0	0	0	0	0	0	0	0	0	0	0	0	0	0	0	0	0	0	0	-0.005	0.166	-0.001	0	0.008	-10.579	-10.322	0
residual:	0.309
2-bond
J(15-16)	J(18-19)	J(22-23)	J(32-33)	J(39-40)
-8.998	-12.739	-12.6863	-12.9737	-10.4682
3-bond
J(28-30)	J(30-32)
6.3265	7.16883
4-bond
J(2-5)	J(5-8)	J(15-18)	J(16-18)	J(18-22)	J(28-32)
0.885	0.769	0.131	-0.0985	0.246444	-0.282333

## Sheet: CONF5
Orca lab.	Lab	sigma	Av(258K)	Av(298K)	C1(shift(TMS))	C2(shift(TMS))	ExpSh(258K)	ExpSh(298K)	CalSh(258K)	CalSh(298K)			Orca lab.	Lab	sigma	Av(sigma)	C(shift(TMS))	E(shift)	C(shift)
1H	1H	1H	1H	1H	1H	1H	1H	1H	1H	1H			13C	13C	13C	13C	13C	13C	13C
1	2	22.408	22.408	22.408	9.324	9.324	8.19	8.29	8.22165	8.30195			0	1	45.095	45.095	145.203	129.679	129.087
4	5	22.322	22.2235	22.2235	9.5085	9.5085	8.22	8.29	8.38288	8.46631			2	3	39.411	40.077	150.221	134.903	133.78
7	8	22.125											3	4	42.475	43.7665	146.531	129.083	130.33
14	15	26.852	26.852	26.9825	4.88	4.7495	4.19	4.16	4.33804	4.22699			5	6	46.17	46.17	144.128	128.334	128.082
15	16	27.113	27.113		4.619		4.17		4.10995				6	7	45.058
17	18	30.154	29.95	29.95	1.782	1.782	1.54	1.465	1.63069	1.58354			8	9	40.743
18	19	29.729											10	11	10.514	10.514	179.784	161.781	161.427
19	20	29.967											12	13	110.266	110.266	80.032	67.472	68.1392
21	22	29.958	30.061	30.061	1.671	1.671	1.42	1.41	1.53369	1.48466			13	14	98.497	98.497	91.801	79.352	79.1456
22	23	30.131											16	17	155.043	155.043	35.255	27.002	26.2638
23	24	30.094											20	21	154.475
27	28	24.287	24.2365	24.2365	7.4955	7.4955	8.12	7.615	6.62372	6.67313			24	25	7.034	7.31	182.988	166.965	164.424
29	30	26.842	26.8315	26.8315	4.9005	4.9005	4.86	4.84	4.35595	4.3615			28	29	129.231	129.198	61.0995	48.85	50.4336
31	32	29.975	29.857	29.857	1.875	1.875	1.61	1.57	1.71197	1.66638			30	31	167.237	167.178	23.1195	15.823	14.9147
32	33	29.859											34	35	-4.913	-4.9385	195.237	173.23	175.878
33	34	29.789											37	38	127.484	127.474	62.8245	51.445	52.0468
38	39	27.581	27.5258	27.5258	4.20617	4.20617	3.82	3.81	3.74917	3.74299			41	42	7.586
39	40	27.568											45	46	129.166			MAE:	1.03559
40	41	27.45						MAE(C-H):	0.14265	0.136293			47	48	167.12
44	45	24.186						AE(N-H):	1.49628	0.941874			51	52	-4.964
46	47	26.821											54	55	127.463
48	49	29.812
49	50	29.767
50	51	29.94
55	56	27.568
56	57	27.551
57	58	27.437
orca lab		1	4	7	14	15	17	18	19	21	22	23	27	29	31	32	33	38	39	40	44	46	48	49	50	55	56	57
	Lab.	2	5	8	15	16	18	19	20	22	23	24	28	30	32	33	34	39	40	41	45	47	49	50	51	56	57	58
1	2	0	0.985	0.82	0	0.004	0	0	0	0	0.015	0	-0.337	-0.036	-0.003	-0.002	0.005	0	0.001	0	0.045	-0.084	0	0.013	0.001	0	0	0
4	5	0.985	0	0.709	-0.006	0.011	0.016	0.005	-0.038	0.01	0.019	-0.086	0.047	-0.08	0.001	0	0.012	0	0	0	0.022	-0.06	0	0	0	0	0	0
7	8	0.82	0.709	0	0	0.004	0.011	0.007	-0.033	0.01	0.014	-0.078	0.021	-0.051	0	0	0	0	0	0	-0.364	-0.046	-0.002	0.005	-0.003	0	0.001	0
14	15	0	-0.006	0	0	-8.992	0.059	0.112	-0.246	0.477	-0.333	-0.289	0	0	0	0	0	0	0	0	0	0	0	0	0	0	0	0
15	16	0.004	0.011	0.004	-8.992	0	-0.406	0.247	-0.263	1.31	-0.04	-0.399	0	0	0	0	0	0	0	0	0	0	0	0	0	0	0	0
17	18	0	0.016	0.011	0.059	-0.406	0	-12.389	-12.575	-0.182	3.19	0.056	0	0	0	0	0	0	0	0	0	0	0	0	0	0	0	0
18	19	0	0.005	0.007	0.112	0.247	-12.389	0	-13.252	-0.187	-0.047	-0.205	0	0	0	0	0	0	0	0	0	0	0	0	0	0	0	0
19	20	0	-0.038	-0.033	-0.246	-0.263	-12.575	-13.252	0	-0.185	-0.066	-0.153	0	0	0	0	0	0	0	0	0	0	0	0	0	0	0	0
21	22	0	0.01	0.01	0.477	1.31	-0.182	-0.187	-0.185	0	-12.496	-13.092	0	0	0	0	0	0	0	0	0	0	0	0	0	0	0	0
22	23	0.015	0.019	0.014	-0.333	-0.04	3.19	-0.047	-0.066	-12.496	0	-12.398	0	0	0	0	0	0	0	0	0	0	0	0	0	0	0	0
23	24	0	-0.086	-0.078	-0.289	-0.399	0.056	-0.205	-0.153	-13.092	-12.398	0	0	0	0	0	0	0	0	0	0.001	0	0	0	0	0	0	0
27	28	-0.337	0.047	0.021	0	0	0	0	0	0	0	0	0	4.435	-0.21	-0.247	-0.424	-0.019	-0.036	-0.029	0	0.001	0	0	0	0	0	0
29	30	-0.036	-0.08	-0.051	0	0	0	0	0	0	0	0	4.435	0	13.528	4.824	3.045	0.012	0.119	0.125	0	0	0	0	0	0	0	0
31	32	-0.003	0.001	0	0	0	0	0	0	0	0	0	-0.21	13.528	0	-11.688	-13.146	0.002	-0.024	-0.022	0	0	0	0	0	0	0	0
32	33	-0.002	0	0	0	0	0	0	0	0	0	0	-0.247	4.824	-11.688	0	-14.051	0.003	0.079	0.022	0	0	0	0	0	0	0	0
33	34	0.005	0.012	0	0	0	0	0	0	0	0	0	-0.424	3.045	-13.146	-14.051	0	-0.001	0.019	0.009	0	0	0	0	0	0	0	0
38	39	0	0	0	0	0	0	0	0	0	0	0	-0.019	0.012	0.002	0.003	-0.001	0	-10.425	-10.57	0	0	0	0	0	0	0	0
39	40	0.001	0	0	0	0	0	0	0	0	0	0	-0.036	0.119	-0.024	0.079	0.019	-10.425	0	-10.382	0	0	0	0	0	0	0	0
40	41	0	0	0	0	0	0	0	0	0	0	0	-0.029	0.125	-0.022	0.022	0.009	-10.57	-10.382	0	0	0	0	0	0	0	0	0
44	45	0.045	0.022	-0.364	0	0	0	0	0	0	0	0.001	0	0	0	0	0	0	0	0	0	4.392	-0.256	-0.435	-0.222	-0.019	-0.037	-0.029
46	47	-0.084	-0.06	-0.046	0	0	0	0	0	0	0	0	0.001	0	0	0	0	0	0	0	4.392	0	4.777	3.027	13.469	0.013	0.111	0.119
48	49	0	0	-0.002	0	0	0	0	0	0	0	0	0	0	0	0	0	0	0	0	-0.256	4.777	0	-14.053	-11.667	0.004	0.077	0.021
49	50	0.013	0	0.005	0	0	0	0	0	0	0	0	0	0	0	0	0	0	0	0	-0.435	3.027	-14.053	0	-13.128	-0.001	0.02	0.009
50	51	0.001	0	-0.003	0	0	0	0	0	0	0	0	0	0	0	0	0	0	0	0	-0.222	13.469	-11.667	-13.128	0	0.003	-0.024	-0.022
55	56	0	0	0	0	0	0	0	0	0	0	0	0	0	0	0	0	0	0	0	-0.019	0.013	0.004	-0.001	0.003	0	-10.375	-10.505
56	57	0	0	0.001	0	0	0	0	0	0	0	0	0	0	0	0	0	0	0	0	-0.037	0.111	0.077	0.02	-0.024	-10.375	0	-10.416
57	58	0	0	0	0	0	0	0	0	0	0	0	0	0	0	0	0	0	0	0	-0.029	0.119	0.021	0.009	-0.022	-10.505	-10.416	0
residual:	0.364
2-bond
J(15-16)	J(18-19)	J(22-23)	J(32-33)	J(39-40)
-8.992	-12.7387	-12.662	-12.9555	-10.4455
3-bond
J(28-30)	J(30-32)
4.4135	7.11167
4-bond
J(2-5)	J(5-8)	J(15-18)	J(16-18)	J(18-22)	J(28-32)
0.9025	0.709	0.132667	-0.0945	0.246778	-0.299

## Sheet: CONF6
Orca lab.	Lab	sigma	Av(258K)	Av(298K)	C1(shift(TMS))	C2(shift(TMS))	ExpSh(258K)	ExpSh(298K)	CalSh(258K)	CalSh(298K)			Orca lab.	Lab	sigma	Av(sigma)	C(shift(TMS))	E(shift)	C(shift)
1H	1H	1H	1H	1H	1H	1H	1H	1H	1H	1H			13C	13C	13C	13C	13C	13C	13C
1	2	22.502	22.502	22.502	9.23	9.23	8.19	8.29	8.18174	8.26296			0	1	45.05	45.05	145.248	129.679	129.023
4	5	22.584	22.2425	22.2425	9.4895	9.4895	8.22	8.29	8.41005	8.4957			2	3	40.427	40.0345	150.263	134.903	133.708
7	8	21.901											3	4	46.183	43.364	146.934	129.083	130.598
14	15	26.858	26.858	27.009	4.874	4.723	4.19	4.16	4.34933	4.22063			5	6	46.136	46.136	144.162	128.334	128.009
15	16	27.16	27.16		4.572		4.17		4.08363				6	7	40.545
17	18	30.193	29.963	29.963	1.769	1.769	1.54	1.465	1.61755	1.57119			8	9	39.642
18	19	29.717											10	11	10.986	10.986	179.312	161.781	160.839
19	20	29.979											12	13	110.088	110.088	80.21	67.472	68.2778
21	22	30.115	30.06	30.06	1.672	1.672	1.42	1.41	1.53221	1.48419			13	14	98.636	98.636	91.662	79.352	78.974
22	23	29.943											16	17	155.227	155.227	35.071	27.002	26.118
23	24	30.122											20	21	154.589
27	28	24.475	24.37	24.37	7.362	7.362	8.12	7.615	6.53827	6.58755			24	25	5.611	6.4685	183.829	166.965	165.058
29	30	26.827	26.846	26.846	4.886	4.886	4.86	4.84	4.35989	4.36682			28	29	129.169	129.2	61.0985	48.85	50.4277
31	32	29.736	29.8613	29.8613	1.87067	1.87067	1.61	1.57	1.707	1.66237			30	31	166.998	167.072	23.226	15.823	15.0548
32	33	29.769											34	35	-5.256	-5.051	195.349	173.23	175.818
33	34	30.069											37	38	127.49	127.522	62.7765	51.445	51.9949
38	39	27.569	27.5197	27.5197	4.21233	4.21233	3.82	3.81	3.7672	3.76261			41	42	7.326
39	40	27.405											45	46	129.23			MAE:	1.08391
40	41	27.554						MAE(C-H):	0.142632	0.135835			47	48	167.146
44	45	24.265						AE(N-H):	1.58173	1.02745			51	52	-4.846
46	47	26.865											54	55	127.553
48	49	29.795
49	50	29.962
50	51	29.837
55	56	27.564
56	57	27.452
57	58	27.574
orca lab		1	4	7	14	15	17	18	19	21	22	23	27	29	31	32	33	38	39	40	44	46	48	49	50	55	56	57
	Lab.	2	5	8	15	16	18	19	20	22	23	24	28	30	32	33	34	39	40	41	45	47	49	50	51	56	57	58
1	2	0	0.76	1.011	0	0.001	0	0	0	0	0	0.015	0.033	-0.08	0.003	0.011	-0.001	0	0	0	-0.336	-0.036	0.006	-0.003	-0.002	0.001	0	0
4	5	0.76	0	0.77	-0.005	0.012	0.015	0.003	-0.034	-0.087	0.01	0.019	-0.322	-0.034	-0.001	0.005	-0.002	0	0	0	0.022	-0.061	0	0	0	0	0	0
7	8	1.011	0.77	0	0.004	0	0.011	0.008	-0.033	-0.086	0.01	0.014	0.004	-0.057	0	0	0	0	0	0	0.05	-0.09	0.013	0.002	0	0	0	0
14	15	0	-0.005	0.004	0	-8.952	0.057	0.081	-0.239	-0.293	0.482	-0.311	0	0	0	0	0	0	0	0	0	0	0	0	0	0	0	0
15	16	0.001	0.012	0	-8.952	0	-0.382	0.249	-0.261	-0.397	1.355	-0.039	0	0	0	0	0	0	0	0	0	0	0	0	0	0	0	0
17	18	0	0.015	0.011	0.057	-0.382	0	-12.434	-12.588	0.075	-0.171	3.199	0	0	0	0	0	0	0	0	0	0	0	0	0	0	0	0
18	19	0	0.003	0.008	0.081	0.249	-12.434	0	-13.295	-0.204	-0.17	-0.033	0	0	0	0	0	0	0	0	0	0	0	0	0	0	0	0
19	20	0	-0.034	-0.033	-0.239	-0.261	-12.588	-13.295	0	-0.135	-0.184	-0.068	0	0	0	0	0	0	0	0	0	0	0	0	0	0	0	0
21	22	0	-0.087	-0.086	-0.293	-0.397	0.075	-0.204	-0.135	0	-13.101	-12.353	0	0	0	0	0	0	0	0	0	0	0	0	0	0	0	0
22	23	0	0.01	0.01	0.482	1.355	-0.171	-0.17	-0.184	-13.101	0	-12.587	0	0	0	0	0	0	0	0	0	0	0	0	0	0	0	0
23	24	0.015	0.019	0.014	-0.311	-0.039	3.199	-0.033	-0.068	-12.353	-12.587	0	0	0	0	0	0	0	0	0	0	0	0	0	0	0	0	0
27	28	0.033	-0.322	0.004	0	0	0	0	0	0	0	0	0	6.808	-0.224	-0.4	-0.188	-0.022	-0.02	-0.02	0	0	0	0	0	0	0	0
29	30	-0.08	-0.034	-0.057	0	0	0	0	0	0	0	0	6.808	0	4.806	3.094	13.461	0.118	0.129	0.016	0.001	0	0	0	0	0	0	0
31	32	0.003	-0.001	0	0	0	0	0	0	0	0	0	-0.224	4.806	0	-13.903	-11.747	0.08	0.023	0.003	0	0	0	0	0	0	0	0
32	33	0.011	0.005	0	0	0	0	0	0	0	0	0	-0.4	3.094	-13.903	0	-13.232	0.02	0.009	-0.001	0	0	0	0	0	0	0	0
33	34	-0.001	-0.002	0	0	0	0	0	0	0	0	0	-0.188	13.461	-11.747	-13.232	0	-0.024	-0.022	0.002	0	0	0	0	0	0	0	0
38	39	0	0	0	0	0	0	0	0	0	0	0	-0.022	0.118	0.08	0.02	-0.024	0	-10.419	-10.438	0	0	0	0	0	0	0	0
39	40	0	0	0	0	0	0	0	0	0	0	0	-0.02	0.129	0.023	0.009	-0.022	-10.419	0	-10.54	0	0	0	0	0	0	0	0
40	41	0	0	0	0	0	0	0	0	0	0	0	-0.02	0.016	0.003	-0.001	0.002	-10.438	-10.54	0	0	0	0	0	0	0	0	0
44	45	-0.336	0.022	0.05	0	0	0	0	0	0	0	0	0	0.001	0	0	0	0	0	0	0	3.974	-0.433	-0.225	-0.252	-0.04	-0.03	-0.018
46	47	-0.036	-0.061	-0.09	0	0	0	0	0	0	0	0	0	0	0	0	0	0	0	0	3.974	0	2.997	13.499	4.849	0.11	0.117	0.012
48	49	0.006	0	0.013	0	0	0	0	0	0	0	0	0	0	0	0	0	0	0	0	-0.433	2.997	0	-13.126	-14.074	0.019	0.007	-0.001
49	50	-0.003	0	0.002	0	0	0	0	0	0	0	0	0	0	0	0	0	0	0	0	-0.225	13.499	-13.126	0	-11.708	-0.023	-0.022	0.003
50	51	-0.002	0	0	0	0	0	0	0	0	0	0	0	0	0	0	0	0	0	0	-0.252	4.849	-14.074	-11.708	0	0.075	0.019	0.004
55	56	0.001	0	0	0	0	0	0	0	0	0	0	0	0	0	0	0	0	0	0	-0.04	0.11	0.019	-0.023	0.075	0	-10.37	-10.421
56	57	0	0	0	0	0	0	0	0	0	0	0	0	0	0	0	0	0	0	0	-0.03	0.117	0.007	-0.022	0.019	-10.37	0	-10.596
57	58	0	0	0	0	0	0	0	0	0	0	0	0	0	0	0	0	0	0	0	-0.018	0.012	-0.001	0.003	0.004	-10.421	-10.596	0
residual:	0.336
2-bond
J(15-16)	J(18-19)	J(22-23)	J(32-33)	J(39-40)
-8.952	-12.7723	-12.6803	-12.965	-10.464
3-bond
J(28-30)	J(30-32)
5.391	7.11767
4-bond
J(2-5)	J(5-8)	J(15-18)	J(16-18)	J(18-22)	J(28-32)
0.8855	0.77	0.136333	-0.086	0.256556	-0.287

## Sheet: CONF7
Orca lab.	Lab	sigma	Av(258K)	Av(298K)	C1(shift(TMS))	C2(shift(TMS))	ExpSh(258K)	ExpSh(298K)	CalSh(258K)	CalSh(298K)			Orca lab.	Lab	sigma	Av(sigma)	C(shift(TMS))	E(shift)	C(shift)
1H	1H	1H	1H	1H	1H	1H	1H	1H	1H	1H			13C	13C	13C	13C	13C	13C	13C
1	2	22.49	22.49	22.49	9.242	9.242	8.19	8.29	8.18153	8.26795			0	1	45.007	45.007	145.291	129.679	129.074
4	5	22.123	22.218	22.218	9.514	9.514	8.22	8.29	8.42037	8.51145			2	3	40.438	40.1875	150.111	134.903	133.59
7	8	22.313											3	4	44.705	43.5595	146.738	129.083	130.43
14	15	27.104	27.104	26.973	4.628	4.759	4.19	4.16	4.12998	4.25477			5	6	46.087	46.087	144.211	128.334	128.062
15	16	26.842	26.842		4.89		4.17		4.36004				6	7	42.414
17	18	30.117	30.053	30.053	1.679	1.679	1.54	1.465	1.54046	1.49755			8	9	39.937
18	19	29.948											10	11	10.47	10.47	179.828	161.781	161.439
19	20	30.094											12	13	110.276	110.276	80.022	67.472	67.9104
21	22	29.723	29.9447	29.9447	1.78733	1.78733	1.42	1.41	1.63559	1.59453			13	14	98.439	98.439	91.859	79.352	79.0028
22	23	30.163											16	17	154.47	154.47	35.828	27.002	26.4962
23	24	29.948											20	21	155.072
27	28	24.242	24.294	24.294	7.438	7.438	8.12	7.615	6.59744	6.65301			24	25	7.312	6.7365	183.561	166.965	164.937
29	30	26.846	26.891	26.891	4.841	4.841	4.86	4.84	4.31701	4.32818			28	29	129.195	128.344	61.954	48.85	50.9788
31	32	29.775	29.8432	29.8432	1.88883	1.88883	1.61	1.57	1.72472	1.6854			30	31	167.143	166.972	23.3255	15.823	14.7801
32	33	29.94											34	35	-4.895	-4.59	194.888	173.23	175.551
33	34	29.827											37	38	127.488	127.633	62.6645	51.445	51.6446
38	39	27.433	27.587	27.587	4.145	4.145	3.82	3.81	3.70586	3.70512			41	42	6.161
39	40	27.557											45	46	127.493			MAE:	0.991814
40	41	27.55						MAE(C-H):	0.160756	0.160932			47	48	166.802
44	45	24.346						AE(N-H):	1.52256	0.961989			51	52	-4.285
46	47	26.936											54	55	127.779
48	49	30.047
49	50	29.718
50	51	29.752
55	56	27.773
56	57	27.609
57	58	27.6
orca lab		1	4	7	14	15	17	18	19	21	22	23	27	29	31	32	33	38	39	40	44	46	48	49	50	55	56	57
	Lab.	2	5	8	15	16	18	19	20	22	23	24	28	30	32	33	34	39	40	41	45	47	49	50	51	56	57	58
1	2	0	0.821	0.972	0.002	0	0.015	0	0	0	0	0	0.048	-0.09	0.012	0.002	0	0	0	0	-0.315	-0.041	-0.002	-0.001	0.006	0	0	-0.001
4	5	0.821	0	0.733	-0.002	0.009	0.014	0.009	-0.081	0.007	0.011	-0.032	-0.36	-0.045	0.005	-0.003	-0.002	0	0	0.001	0.009	-0.06	0	0	0	0	0	0
7	8	0.972	0.733	0	0.009	-0.004	0.019	0.01	-0.089	0.005	0.016	-0.035	0.02	-0.059	0	0	0	0	0	0	0.04	-0.084	-0.001	0.002	0.011	0	0	-0.001
14	15	0.002	-0.002	0.009	0	-9.115	-0.043	1.315	-0.399	0.252	-0.403	-0.256	0	0	0	0	0	0	0	0	0	0	0	0	0	0	0	0
15	16	0	0.009	-0.004	-9.115	0	-0.336	0.466	-0.292	0.111	0.061	-0.243	0	0	0	0	0	0	0	0	0	0	0	0	0	0	0	0
17	18	0.015	0.014	0.019	-0.043	-0.336	0	-12.534	-12.375	-0.066	3.177	-0.091	0	0	0	0	0	0	0	0	0	0	0	0	0	0	0	0
18	19	0	0.009	0.01	1.315	0.466	-12.534	0	-13.078	-0.201	-0.18	-0.204	0	0	0	0	0	0	0	0	0	0	0	0	0	0	0	0
19	20	0	-0.081	-0.089	-0.399	-0.292	-12.375	-13.078	0	-0.224	0.046	-0.173	0.001	0	0	0	0	0	0	0	0	0	0	0	0	0	0	0
21	22	0	0.007	0.005	0.252	0.111	-0.066	-0.201	-0.224	0	-12.334	-13.292	0	0	0	0	0	0	0	0	0	0	0	0	0	0	0	0
22	23	0	0.011	0.016	-0.403	0.061	3.177	-0.18	0.046	-12.334	0	-12.62	0	0	0	0	0	0	0	0	0	0	0	0	0	0	0	0
23	24	0	-0.032	-0.035	-0.256	-0.243	-0.091	-0.204	-0.173	-13.292	-12.62	0	0	0	0	0	0	0	0	0	0	0	0	0	0	0	0	0
27	28	0.048	-0.36	0.02	0	0	0	0	0.001	0	0	0	0	3.963	-0.434	-0.217	-0.26	-0.031	-0.018	-0.04	0	0	0	0	0	0	0	0
29	30	-0.09	-0.045	-0.059	0	0	0	0	0	0	0	0	3.963	0	3.003	13.48	4.809	0.118	0.011	0.114	0	0	0	0	0	0	0	0
31	32	0.012	0.005	0	0	0	0	0	0	0	0	0	-0.434	3.003	0	-13.136	-14.076	0.008	-0.001	0.02	0	0	0	0	0	0	0	0
32	33	0.002	-0.003	0	0	0	0	0	0	0	0	0	-0.217	13.48	-13.136	0	-11.644	-0.022	0.003	-0.024	0	0	0	0	0	0	0	0
33	34	0	-0.002	0	0	0	0	0	0	0	0	0	-0.26	4.809	-14.076	-11.644	0	0.021	0.003	0.078	0	0	0	0	0	0	0	0
38	39	0	0	0	0	0	0	0	0	0	0	0	-0.031	0.118	0.008	-0.022	0.021	0	-10.553	-10.424	0	0	0	0	0	0	0	0
39	40	0	0	0	0	0	0	0	0	0	0	0	-0.018	0.011	-0.001	0.003	0.003	-10.553	0	-10.468	0	0	0	0	0	0	0	0
40	41	0	0.001	0	0	0	0	0	0	0	0	0	-0.04	0.114	0.02	-0.024	0.078	-10.424	-10.468	0	0	0	0	0	0	0	0	0
44	45	-0.315	0.009	0.04	0	0	0	0	0	0	0	0	0	0	0	0	0	0	0	0	0	6.184	-0.203	-0.241	-0.405	-0.004	0.002	-0.02
46	47	-0.041	-0.06	-0.084	0	0	0	0	0	0	0	0	0	0	0	0	0	0	0	0	6.184	0	13.649	5.015	2.987	0.158	0.133	0.095
48	49	-0.002	0	-0.001	0	0	0	0	0	0	0	0	0	0	0	0	0	0	0	0	-0.203	13.649	0	-11.735	-13.171	-0.001	-0.011	-0.007
49	50	-0.001	0	0.002	0	0	0	0	0	0	0	0	0	0	0	0	0	0	0	0	-0.241	5.015	-11.735	0	-13.938	0.009	0.026	0.09
50	51	0.006	0	0.011	0	0	0	0	0	0	0	0	0	0	0	0	0	0	0	0	-0.405	2.987	-13.171	-13.938	0	-0.001	-0.027	-0.021
55	56	0	0	0	0	0	0	0	0	0	0	0	0	0	0	0	0	0	0	0	-0.004	0.158	-0.001	0.009	-0.001	0	-10.595	-10.324
56	57	0	0	0	0	0	0	0	0	0	0	0	0	0	0	0	0	0	0	0	0.002	0.133	-0.011	0.026	-0.027	-10.595	0	-10.393
57	58	-0.001	0	-0.001	0	0	0	0	0	0	0	0	0	0	0	0	0	0	0	0	-0.02	0.095	-0.007	0.09	-0.021	-10.324	-10.393	0
residual:	0.36
2-bond
J(15-16)	J(18-19)	J(22-23)	J(32-33)	J(39-40)
-9.115	-12.6623	-12.7487	-12.95	-10.4595
3-bond
J(28-30)	J(30-32)
5.0735	7.15717
4-bond
J(2-5)	J(5-8)	J(15-18)	J(16-18)	J(18-22)	J(28-32)
0.8965	0.733	0.133667	-0.0948333	0.231556	-0.293333

## Sheet: CONF8
Orca lab.	Lab	sigma	Av(258K)	Av(298K)	C1(shift(TMS))	C2(shift(TMS))	ExpSh(258K)	ExpSh(298K)	CalSh(258K)	CalSh(298K)			Orca lab.	Lab	sigma	Av(sigma)	C(shift(TMS))	E(shift)	C(shift)
1H	1H	1H	1H	1H	1H	1H	1H	1H	1H	1H			13C	13C	13C	13C	13C	13C	13C
1	2	22.498	22.498	22.498	9.234	9.234	8.19	8.29	8.17601	8.25979			0	1	45.215	45.215	145.083	129.679	128.853
4	5	22.141	22.218	22.218	9.514	9.514	8.22	8.29	8.42193	8.51045			2	3	40.666	40.1275	150.171	134.903	133.615
7	8	22.295											3	4	44.533	43.3965	146.901	129.083	130.555
14	15	26.853	26.853	26.9735	4.879	4.7585	4.19	4.16	4.35101	4.25332			5	6	46.097	46.097	144.201	128.334	128.028
15	16	27.094	27.094		4.638		4.17		4.13934				6	7	42.26
17	18	29.955	29.952	29.952	1.78	1.78	1.54	1.465	1.62916	1.58697			8	9	39.589
18	19	30.16											10	11	10.524	10.524	179.774	161.781	161.321
19	20	29.741											12	13	110.249	110.249	80.049	67.472	67.988
21	22	29.964	30.0703	30.0703	1.66167	1.66167	1.42	1.41	1.52523	1.48104			13	14	98.426	98.426	91.872	79.352	79.0531
22	23	30.145											16	17	154.904	154.904	35.394	27.002	26.1953
23	24	30.102											20	21	154.394
27	28	24.379	24.285	24.285	7.447	7.447	8.12	7.615	6.60648	6.66007			24	25	5.936	6.5455	183.752	166.965	165.044
29	30	26.825	26.878	26.878	4.854	4.854	4.86	4.84	4.32905	4.33881			28	29	129.108	128.358	61.94	48.85	51.0397
31	32	29.765	29.8372	29.8372	1.89483	1.89483	1.61	1.57	1.73002	1.68977			30	31	167.048	166.965	23.333	15.823	14.9075
32	33	30.048											34	35	-5.318	-4.7135	195.012	173.23	175.581
33	34	29.708											37	38	127.529	127.594	62.7035	51.445	51.7543
38	39	27.569	27.5832	27.5832	4.14883	4.14883	3.82	3.81	3.7097	3.70755			41	42	7.155
39	40	27.404											45	46	127.608			MAE:	1.05087
40	41	27.548						MAE(C-H):	0.151471	0.157549			47	48	166.882
44	45	24.191						AE(N-H):	1.51352	0.954932			51	52	-4.109
46	47	26.931											54	55	127.66
48	49	29.816
49	50	29.743
50	51	29.943
55	56	27.647
56	57	27.589
57	58	27.742
orca lab		1	4	7	14	15	17	18	19	21	22	23	27	29	31	32	33	38	39	40	44	46	48	49	50	55	56	57
	Lab.	2	5	8	15	16	18	19	20	22	23	24	28	30	32	33	34	39	40	41	45	47	49	50	51	56	57	58
1	2	0	0.789	0.974	0	0.003	0	0	0	0	0.015	0	0.034	-0.08	0.011	-0.001	0.002	0	0	0	-0.338	-0.039	-0.002	0.006	-0.003	0	0	0
4	5	0.789	0	0.763	0.008	-0.001	-0.034	0.011	0.008	0.009	0.014	-0.078	-0.321	-0.038	0.005	-0.002	-0.001	0	0	0	0.023	-0.062	0	0	0	0	0	0
7	8	0.974	0.763	0	-0.004	0.009	-0.038	0.016	0.005	0.01	0.019	-0.086	0.006	-0.057	0	0	0	0	0	0	0.048	-0.086	0	0.012	0.002	0	0	0
14	15	0	0.008	-0.004	0	-9.02	-0.248	0.065	0.151	0.465	-0.337	-0.304	0	0	0	0	0	0	0	0	0	0	0	0	0	0	0	0
15	16	0.003	-0.001	0.009	-9.02	0	-0.257	-0.401	0.268	1.272	-0.036	-0.398	0	0	0	0	0	0	0	0	0	0	0	0	0	0	0	0
17	18	0	-0.034	-0.038	-0.248	-0.257	0	-12.526	-13.233	-0.189	-0.062	-0.153	0	0	0	0	0	0	0	0	0	0	0	0	0	0	0	0
18	19	0	0.011	0.016	0.065	-0.401	-12.526	0	-12.353	-0.181	3.186	0.048	0	0	0	0	0	0	0	0	0	0	0	0	0	0	0	0
19	20	0	0.008	0.005	0.151	0.268	-13.233	-12.353	0	-0.184	-0.051	-0.208	0	0	0	0	0	0	0	0	0	0	0	0	0	0	0	0
21	22	0	0.009	0.01	0.465	1.272	-0.189	-0.181	-0.184	0	-12.517	-13.079	0	0	0	0	0	0	0	0	0	0	0	0	0	0	0	0
22	23	0.015	0.014	0.019	-0.337	-0.036	-0.062	3.186	-0.051	-12.517	0	-12.415	0	0	0	0	0	0	0	0	0	0	0	0	0	0	0	0
23	24	0	-0.078	-0.086	-0.304	-0.398	-0.153	0.048	-0.208	-13.079	-12.415	0	0	0	0	0	0	0	0	0	0	0	0	0	0	0	0	0
27	28	0.034	-0.321	0.006	0	0	0	0	0	0	0	0	0	6.548	-0.405	-0.189	-0.227	-0.024	-0.021	-0.02	0	0	0	0	0	0	0	0
29	30	-0.08	-0.038	-0.057	0	0	0	0	0	0	0	0	6.548	0	3.097	13.457	4.783	0.115	0.124	0.015	0.001	0	0	0	0	0	0	0
31	32	0.011	0.005	0	0	0	0	0	0	0	0	0	-0.405	3.097	0	-13.206	-13.953	0.02	0.009	-0.001	0	0	0	0	0	0	0	0
32	33	-0.001	-0.002	0	0	0	0	0	0	0	0	0	-0.189	13.457	-13.206	0	-11.777	-0.024	-0.021	0.002	0	0	0	0	0	0	0	0
33	34	0.002	-0.001	0	0	0	0	0	0	0	0	0	-0.227	4.783	-13.953	-11.777	0	0.079	0.021	0.002	0	0	0	0	0	0	0	0
38	39	0	0	0	0	0	0	0	0	0	0	0	-0.024	0.115	0.02	-0.024	0.079	0	-10.407	-10.455	0	0	0	0	0	0	0	0
39	40	0	0	0	0	0	0	0	0	0	0	0	-0.021	0.124	0.009	-0.021	0.021	-10.407	0	-10.535	0	0	0	0	0	0	0	0
40	41	0	0	0	0	0	0	0	0	0	0	0	-0.02	0.015	-0.001	0.002	0.002	-10.455	-10.535	0	0	0	0	0	0	0	0	0
44	45	-0.338	0.023	0.048	0	0	0	0	0	0	0	0	0	0.001	0	0	0	0	0	0	0	3.906	-0.246	-0.41	-0.224	0.003	-0.024	-0.009
46	47	-0.039	-0.062	-0.086	0	0	0	0	0	0	0	0	0	0	0	0	0	0	0	0	3.906	0	5.102	2.907	13.713	0.133	0.107	0.163
48	49	-0.002	0	0	0	0	0	0	0	0	0	0	0	0	0	0	0	0	0	0	-0.246	5.102	0	-14.086	-11.683	0.026	0.092	0.008
49	50	0.006	0	0.012	0	0	0	0	0	0	0	0	0	0	0	0	0	0	0	0	-0.41	2.907	-14.086	0	-13.125	-0.028	-0.023	-0.001
50	51	-0.003	0	0.002	0	0	0	0	0	0	0	0	0	0	0	0	0	0	0	0	-0.224	13.713	-11.683	-13.125	0	-0.012	-0.008	-0.001
55	56	0	0	0	0	0	0	0	0	0	0	0	0	0	0	0	0	0	0	0	0.003	0.133	0.026	-0.028	-0.012	0	-10.427	-10.6
56	57	0	0	0	0	0	0	0	0	0	0	0	0	0	0	0	0	0	0	0	-0.024	0.107	0.092	-0.023	-0.008	-10.427	0	-10.325
57	58	0	0	0	0	0	0	0	0	0	0	0	0	0	0	0	0	0	0	0	-0.009	0.163	0.008	-0.001	-0.001	-10.6	-10.325	0
residual:	0.338
2-bond
J(15-16)	J(18-19)	J(22-23)	J(32-33)	J(39-40)
-9.02	-12.704	-12.6703	-12.9717	-10.4582
3-bond
J(28-30)	J(30-32)
5.227	7.1765
4-bond
J(2-5)	J(5-8)	J(15-18)	J(16-18)	J(18-22)	J(28-32)
0.8815	0.763	0.134333	-0.0943333	0.245111	-0.2835

## Sheet: CONF9
Orca lab.	Lab	sigma	Av(258K)	Av(298K)	C1(shift(TMS))	C2(shift(TMS))	ExpSh(258K)	ExpSh(298K)	CalSh(258K)	CalSh(298K)			Orca lab.	Lab	sigma	Av(sigma)	C(shift(TMS))	E(shift)	C(shift)
1H	1H	1H	1H	1H	1H	1H	1H	1H	1H	1H			13C	13C	13C	13C	13C	13C	13C
1	2	22.345	22.345	22.345	9.387	9.387	8.19	8.29	8.31834	8.406			0	1	40.956	40.956	149.342	129.679	132.467
4	5	22.624	22.3855	22.3855	9.3465	9.3465	8.22	8.29	8.28271	8.36968			2	3	39.117	39.098	151.2	134.903	134.202
7	8	22.147											3	4	46.016	45.1575	145.141	129.083	128.543
14	15	27.092	27.092	26.9695	4.64	4.7625	4.19	4.16	4.14288	4.25875			5	6	46.841	46.841	143.457	128.334	126.971
15	16	26.847	26.847		4.885		4.17		4.35838				6	7	44.299
17	18	30.123	30.0397	30.0397	1.69233	1.69233	1.54	1.465	1.55011	1.50543			8	9	39.079
18	19	29.925											10	11	10.967	10.967	179.331	161.781	160.477
19	20	30.071											12	13	110.067	110.067	80.231	67.472	67.9174
21	22	29.734	29.9537	29.9537	1.77833	1.77833	1.42	1.41	1.62575	1.58255			13	14	98.418	98.418	91.88	79.352	78.7976
22	23	30.166											16	17	154.251	154.251	36.047	27.002	26.6496
23	24	29.961											20	21	154.714
27	28	24.515	24.4995	24.4995	7.2325	7.2325	8.12	7.615	6.42324	6.47385			24	25	5.577	5.4445	184.853	166.965	165.635
29	30	26.944	26.889	26.889	4.843	4.843	4.86	4.84	4.32144	4.33094			28	29	127.468	128.288	62.01	48.85	50.899
31	32	29.733	29.8583	29.8583	1.87367	1.87367	1.61	1.57	1.70961	1.66805			30	31	166.816	166.94	23.3575	15.823	14.7976
32	33	29.742											34	35	-4.185	-4.727	195.025	173.23	175.135
33	34	30.085											37	38	127.717	127.643	62.6545	51.445	51.501
38	39	27.577	27.5837	27.5837	4.14833	4.14833	3.82	3.81	3.71041	3.70797			41	42	5.312
39	40	27.618											45	46	129.108			MAE:	1.10879
40	41	27.757						MAE(C-H):	0.154465	0.152069			47	48	167.065
44	45	24.484						AE(N-H):	1.69676	1.14115			51	52	-5.269
46	47	26.834											54	55	127.57
48	49	30.084
49	50	29.727
50	51	29.779
55	56	27.561
56	57	27.577
57	58	27.412
orca lab		1	4	7	14	15	17	18	19	21	22	23	27	29	31	32	33	38	39	40	44	46	48	49	50	55	56	57
	Lab.	2	5	8	15	16	18	19	20	22	23	24	28	30	32	33	34	39	40	41	45	47	49	50	51	56	57	58
1	2	0	0.939	0.978	0.001	0	0.015	0	0	0	0	0	0.039	-0.085	0.003	0.01	-0.001	0	0	0	0.038	-0.078	-0.001	0.003	0.01	0	0	0
4	5	0.939	0	0.641	0.009	-0.004	0.018	0.008	-0.082	0.005	0.016	-0.039	-0.302	-0.04	-0.001	0.005	-0.002	0	-0.001	0	0.003	-0.053	0	0	0	0	0	0
7	8	0.978	0.641	0	0.003	0.002	0.014	0.01	-0.078	0.008	0.011	-0.037	0.005	-0.058	0	0	0	0	0	0	-0.305	-0.036	-0.002	-0.001	0.005	0	0	0
14	15	0.001	0.009	0.003	0	-9.091	-0.022	1.218	-0.396	0.276	-0.396	-0.279	0	0	0	0	0	0	0	0	0	0	0	0	0	0	0	0
15	16	0	-0.004	0.002	-9.091	0	-0.33	0.475	-0.295	0.206	0.07	-0.252	0	0	0	0	0	0	0	0	0	0	0	0	0	0	0	0
17	18	0.015	0.018	0.014	-0.022	-0.33	0	-12.494	-12.338	-0.062	3.192	-0.081	0	0	0	0	0	0	0	0	0	0	0	0	0	0	0	0
18	19	0	0.008	0.01	1.218	0.475	-12.494	0	-13.099	-0.184	-0.171	-0.207	0	0	0	0	0	0	0	0	0	0	0	0	0	0	0	0
19	20	0	-0.082	-0.078	-0.396	-0.295	-12.338	-13.099	0	-0.222	0.051	-0.164	0	0	0	0	0	0	0	0	0	0	0	0	0	0	0	0
21	22	0	0.005	0.008	0.276	0.206	-0.062	-0.184	-0.222	0	-12.369	-13.244	0	0	0	0	0	0	0	0	0	0	0	0	0	0	0	0
22	23	0	0.016	0.011	-0.396	0.07	3.192	-0.171	0.051	-12.369	0	-12.6	0	0	0	0	0	0	0	0	0	0	0	0	0	0	0	0
23	24	0	-0.039	-0.037	-0.279	-0.252	-0.081	-0.207	-0.164	-13.244	-12.6	0	0	0	0	0	0	0	0	0	0	0	0	0	0	0	0	0
27	28	0.039	-0.302	0.005	0	0	0	0	0	0	0	0	0	6.249	-0.233	-0.389	-0.186	0.002	-0.02	-0.004	0	0	0	0	0	0	0	0
29	30	-0.085	-0.04	-0.058	0	0	0	0	0	0	0	0	6.249	0	5.034	2.977	13.652	0.124	0.09	0.165	0	0	0	0	0	0	0	0
31	32	0.003	-0.001	0	0	0	0	0	0	0	0	0	-0.233	5.034	0	-13.937	-11.655	0.027	0.092	0.007	0	0	0	0	0	0	0	0
32	33	0.01	0.005	0	0	0	0	0	0	0	0	0	-0.389	2.977	-13.937	0	-13.224	-0.028	-0.022	-0.001	0	0	0	0	0	0	0	0
33	34	-0.001	-0.002	0	0	0	0	0	0	0	0	0	-0.186	13.652	-11.655	-13.224	0	-0.011	-0.008	-0.001	0	0	0	0	0	0	0	0
38	39	0	0	0	0	0	0	0	0	0	0	0	0.002	0.124	0.027	-0.028	-0.011	0	-10.375	-10.617	0	0	0	0	0	0	0	0
39	40	0	-0.001	0	0	0	0	0	0	0	0	0	-0.02	0.09	0.092	-0.022	-0.008	-10.375	0	-10.27	0	0	0	0	0	0	0	0
40	41	0	0	0	0	0	0	0	0	0	0	0	-0.004	0.165	0.007	-0.001	-0.001	-10.617	-10.27	0	0	0	0	0	0	0	0	0
44	45	0.038	0.003	-0.305	0	0	0	0	0	0	0	0	0	0	0	0	0	0	0	0	0	6.744	-0.185	-0.227	-0.401	-0.02	-0.023	-0.02
46	47	-0.078	-0.053	-0.036	0	0	0	0	0	0	0	0	0	0	0	0	0	0	0	0	6.744	0	13.435	4.798	3.072	0.016	0.115	0.125
48	49	-0.001	0	-0.002	0	0	0	0	0	0	0	0	0	0	0	0	0	0	0	0	-0.185	13.435	0	-11.73	-13.247	0.002	-0.024	-0.022
49	50	0.003	0	-0.001	0	0	0	0	0	0	0	0	0	0	0	0	0	0	0	0	-0.227	4.798	-11.73	0	-13.898	0.003	0.079	0.022
50	51	0.01	0	0.005	0	0	0	0	0	0	0	0	0	0	0	0	0	0	0	0	-0.401	3.072	-13.247	-13.898	0	-0.001	0.02	0.009
55	56	0	0	0	0	0	0	0	0	0	0	0	0	0	0	0	0	0	0	0	-0.02	0.016	0.002	0.003	-0.001	0	-10.447	-10.562
56	57	0	0	0	0	0	0	0	0	0	0	0	0	0	0	0	0	0	0	0	-0.023	0.115	-0.024	0.079	0.02	-10.447	0	-10.371
57	58	0	0	0	0	0	0	0	0	0	0	0	0	0	0	0	0	0	0	0	-0.02	0.125	-0.022	0.022	0.009	-10.562	-10.371	0
residual:	0.305
2-bond
J(15-16)	J(18-19)	J(22-23)	J(32-33)	J(39-40)
-9.091	-12.6437	-12.7377	-12.9485	-10.4403
3-bond
J(28-30)	J(30-32)
6.4965	7.16133
4-bond
J(2-5)	J(5-8)	J(15-18)	J(16-18)	J(18-22)	J(28-32)
0.9585	0.641	0.137333	-0.0915	0.239111	-0.270167

## Sheet: CONF10
Orca lab.	Lab	sigma	Av(258K)	Av(298K)	C1(shift(TMS))	C2(shift(TMS))	ExpSh(258K)	ExpSh(298K)	CalSh(258K)	CalSh(298K)			Orca lab.	Lab	sigma	Av(sigma)	C(shift(TMS))	E(shift)	C(shift)
1H	1H	1H	1H	1H	1H	1H	1H	1H	1H	1H			13C	13C	13C	13C	13C	13C	13C
1	2	22.254	22.254	22.254	9.478	9.478	8.19	8.29	8.34426	8.42949			0	1	40.936	40.936	149.362	129.679	132.593
4	5	22.588	22.356	22.356	9.376	9.376	8.22	8.29	8.25521	8.33869			2	3	39.849	39.4945	150.803	134.903	133.937
7	8	22.124											3	4	46.285	45.4065	144.892	129.083	128.424
14	15	27.111	27.111	26.9725	4.621	4.7595	4.19	4.16	4.1041	4.22908			5	6	46.815	46.815	143.483	128.334	127.11
15	16	26.834	26.834		4.898		4.17		4.34592				6	7	44.528
17	18	29.939	30.0517	30.0517	1.68033	1.68033	1.54	1.465	1.53689	1.48801			8	9	39.14
18	19	30.1											10	11	10.759	10.759	179.539	161.781	160.736
19	20	30.116											12	13	110.155	110.155	80.143	67.472	68.0394
21	22	30.155	29.9353	29.9353	1.79667	1.79667	1.42	1.41	1.63845	1.59157			13	14	98.48	98.48	91.818	79.352	78.9276
22	23	29.952											16	17	154.56	154.56	35.738	27.002	26.6273
23	24	29.699											20	21	155.112
27	28	24.525	24.4225	24.4225	7.3095	7.3095	8.12	7.615	6.45116	6.49909			24	25	5.777	6.3015	183.996	166.965	164.893
29	30	26.817	26.822	26.822	4.91	4.91	4.86	4.84	4.35639	4.36306			28	29	129.259	129.29	61.008	48.85	50.1941
31	32	29.777	29.8652	29.8652	1.86683	1.86683	1.61	1.57	1.69971	1.65403			30	31	167.035	167.125	23.1725	15.823	14.9088
32	33	30.095											34	35	-5.371	-5.1755	195.474	173.23	175.597
33	34	29.745											37	38	127.517	127.516	62.7825	51.445	51.849
38	39	27.597	27.5292	27.5292	4.20283	4.20283	3.82	3.81	3.73904	3.73354			41	42	6.826
39	40	27.426											45	46	129.321			MAE:	1.17498
40	41	27.569						MAE(C-H):	0.149681	0.137409			47	48	167.216
44	45	24.32						AE(N-H):	1.66884	1.11591			51	52	-4.98
46	47	26.827											54	55	127.514
48	49	29.967
49	50	29.833
50	51	29.774
55	56	27.46
56	57	27.571
57	58	27.552
orca lab		1	4	7	14	15	17	18	19	21	22	23	27	29	31	32	33	38	39	40	44	46	48	49	50	55	56	57
	Lab.	2	5	8	15	16	18	19	20	22	23	24	28	30	32	33	34	39	40	41	45	47	49	50	51	56	57	58
1	2	0	0.957	0.994	0.001	0	0	0	0.015	0	0	0	0.038	-0.079	0.011	-0.001	0.003	0	0	0	0.047	-0.076	0.002	0	0.012	0	0	0
4	5	0.957	0	0.602	0.01	-0.005	0.009	-0.086	0.019	0.016	-0.035	0.004	-0.325	-0.028	0.005	-0.002	-0.001	0	0	0	0.017	-0.046	0	0	0	0	0	0
7	8	0.994	0.602	0	-0.002	0.009	0.009	-0.082	0.014	0.011	-0.033	0.008	0.004	-0.054	0	0	0	0	0	0	-0.366	-0.031	-0.003	-0.002	0.005	0	0	0.001
14	15	0.001	0.01	-0.002	0	-9.046	1.318	-0.408	-0.04	-0.407	-0.262	0.235	0	0	0	0	0	0	0	0	0	0	0	0	0	0	0	0
15	16	0	-0.005	0.009	-9.046	0	0.473	-0.297	-0.336	0.061	-0.239	0.104	0	0	0	0	0	0	0	0	0	0	0	0	0	0	0	0
17	18	0	0.009	0.009	1.318	0.473	0	-13.073	-12.586	-0.193	-0.203	-0.199	0	0	0	0	0	0	0	0	0	0	0	0	0	0	0	0
18	19	0	-0.086	-0.082	-0.408	-0.297	-13.073	0	-12.364	0.062	-0.161	-0.222	0	0	0	0	0	0	0	0	0.001	0	0	0	0	0	0	0
19	20	0.015	0.019	0.014	-0.04	-0.336	-12.586	-12.364	0	3.185	-0.086	-0.055	0	0	0	0	0	0	0	0	0	0	0	0	0	0	0	0
21	22	0	0.016	0.011	-0.407	0.061	-0.193	0.062	3.185	0	-12.603	-12.394	0	0	0	0	0	0	0	0	0	0	0	0	0	0	0	0
22	23	0	-0.035	-0.033	-0.262	-0.239	-0.203	-0.161	-0.086	-12.603	0	-13.274	0	0	0	0	0	0	0	0	0	0	0	0	0	0	0	0
23	24	0	0.004	0.008	0.235	0.104	-0.199	-0.222	-0.055	-12.394	-13.274	0	0	0	0	0	0	0	0	0	0	0	0	0	0	0	0	0
27	28	0.038	-0.325	0.004	0	0	0	0	0	0	0	0	0	6.995	-0.397	-0.185	-0.221	-0.02	-0.019	-0.02	0	0	0	0	0	0	0	0
29	30	-0.079	-0.028	-0.054	0	0	0	0	0	0	0	0	6.995	0	3.133	13.475	4.79	0.122	0.132	0.016	0	0	0	0	0	0	0	0
31	32	0.011	0.005	0	0	0	0	0	0	0	0	0	-0.397	3.133	0	-13.208	-13.946	0.02	0.011	-0.001	0	0	0	0	0	0	0	0
32	33	-0.001	-0.002	0	0	0	0	0	0	0	0	0	-0.185	13.475	-13.208	0	-11.764	-0.024	-0.022	0.001	0	0	0	0	0	0	0	0
33	34	0.003	-0.001	0	0	0	0	0	0	0	0	0	-0.221	4.79	-13.946	-11.764	0	0.081	0.024	0.002	0	0	0	0	0	0	0	0
38	39	0	0	0	0	0	0	0	0	0	0	0	-0.02	0.122	0.02	-0.024	0.081	0	-10.381	-10.407	0	0	0	0	0	0	0	0
39	40	0	0	0	0	0	0	0	0	0	0	0	-0.019	0.132	0.011	-0.022	0.024	-10.381	0	-10.582	0	0	0	0	0	0	0	0
40	41	0	0	0	0	0	0	0	0	0	0	0	-0.02	0.016	-0.001	0.001	0.002	-10.407	-10.582	0	0	0	0	0	0	0	0	0
44	45	0.047	0.017	-0.366	0	0	0	0.001	0	0	0	0	0	0	0	0	0	0	0	0	0	4.548	-0.216	-0.262	-0.432	-0.029	-0.019	-0.036
46	47	-0.076	-0.046	-0.031	0	0	0	0	0	0	0	0	0	0	0	0	0	0	0	0	4.548	0	13.501	4.862	3.003	0.132	0.014	0.121
48	49	0.002	0	-0.003	0	0	0	0	0	0	0	0	0	0	0	0	0	0	0	0	-0.216	13.501	0	-11.684	-13.152	-0.022	0.002	-0.024
49	50	0	0	-0.002	0	0	0	0	0	0	0	0	0	0	0	0	0	0	0	0	-0.262	4.862	-11.684	0	-14.025	0.025	0.004	0.079
50	51	0.012	0	0.005	0	0	0	0	0	0	0	0	0	0	0	0	0	0	0	0	-0.432	3.003	-13.152	-14.025	0	0.009	-0.001	0.019
55	56	0	0	0	0	0	0	0	0	0	0	0	0	0	0	0	0	0	0	0	-0.029	0.132	-0.022	0.025	0.009	0	-10.613	-10.398
56	57	0	0	0	0	0	0	0	0	0	0	0	0	0	0	0	0	0	0	0	-0.019	0.014	0.002	0.004	-0.001	-10.613	0	-10.43
57	58	0	0	0.001	0	0	0	0	0	0	0	0	0	0	0	0	0	0	0	0	-0.036	0.121	-0.024	0.079	0.019	-10.398	-10.43	0
residual:	0.366
2-bond
J(15-16)	J(18-19)	J(22-23)	J(32-33)	J(39-40)
-9.046	-12.6743	-12.757	-12.9632	-10.4685
3-bond
J(28-30)	J(30-32)
5.7715	7.12733
4-bond
J(2-5)	J(5-8)	J(15-18)	J(16-18)	J(18-22)	J(28-32)
0.9755	0.602	0.132667	-0.099	0.236444	-0.2855

[truncated: 8 more sheets: CONF11, CONF12, CONF13, CONF14, CONF15, CONF16, CONF17, All]
